# Supplementary material
Source: Royal Society of Chemistry journal article supplement (doi:10.1039/d6qo00310a)

# Supporting Information

## Metal-Free C(sp<sup>2</sup>)-H Trifluoromethylation and Perfluoroalkylation of Enamines via the Aryl Radical-Mediated Halogen Atom Transfer

Lei Chen,<sup>†\*</sup> Xiao-Yang Liu,<sup>†</sup> Ting Gao,<sup>†</sup> Lang Qin,<sup>†</sup> Yi-Ting Di<sup>†</sup> and Wei Zhang <sup>†\*</sup>

<sup>†</sup>School of Pharmacy, North Sichuan Medical College, Nanchong 637000, P. R. China.

\*Corresponding author, e-mail: chenlei@nsmc.edu.cn, wzhang@nsmc.edu.cn

### Table of contents

|                                                                      |     |
|----------------------------------------------------------------------|-----|
| 1. General information.....                                          | S2  |
| 2. Optimization of reaction condition.....                           | S2  |
| 3. General procedure for fluoroalkylation reactions of enamides..... | S5  |
| 4. The procedure for the one-pot synthesis of 4d from aniline.....   | S6  |
| 5. The procedure for the scale-up reaction.....                      | S7  |
| 6. Product derivations.....                                          | S8  |
| 7. Mechanistic studies.....                                          | S9  |
| 8. Unsuccessful examples.....                                        | S12 |
| 9. References.....                                                   | S13 |
| 10. Characterization data and spectra of products.....               | S13 |

## General information

Commercially available chemicals were obtained from J&K, Energy Chemical, Adamas, etc. and used as received unless otherwise stated. Anhydrous solvents were purchased from J&K and used without further purification. All of enamides were prepared as reported in the reference<sup>1</sup>. And diazonium salts were freshly prepared according to the literature<sup>2</sup>. Column chromatography was generally performed on silica gel (200 – 300 mesh or 300 - 400 mesh) and reactions were monitored by thin layer chromatography (TLC) using UV light to visualize the course of the reactions. Photoreactor A was purchased from GeAo Chemical, which was assembled by using 24×3 W LED beads (460 - 465 nm, 72 W in total, 18 W for each hole) and an integrated fan. Photoreactor B was assembled using a 30 W LED array (peak wavelength = 460 nm) purchased from Shenzhen Xinxingyuan Guangdian Co., Ltd. <sup>1</sup>H NMR, <sup>13</sup>C NMR and <sup>19</sup>F NMR spectra were recorded at 25 °C on a Bruker Advance 400 M NMR spectrometers (CDCl<sub>3</sub> as solvent). High resolution mass spectral analysis (HRMS) was performed on Waters ACQUITY UPLCI-Class/XEVO G2-XS Qtof-MS. High-resolution mass spectrometric measurements were provided by Sci-go Instrument Testing Platform.

## Optimization of reaction condition

### Diazonium salts screening

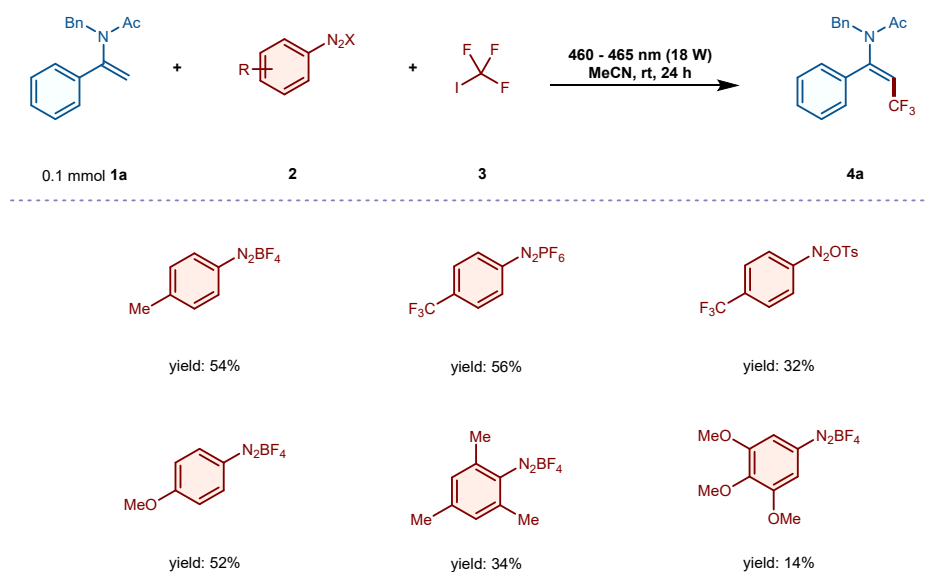

Standard conditions: **1a** (0.1 mmol, 1.0 equiv), **2** (0.2 mmol, 2.0 equiv), **3** (0.2 mmol, 2.0 equiv), MeCN (1.0 mL), irradiated by 18 W Blue LED ( $\lambda = 460 - 465$  nm) under a nitrogen atmosphere for 24 h, r.t. Yields were determined by <sup>1</sup>H NMR analysis using 1,3,5-Trimethoxybenzene as an internal

standard.

## Solvent screening

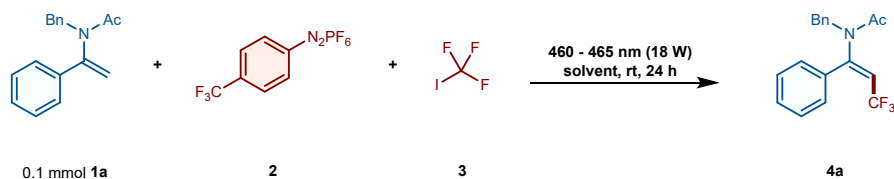

| Entry | Solvent | Yield <b>4a</b> (%) |
|-------|---------|---------------------|
| 1     | DMF     | 35%                 |
| 2     | DMSO    | 40%                 |
| 3     | DMA     | 15%                 |
| 4     | NMP     | 4%                  |
| 5     | DCM     | 53%                 |
| 6     | DCE     | 41%                 |
| 7     | EA      | 34%                 |
| 8     | Dioxane | 46%                 |

Standard conditions: **1a** (0.1 mmol, 1.0 equiv), **2** (0.2 mmol, 2.0 equiv), **3** (0.2 mmol, 2.0 equiv), solvent (1.0 mL), irradiated by 18 W Blue LED ( $\lambda = 460 - 465 \text{ nm}$ ) under a nitrogen atmosphere for 24 h, r.t. Yields were determined by  $^1\text{H}$  NMR analysis using 1,3,5-Trimethoxybenzene as an internal standard.

## Light sources screening

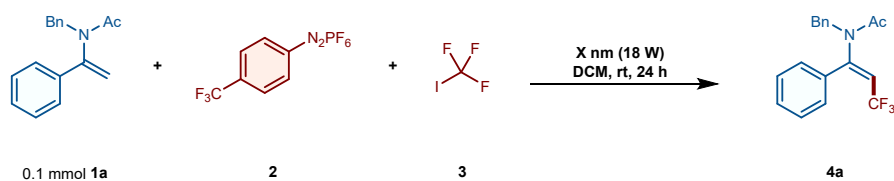

| Entry | $\lambda = \text{nm}$ | Yield <b>4a</b> (%) |
|-------|-----------------------|---------------------|
| 1     | 395 – 400 nm          | 37%                 |
| 2     | 410 – 420 nm          | 49%                 |

|   |                    |     |
|---|--------------------|-----|
| 3 | 440 – 450 nm       | 46% |
| 4 | 460 – 465 nm (6 W) | 30% |

Standard conditions: **1a** (0.1 mmol, 1.0 equiv), **2** (0.2 mmol, 2.0 equiv), **3** (0.2 mmol, 2.0 equiv), DCM (1.0 mL), irradiated by 18 W Blue LED ( $\lambda = \text{nm}$ ) under a nitrogen atmosphere for 24 h, r.t. Yields were determined by  $^1\text{H}$  NMR analysis using 1,3,5-Trimethoxybenzene as an internal standard.

### Equivalent screening

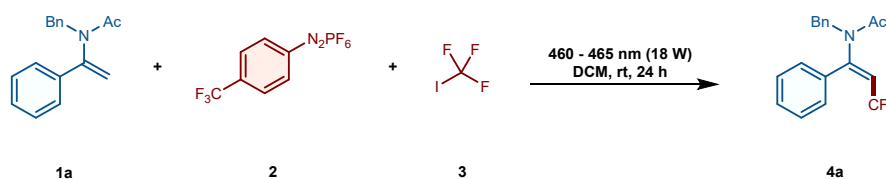

| Entry | Equivalent                                                                                   | Yield <b>4a</b> (%) |
|-------|----------------------------------------------------------------------------------------------|---------------------|
| 1     | <b>1a</b> (0.2 mmol, 2 equiv), <b>2</b> (0.1 mmol, 1 equiv), <b>3</b> (0.15 mmol, 1.5 equiv) | 40%                 |
| 2     | <b>1a</b> (0.2 mmol, 2 equiv), <b>2</b> (0.15 mmol, 1.5 equiv), <b>3</b> (0.1 mmol, 1 equiv) | 21%                 |
| 3     | <b>1a</b> (0.2 mmol, 2 equiv), <b>2</b> (0.2 mmol, 2 equiv), <b>3</b> (0.1 mmol, 1 equiv)    | 24%                 |

Standard conditions: DCM (1.0 mL), irradiated by 18 W Blue LED ( $\lambda = \text{nm}$ ) under a nitrogen atmosphere for 24 h, r.t. Yields were determined by  $^1\text{H}$  NMR analysis using 1,3,5-Trimethoxybenzene as an internal standard.

### Base screening

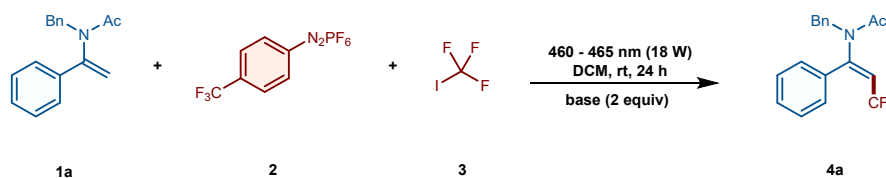

| Entry | Base  | Yield <b>4a</b> (%) |
|-------|-------|---------------------|
| 1     | DABCO | 40%                 |
| 2     | DMAP  | 54%                 |

|   |                                  |     |
|---|----------------------------------|-----|
| 3 | Cs <sub>2</sub> CO <sub>3</sub>  | 21% |
| 4 | NaH <sub>2</sub> PO <sub>4</sub> | 39% |

Standard conditions: **1a** (0.2 mmol, 1.0 equiv), **2** (0.4 mmol, 2.0 equiv), **3** (0.4 mmol, 2.0 equiv), MeCN (1.5 mL), irradiated by 18 W Blue LED ( $\lambda = 460 - 465$  nm) under a nitrogen atmosphere for 24 h, r.t. Yields were determined by <sup>1</sup>H NMR analysis using 1,3,5-Trimethoxybenzene as an internal standard.

### General procedure for fluoroalkylation reactions of enamides

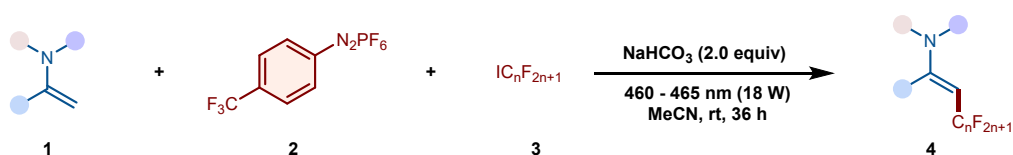

In an oven dried 10 mL Schlenk tube equipped with a stirring bar, diazonium salt **2** (0.4 mmol, 2.0 equiv) and NaHCO<sub>3</sub> (0.4 mmol, 2.0 equiv) were added. Then compound **3** (0.4 mmol, 2.0 equiv) (if **3** is a solid, it can be added to the tube first) and enamides **1** (0.2 mmol, 1.0 equiv) dissolved in 1.5 ml of anhydrous MeCN were added to the tube subsequently under nitrogen atmosphere. The reaction was stirred on photoreactor A (460 - 465 nm LED) for 36 h. The residue was directly purified by flash chromatography on silica gel to give the desired products **4**.

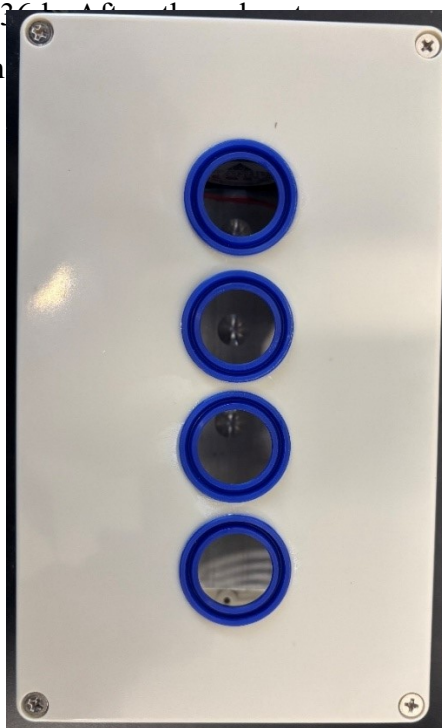

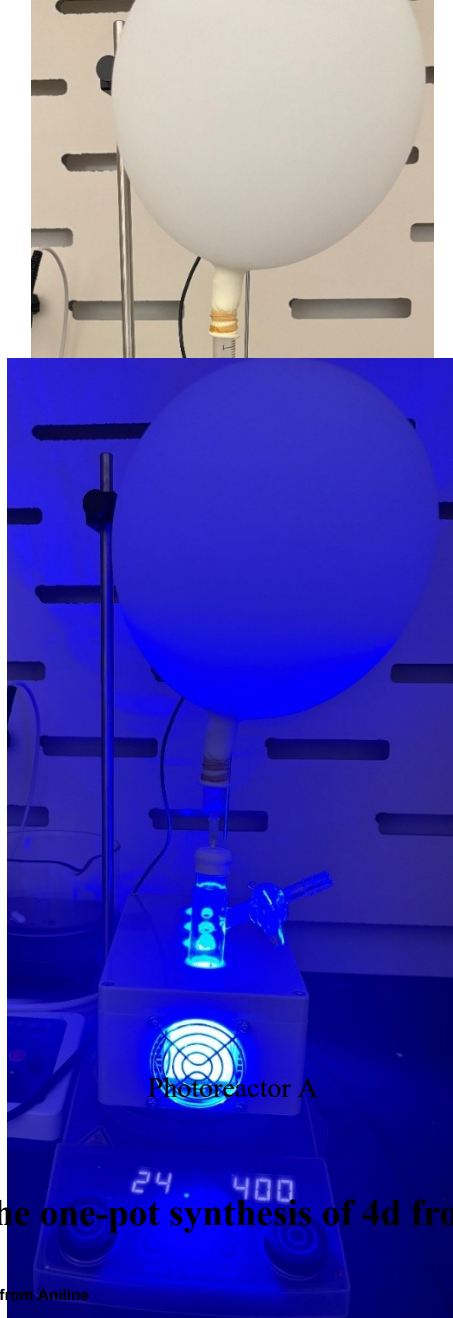

## The procedure for the one-pot synthesis of **4d** from aromatic amine

a) One-Pot Synthesis of **4d** from Aniline

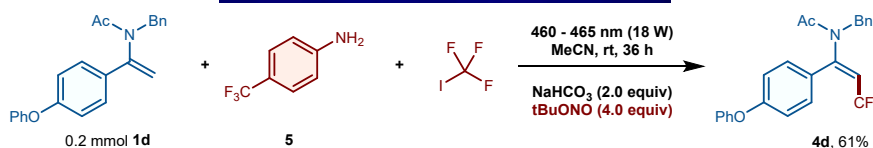

In an oven dried 10 mL Schlenk tube equipped with a stirring bar, NaHCO<sub>3</sub> (0.4 mmol, 2.0 equiv) were added. Then compound **5** (0.6 mmol, 3.0 equiv), CF<sub>3</sub>I (0.4 mmol, 2.0 equiv), enamide **1d** (0.2 mmol, 1.0 equiv dissolved in 1.5 ml of MeCN) and *t*BuONO (0.8 mmol, 4.0 equiv) were added to the tube subsequently under nitrogen atmosphere. The reaction was stirred on photoreactor A (460 - 465 nm LED) for 36 h. After, the solvent was evaporated and the residue was directly purified by flash column chromatography on silica gel to give the desired product **4d** as a colorless oil (50.4 mg, 61% yield).

## The procedure for the scale-up reaction

b) Scale-up experiment

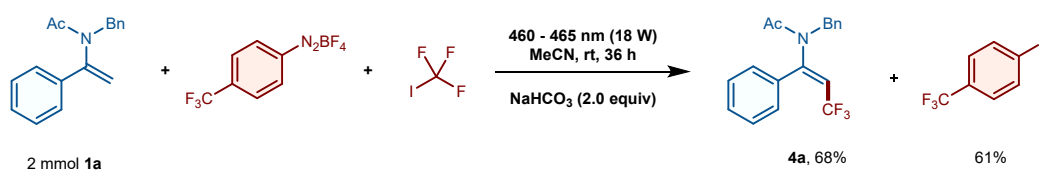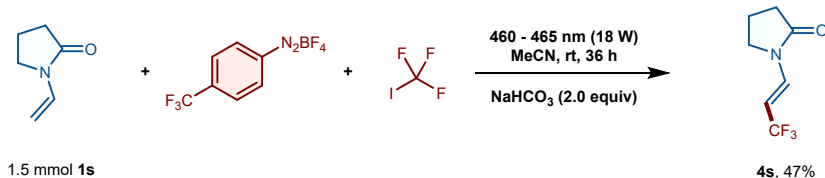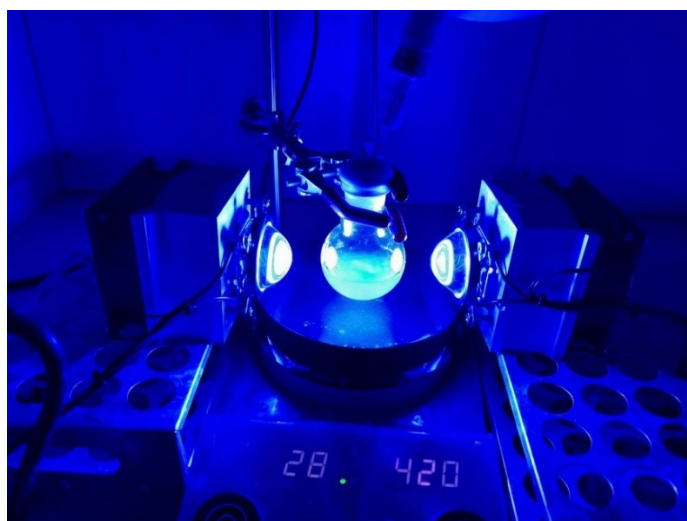

Photoreactor B

In an oven dried 50 mL round-bottom flask equipped with a stirring bar, diazonium salt (4 mmol, 2.0 equiv) and  $\text{NaHCO}_3$  (4 mmol, 2.0 equiv) were added. Then  $\text{ICF}_3$  (4 mmol, 2.0 equiv) and enamides **1a** (2 mmol, 1.0 equiv) dissolved in 10 ml of MeCN were added to the flask subsequently under nitrogen atmosphere. The reaction was stirred on photoreactor B (460 nm LED, 30 W x 2) for 36 h. After, the solvent was evaporated and the residue was directly purified by flash column chromatography on silica gel to give the desired product **4a** as a colorless oil (435.5 mg, 68% yield), *p*- $\text{CF}_3\text{Ph-I}$  byproduct (334.5 mg, 61% yield).

In an oven dried 50 mL round-bottom flask equipped with a stirring bar, diazonium salt (3 mmol, 2.0 equiv) and  $\text{NaHCO}_3$  (3 mmol, 2.0 equiv) were added. Then  $\text{ICF}_3$  (3 mmol, 2.0 equiv) and enamides **1s** (1.5 mmol, 1.0 equiv) dissolved in 10 ml of MeCN were added to the flask subsequently under nitrogen atmosphere. The reaction was stirred on photoreactor B (460 nm LED, 30 W x 2) for 36 h. After, the solvent was evaporated and the residue was directly purified by flash column chromatography on silica gel to

give the desired product **4s** as a colorless oil (125.2 mg, 47% yield).

## Product derivations

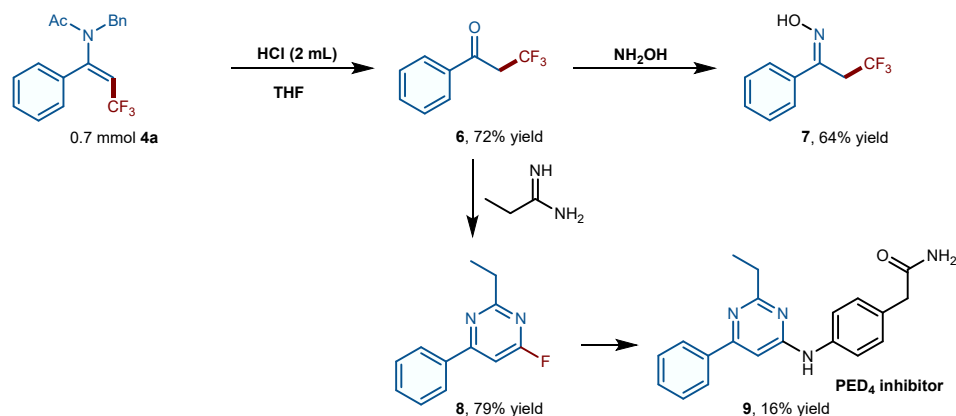

### Procedures for the Synthesis of **6** from **4a**

A mixture of **4a** (0.7 mmol) in THF (5 mL) and concentrated HCl (2 mL) was stirred at room temperature for 12 h. After the reaction was complete (monitored by TLC), the solvent was removed under reduced pressure. The residue was purified by flash column chromatography (petroleum ether/ethyl acetate) to afford the desired product **6** as a yellow oil (96.5 mg, 72% yield).

### Procedures for the Synthesis of **7** from **6**

To a test tube was added **6** (0.1 mmol, 18.8 mg), NH<sub>2</sub>OH·HCl (3.0 equiv, 0.3 mmol, 20.7 mg), NaOAc (2.0 equiv, 0.2 mmol, 16.4 mg) followed by MeOH (2 ml) under air at 60 °C for 2 h. And after cooling, the crude product was purified by silica gel chromatography using a mixture of petroleum ether and ethyl acetate as eluent (PE: EA = 5:1) to give the desired product **7** as a white solid (13 mg, 64% yield).

### Procedures for the Synthesis of **9** from **6**

A mixture of **6** (82.6 mg, 0.44 mmol, 1.0 equiv), amidine hydrochloride (34.6 mg, 0.48 mmol, 1.1 equiv), and KHCO<sub>3</sub> (132 mg, 1.32 mmol, 3.0 equiv) in 1,4-dioxane (3.0 mL) was stirred at 60 °C for 48 h in a 10 mL round-bottom flask equipped with a magnetic stirrer bar. After completion of the reaction (monitored by TLC), the mixture was quenched with H<sub>2</sub>O (10 mL) and extracted with EtOAc (3 × 10 mL). The combined

organic layers were dried over anhydrous  $\text{Na}_2\text{SO}_4$ , concentrated under reduced pressure, and purified by flash silica gel chromatography (PE/EtOAc) to afford the desired product **8** as a yellow oil (70.5 mg, 79% yield).

A mixture of **8** (70.7 mg, 0.35 mmol, 1.0 equiv) and 2-(4-aminophenyl)acetamide (63 mg, 0.42 mmol, 1.2 equiv) in NMP (2.5 mL) was stirred at 120 °C for 16 h. After the reaction was complete (as monitored by TLC), the mixture was quenched with saturated aqueous  $\text{NH}_4\text{Cl}$  (10 mL) and extracted with  $\text{CH}_2\text{Cl}_2$  ( $3 \times 10$  mL). The combined organic layers were dried over anhydrous  $\text{Na}_2\text{SO}_4$ , concentrated under reduced pressure, and purified by column chromatography (silica gel,  $\text{CH}_2\text{Cl}_2/\text{MeOH}$ ) to afford the product **9** as a yellow solid (18.7 mg, 16% yield).

## Mechanistic studies

### (a) Radical trapping experiment with TEMPO

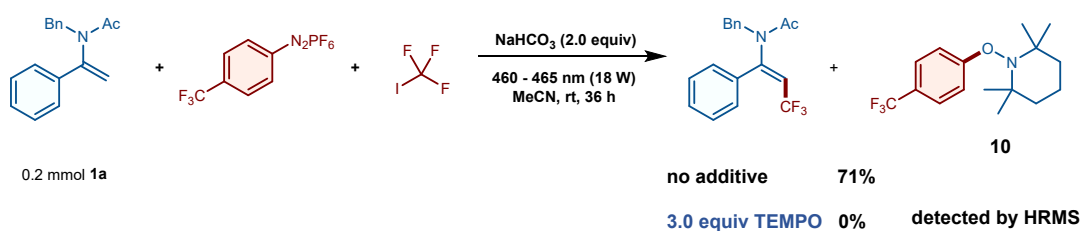

In an oven dried 10 mL Schlenk tube equipped with a stirring bar, diazonium salt **2** (0.4 mmol, 2.0 equiv), TEMPO (0.6 mmol, 3.0 equiv) and  $\text{NaHCO}_3$  (0.4 mmol, 2.0 equiv) were added. Then compound  $\text{ICF}_3$  (0.4 mmol, 2.0 equiv) and enamides **1a** (0.2 mmol, 1.0 equiv) dissolved in 1.5 ml of MeCN were added to the tube subsequently under nitrogen atmosphere. The reaction was stirred on photoreactor A (460 - 465 nm LED) for 36 h. TLC,  $^1\text{H}$  NMR and HR-MS analysis demonstrated the product **4a** is not found. The aryl radical combined with TEMPO were detected by HR-MS.

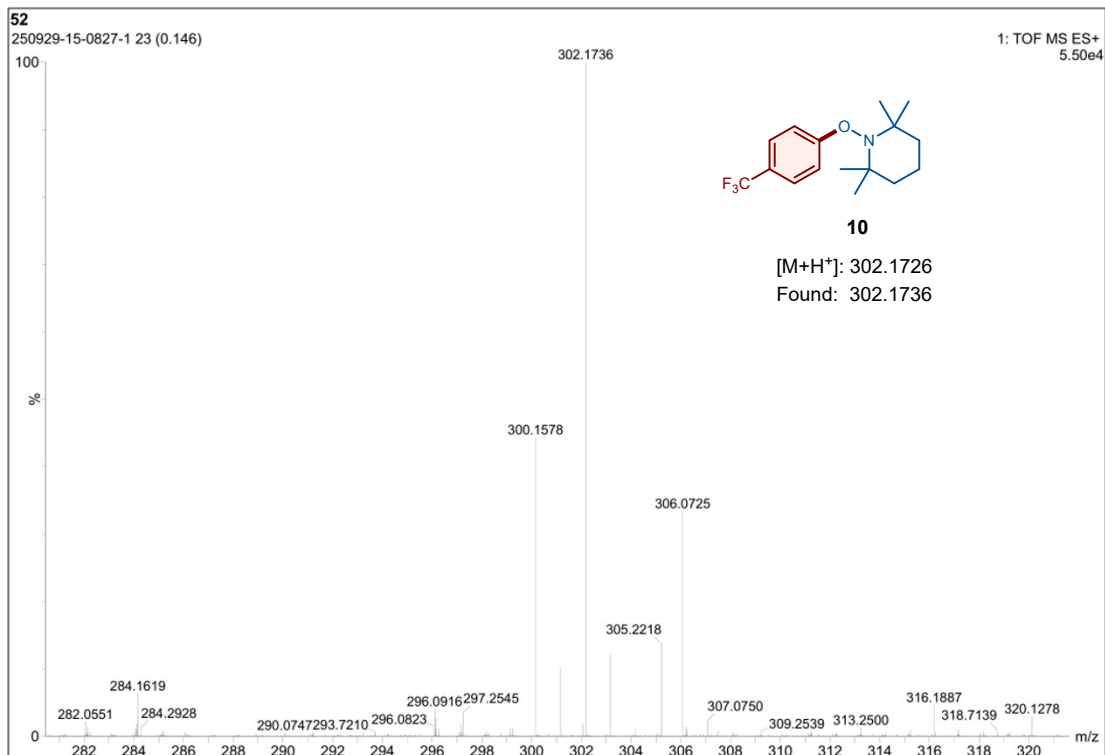

#### Single Mass Analysis

Tolerance = 5.0 mDa / DBE: min = -1.5, max = 50.0

Element prediction: Off

Number of isotope peaks used for i-FIT = 3

Monoisotopic Mass, Even Electron Ions

1321 formula(e) evaluated with 1 results within limits (up to 50 closest results for each mass)

Elements Used:

C: 16-16 H: 23-23 N: 0-100 O: 0-50 F: 1-3 Na: 0-2 Os: 0-1

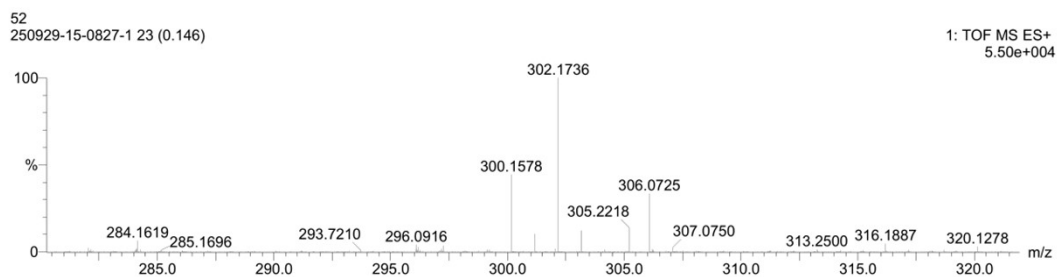

Minimum: -1.5  
Maximum: 5.0 10.0 50.0

| Mass     | Calc. Mass | mDa | PPM | DBE | i-FIT | Norm | Conf (%) | Formula        |
|----------|------------|-----|-----|-----|-------|------|----------|----------------|
| 302.1736 | 302.1732   | 0.4 | 1.3 | 4.5 | 451.6 | n/a  | n/a      | C16 H23 N O F3 |

#### (b) Radical trapping experiment with BHT

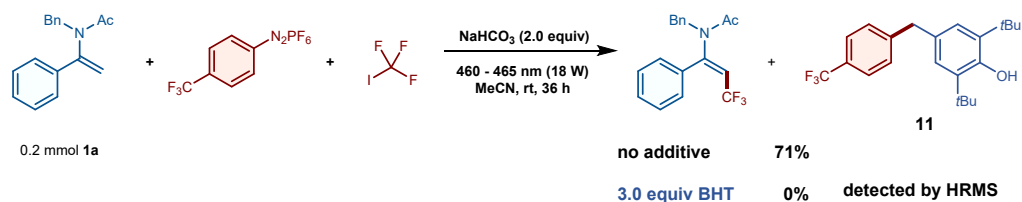

In an oven dried 10 mL Schlenk tube equipped with a stirring bar, diazonium salt **2** (0.4 mmol, 2.0 equiv), BHT (0.6 mmol, 3.0 equiv) and NaHCO<sub>3</sub> (0.4 mmol, 2.0 equiv) were

added. Then compound  $\text{ICF}_3$  (0.4 mmol, 2.0 equiv) and enamides **1a** (0.2 mmol, 1.0 equiv) dissolved in 1.5 ml of MeCN were added to the tube subsequently under nitrogen atmosphere. The reaction was stirred on photoreactor A (460 - 465 nm LED) for 36 h. TLC,  $^1\text{H}$  NMR and HR-MS analysis demonstrated the product **4a** is not found. The aryl radical combined with BHT were detected by HR-MS.

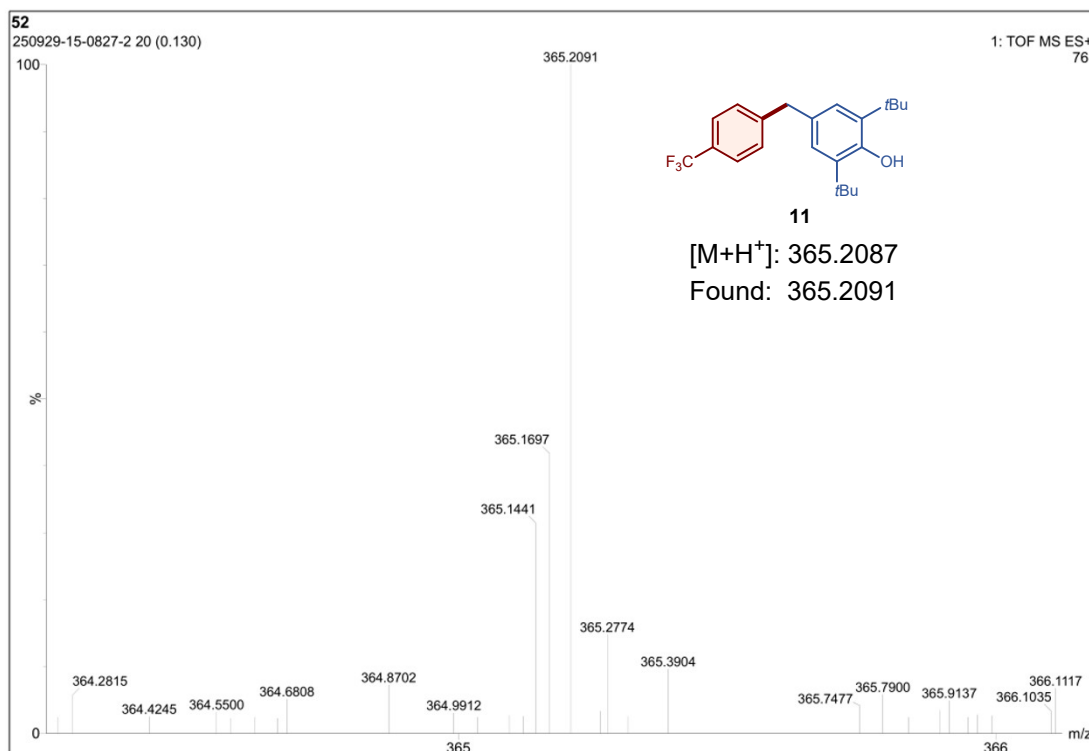

#### Single Mass Analysis

Tolerance = 5.0 mDa / DBE: min = -1.5, max = 50.0

Element prediction: Off

Number of isotope peaks used for i-FIT = 3

Monoisotopic Mass, Even Electron Ions

2348 formula(e) evaluated with 1 results within limits (up to 50 closest results for each mass)

Elements Used:

C: 22-22 H: 8-28 N: 0-100 O: 0-50 F: 1-3 Na: 0-2 Os: 0-1

52  
250929-15-0827-2 20 (0.130)

1: TOF MS ES+  
7.61e+002

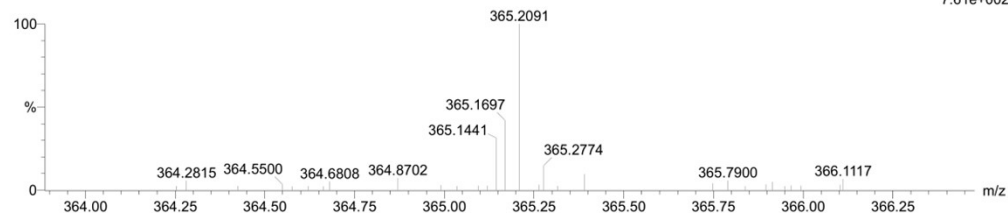

Minimum: -1.5  
Maximum: 5.0 10.0 50.0

| Mass     | Calc. Mass | mDa  | PPM  | DBE | i-FIT | Norm | Conf(%) | Formula      |
|----------|------------|------|------|-----|-------|------|---------|--------------|
| 365.2091 | 365.2092   | -0.1 | -0.3 | 7.5 | 120.5 | n/a  | n/a     | C22 H28 O F3 |

## UV-vis Experiments

Solutions were introduced to a 1 cm path length quartz cuvette and analyzed using a UV - 2700 spectrometer from SHIMADZU. All samples were dissolved at the specified

concentration in the CH<sub>3</sub>CN to be tested. UV-vis spectra of **1a** ( $1.0 \times 10^{-4}$  M), **2** ( $1.0 \times 10^{-4}$  M), ICF<sub>3</sub> ( $1.0 \times 10^{-4}$  M), NaHCO<sub>3</sub> (saturated solution), the mixture of **1a** ( $3.33 \times 10^{-5}$  M)+ **2** ( $6.67 \times 10^{-5}$  M), the mixture of **1a** ( $3.33 \times 10^{-5}$  M)+ ICF<sub>3</sub> ( $6.67 \times 10^{-5}$  M), the mixture of **2** ( $5 \times 10^{-5}$  M)+ ICF<sub>3</sub> ( $5 \times 10^{-5}$  M), the mixture of **1a** ( $2 \times 10^{-5}$  M)+ **2** ( $4 \times 10^{-5}$  M) + ICF<sub>3</sub> ( $4 \times 10^{-5}$  M), the mixture of **1a** ( $1.67 \times 10^{-5}$  M)+ **2** ( $3.3 \times 10^{-5}$  M) + ICF<sub>3</sub> ( $3.3 \times 10^{-5}$  M) + NaHCO<sub>3</sub>, were recorded respectively.

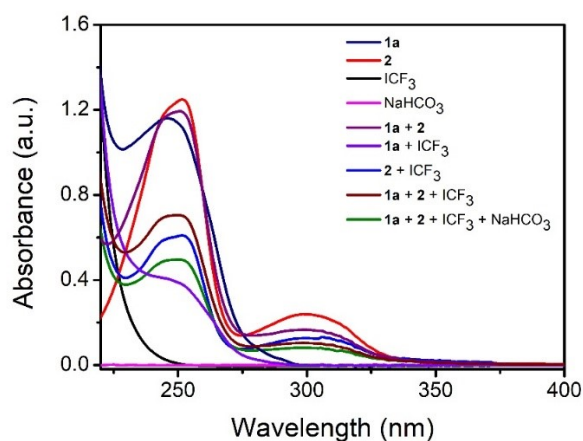

## Unsuccessful examples

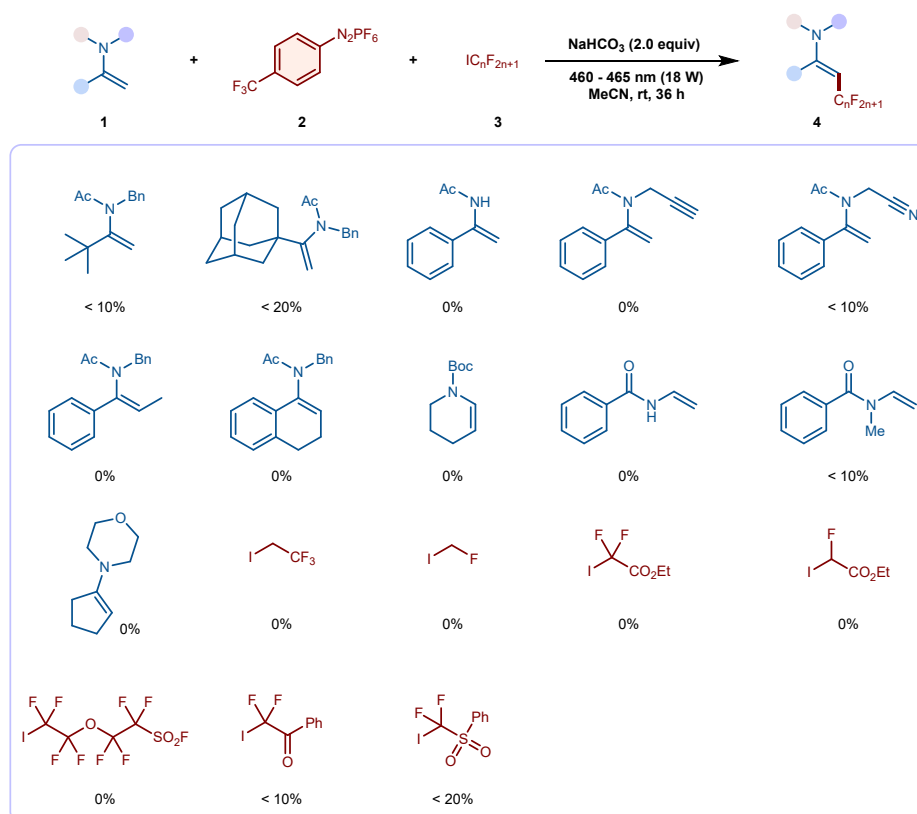

## References

- (a) Wang, Q.-S.; Xie, J.-H.; Li, W.; Zhu, S.-F.; Wang, L.-X.; Zhou, Q.-L. *Org. Lett.* **2011**, *13*, 3388-3391. (b) Chang, X.-C.; Wang, Z.-L.; Zhao, M.; Yang, C.; Li, J.-J.; Ma, W.-W.; Xu, Y.-H. *Org. Lett.* **2020**, *22*, 1326-1330.
- (a) Wu, J.; Gu, Y.; Leng X.; Shen, Q. *Angew. Chem. Int. Ed.* **2015**, *54*, 7648-7652. (b) Xing, B.; Ni, C.; Hu, J. *Angew. Chem. Int. Ed.* **2018**, *57*, 9896-9900.

## Characterization data and spectra of products

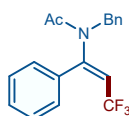

### (*E*)-*N*-benzyl-*N*-(3,3,3-trifluoro-1-phenylprop-1-en-1-yl) acetamide (**4a**)

Following the general procedure, the compound was obtained as a colorless oil in 71% yield (E:Z >20:1, 45.0 mg);  $R_f = 0.35$  (Petroleum ether/EtOAc = 5/1).  $^1\text{H}$  NMR (400 MHz, Chloroform-*d*)  $\delta$  7.52 – 7.44 (m, 3H), 7.37 – 7.28 (m, 5H), 7.20 – 7.17 (m, 2H), 5.49 (q,  $J = 8.0$  Hz, 1H), 4.55 (s, 2H), 2.28 (s, 3H).  $^{13}\text{C}$  NMR (101 MHz,  $\text{CDCl}_3$ )  $\delta$  170.1, 149.8 (q,  $J = 5.9$  Hz), 136.5, 132.9, 130.8, 128.9, 128.7, 128.6, 127.7, 126.2 (q,  $J = 271.7$  Hz), 117.4 (q,  $J = 34.3$  Hz), 49.54, 22.58.  $^{19}\text{F}$  NMR (376 MHz,  $\text{CDCl}_3$ )  $\delta$  -55.9. HRMS (ESI)  $m/z$  Calcd for  $\text{C}_{18}\text{H}_{17}\text{F}_3\text{NO}^+$   $[\text{M}+\text{H}]^+$ : 320.1257, Found: 320.1266.

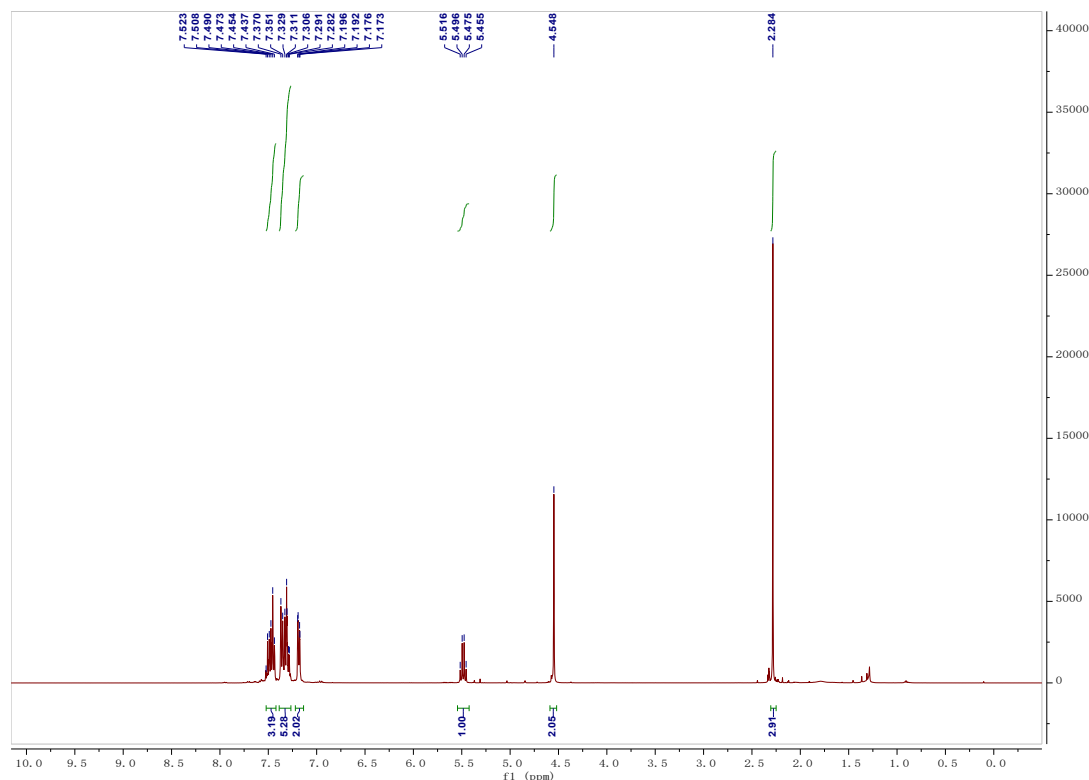

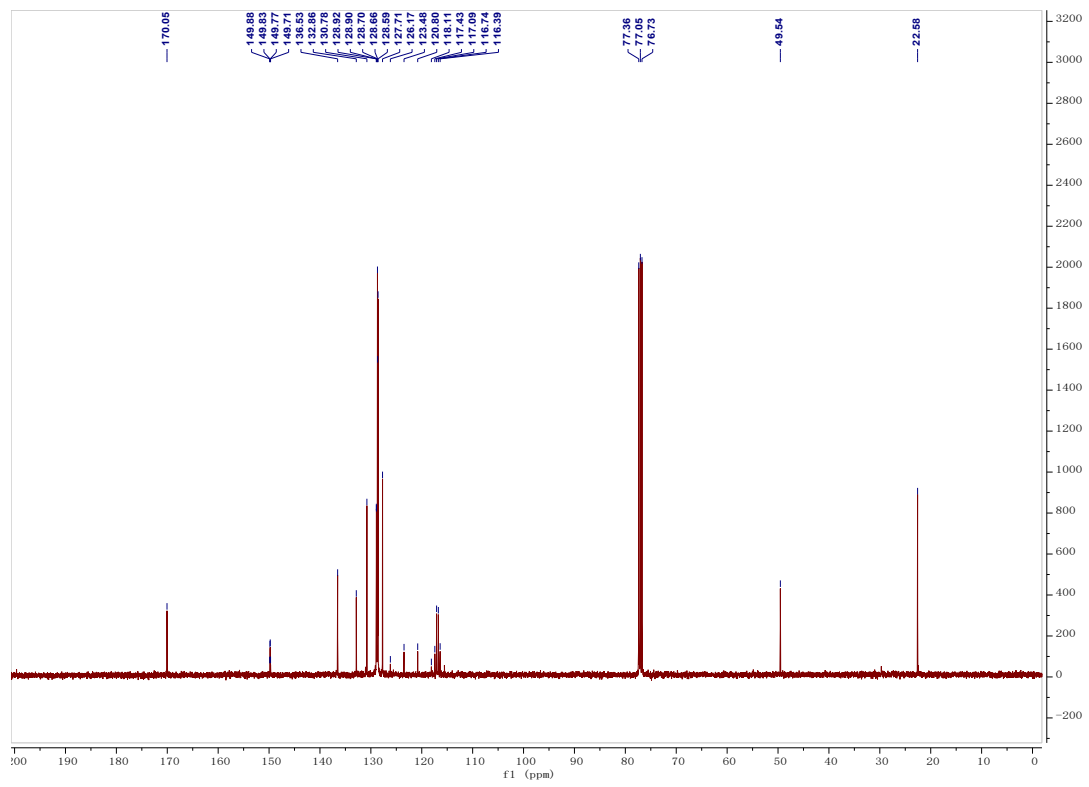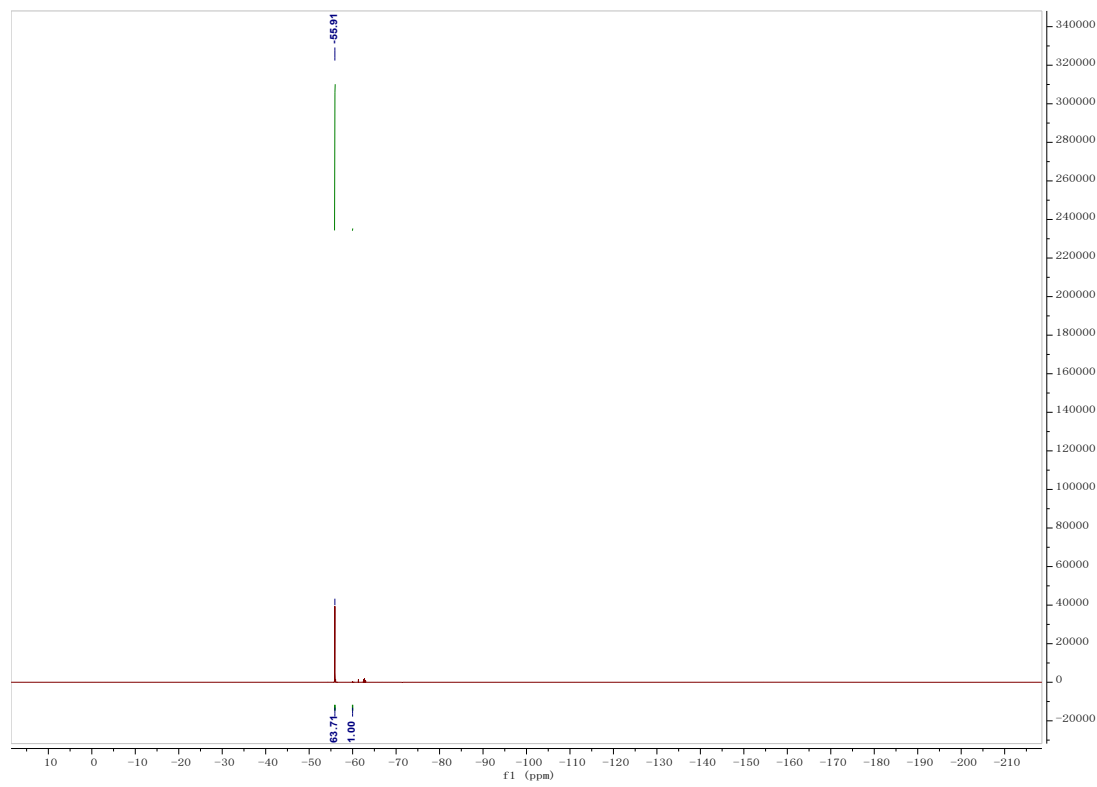

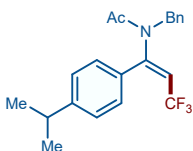

**(*E*)-*N*-benzyl-*N*-(3,3,3-trifluoro-1-(4-isopropylphenyl) prop-1-en-1-yl) acetamide (4b)**

Following the general procedure, the compound was obtained as a colorless oil in 77% yield (E:Z >20:1, 55.7 mg);  $R_f = 0.45$  (Petroleum ether/EtOAc = 5/1).  $^1\text{H}$  NMR (400 MHz, Chloroform- $d$ )  $\delta$  7.34 – 7.28 (m, 7H), 7.21 – 7.18 (m, 2H), 5.42 (q,  $J = 8.4$  Hz, 1H), 4.55 (s, 2H), 2.98 (h,  $J = 7.2$  Hz, 1H), 2.26 (s, 3H), 1.31 (d,  $J = 6.8$  Hz, 6H).  $^{13}\text{C}$  NMR (101 MHz,  $\text{CDCl}_3$ )  $\delta$  170.1, 152.0, 150.0 (q,  $J = 6.2$  Hz), 136.7, 130.1, 129.0, 128.97, 128.8, 128.5, 127.6, 126.8, 126.3 (q,  $J = 271.3$  Hz), 116.9 (q,  $J = 35.4$  Hz), 49.6, 34.0, 23.7, 22.6.  $^{19}\text{F}$  NMR (376 MHz,  $\text{CDCl}_3$ )  $\delta$  -55.9. HRMS (ESI)  $m/z$  Calcd for  $\text{C}_{21}\text{H}_{23}\text{F}_3\text{NO}^+$   $[\text{M}+\text{H}]^+$ : 362.1726, Found: 362.1736.

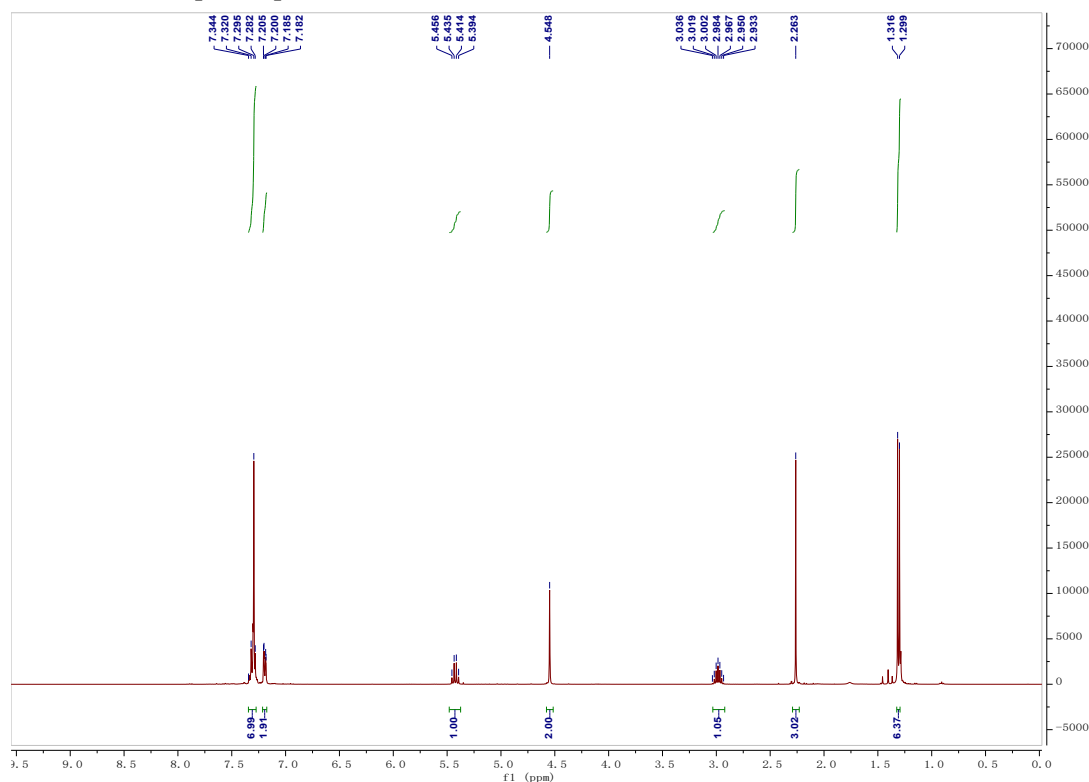

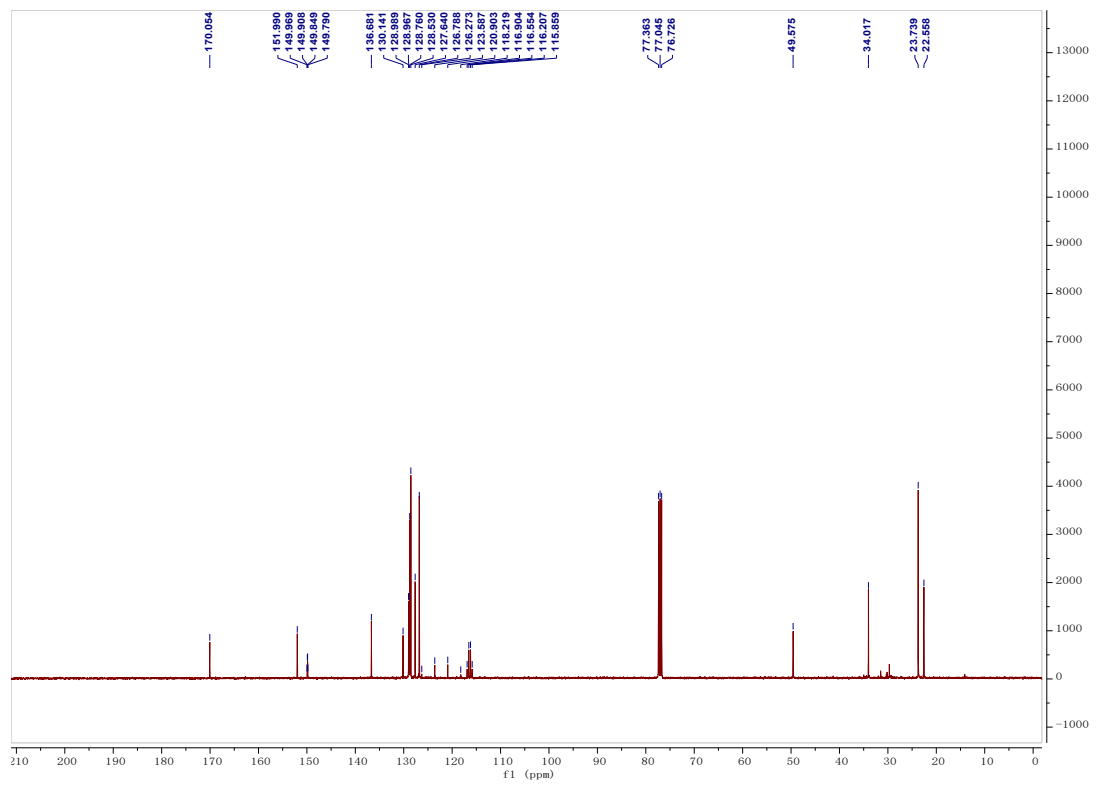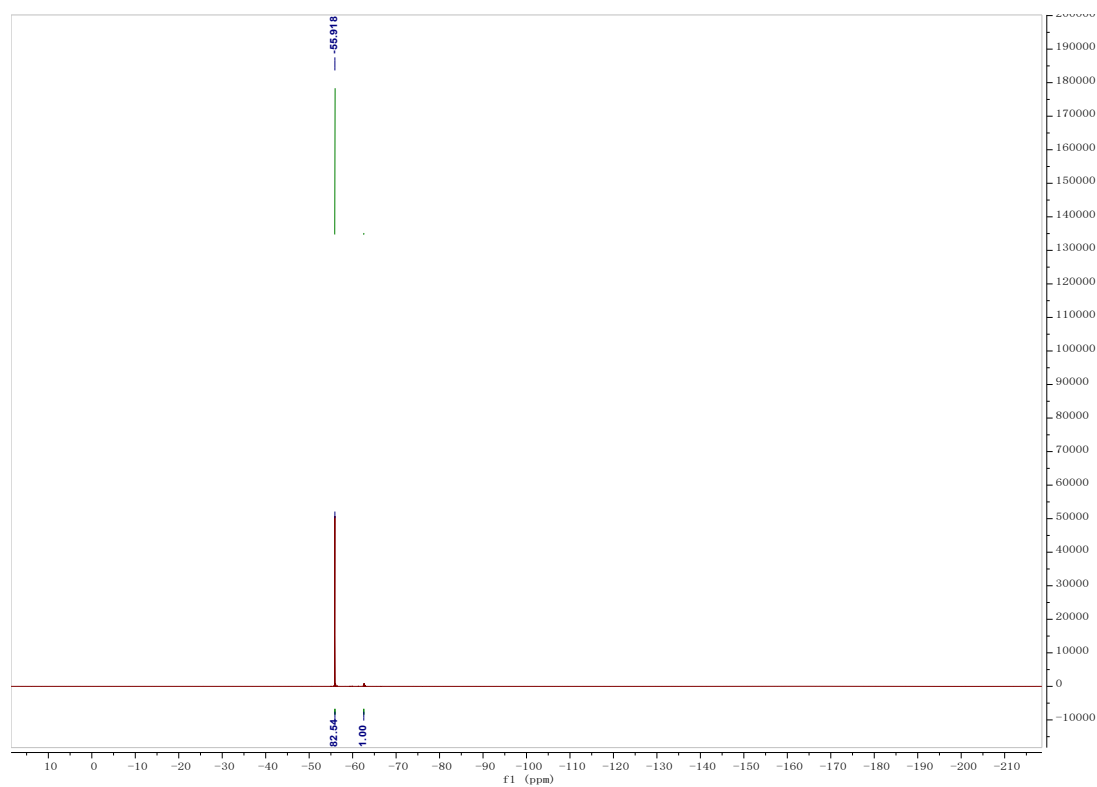

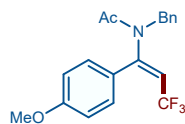

**(*E*)-*N*-benzyl-*N*-(3,3,3-trifluoro-1-(4-methoxyphenyl) prop-1-en-1-yl) acetamide (4c)**

Following the general procedure, the compound was obtained as a colorless oil in 69% yield (E:Z >20:1, 48.3 mg);  $R_f = 0.30$  (Petroleum ether/EtOAc = 5/1).  $^1\text{H}$  NMR (400 MHz, Chloroform- $d$ )  $\delta$  7.32 – 7.28 (m, 5H), 7.18 (dd,  $J = 7.6, 2.0$  Hz, 2H), 7.00 – 6.95 (m, 2H), 5.38 (q,  $J = 8.2$  Hz, 1H), 4.56 (s, 2H), 3.88 (s, 3H), 2.25 (s, 3H).  $^{13}\text{C}$  NMR (101 MHz,  $\text{CDCl}_3$ )  $\delta$  170.2, 161.6, 149.6 (q,  $J = 6.2$  Hz), 136.6, 130.6, 128.7, 128.6, 127.7, 126.4 (q,  $J = 270.9$  Hz), 124.9, 116.1 (q,  $J = 35.1$  Hz), 114.2, 55.4, 49.6, 22.6.  $^{19}\text{F}$  NMR (376 MHz,  $\text{CDCl}_3$ )  $\delta$  -55.9. HRMS (ESI)  $m/z$  Calcd for  $\text{C}_{19}\text{H}_{19}\text{F}_3\text{NO}_2^+$   $[\text{M}+\text{H}]^+$ : 350.1362, Found: 350.1371.

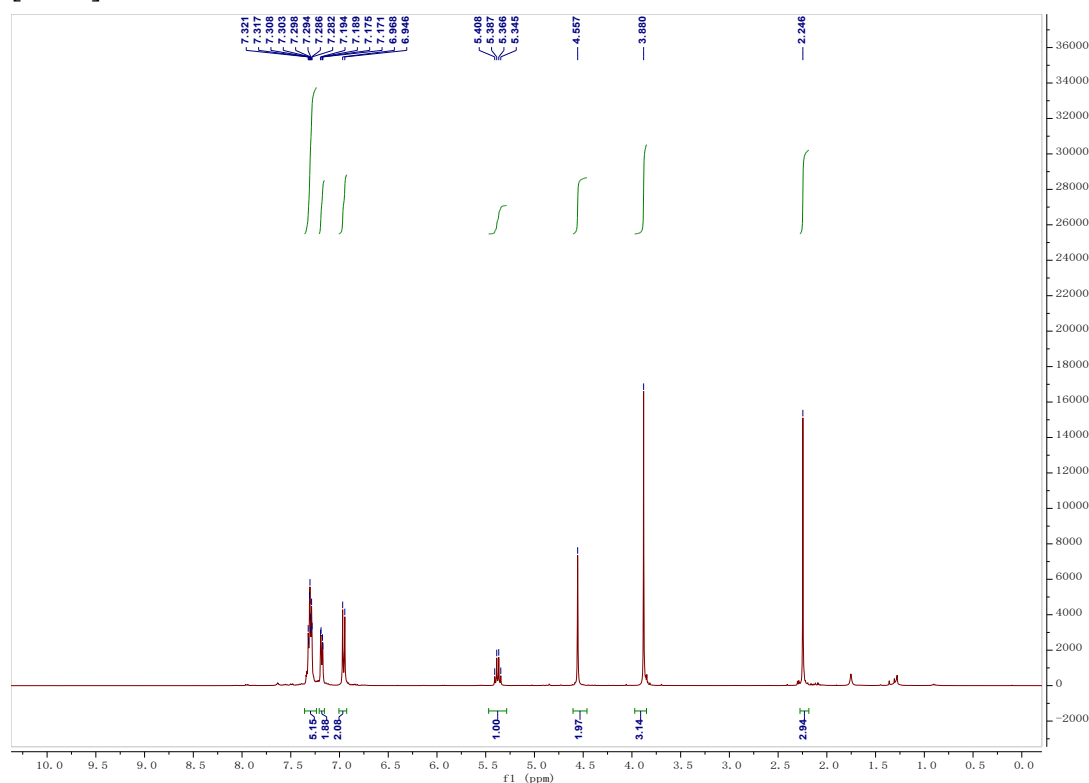

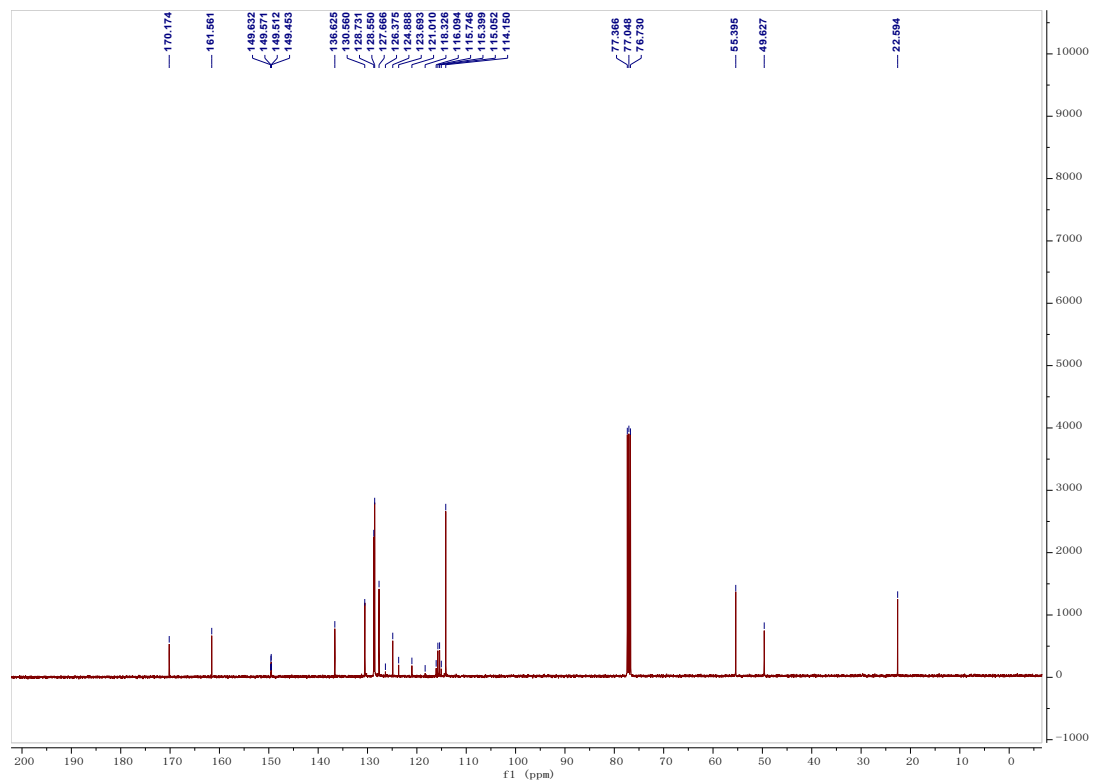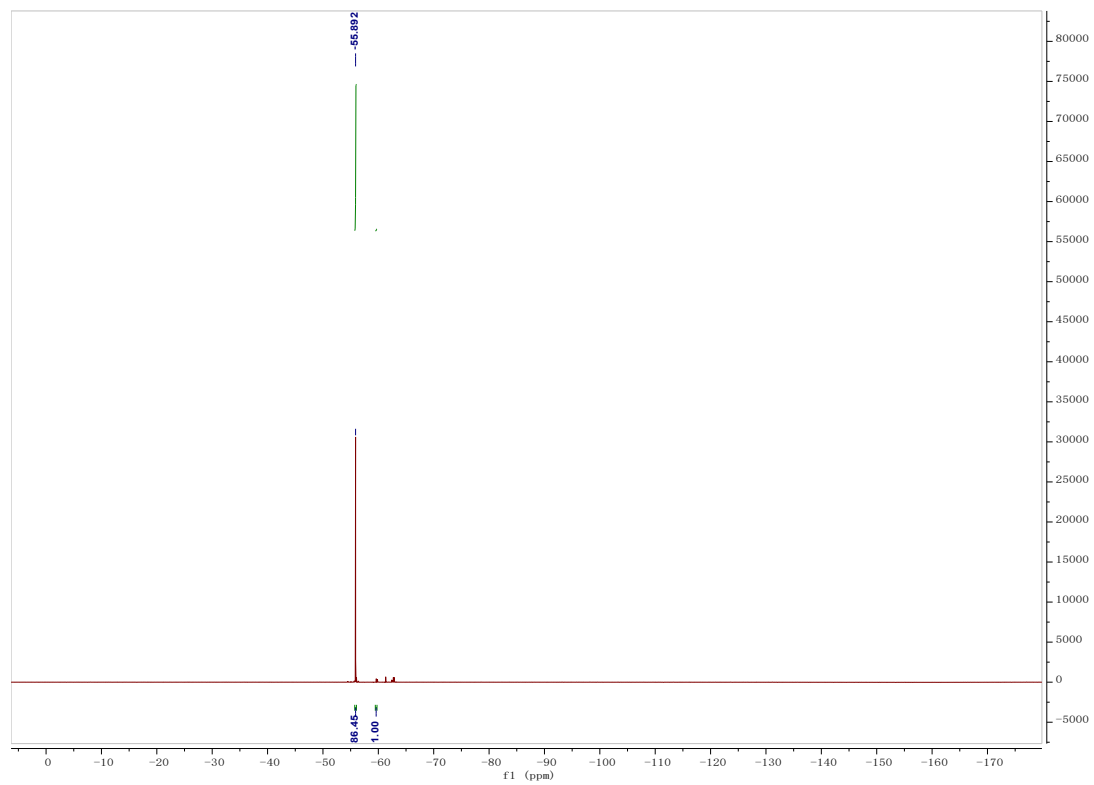

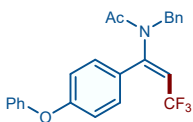

**(*E*)-*N*-benzyl-*N*-(3,3,3-trifluoro-1-(4-phenoxyphenyl) prop-1-en-1-yl) acetamide (4d)**

Following the general procedure, the compound was obtained as a colorless oil in 78% yield (E:Z >20:1, 63.9 mg);  $R_f = 0.35$  (Petroleum ether/EtOAc = 5/1).  $^1\text{H NMR}$  (400 MHz, Chloroform- $d$ )  $\delta$  7.45 – 7.41 (m, 2H), 7.35 – 7.28 (m, 5H), 7.24 – 7.19 (m, 3H), 7.13 – 7.10 (m, 2H), 7.04 – 7.01 (m, 2H), 5.43 (q,  $J = 8.0$  Hz, 1H), 4.58 (s, 2H), 2.26 (s, 3H).  $^{13}\text{C NMR}$  (101 MHz,  $\text{CDCl}_3$ )  $\delta$  170.1, 160.0, 155.7, 149.4 (q,  $J = 5.9$  Hz), 136.6, 130.7, 130.67, 130.1, 128.7, 128.6, 127.7, 126.9, 126.3 (q,  $J = 271.2$  Hz), 124.5, 120.1, 117.8, 116.8 (q,  $J = 35.2$  Hz), 49.69, 22.58.  $^{19}\text{F NMR}$  (376 MHz,  $\text{CDCl}_3$ )  $\delta$  -55.9. HRMS (ESI)  $m/z$  Calcd for  $\text{C}_{24}\text{H}_{21}\text{F}_3\text{NO}_2^+$   $[\text{M}+\text{H}]^+$ : 412.1519, Found: 412.1527.

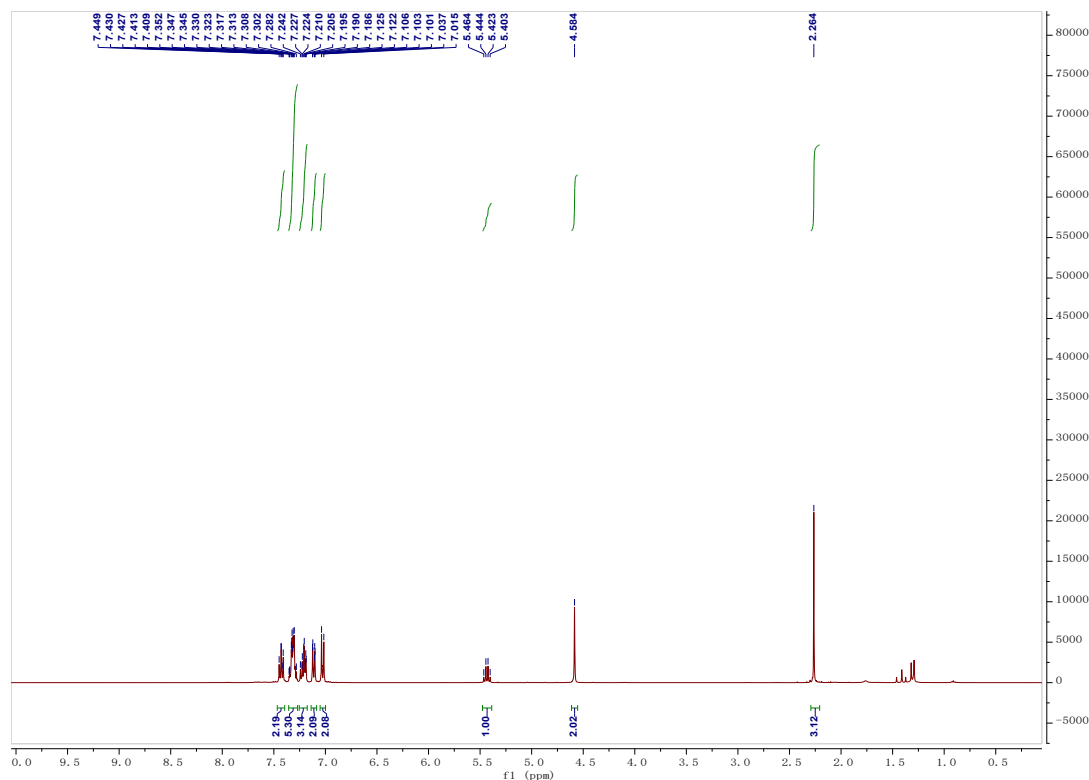

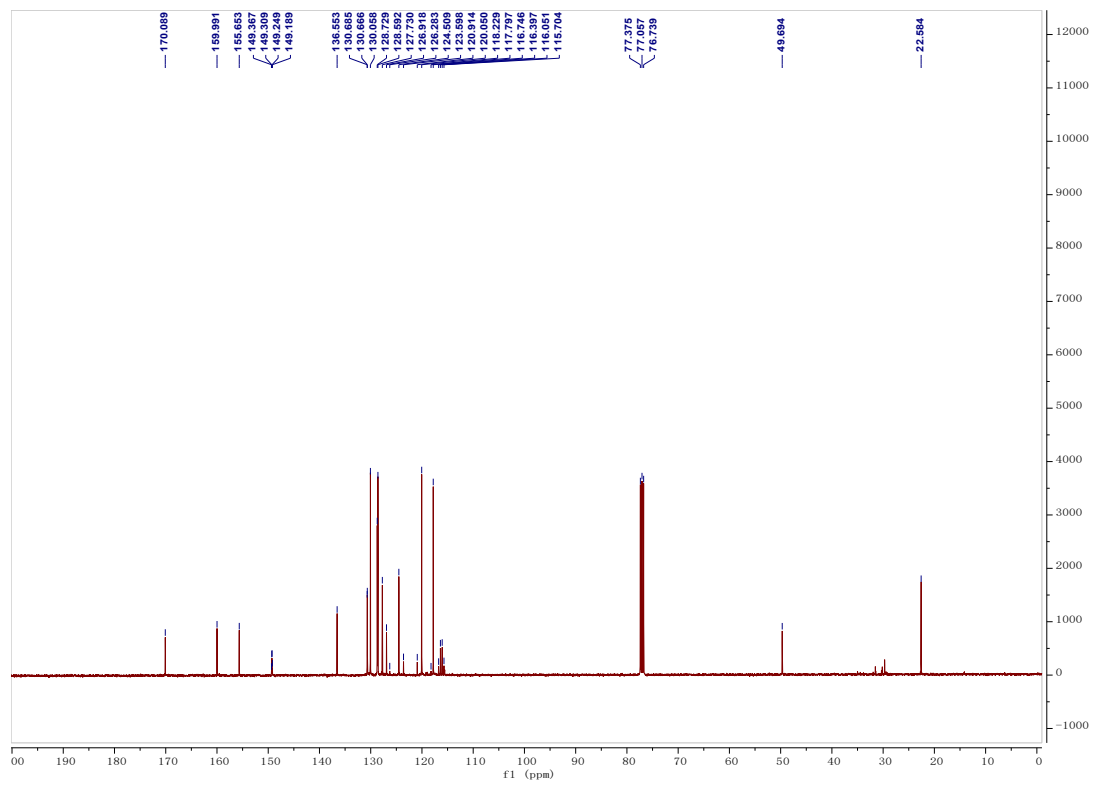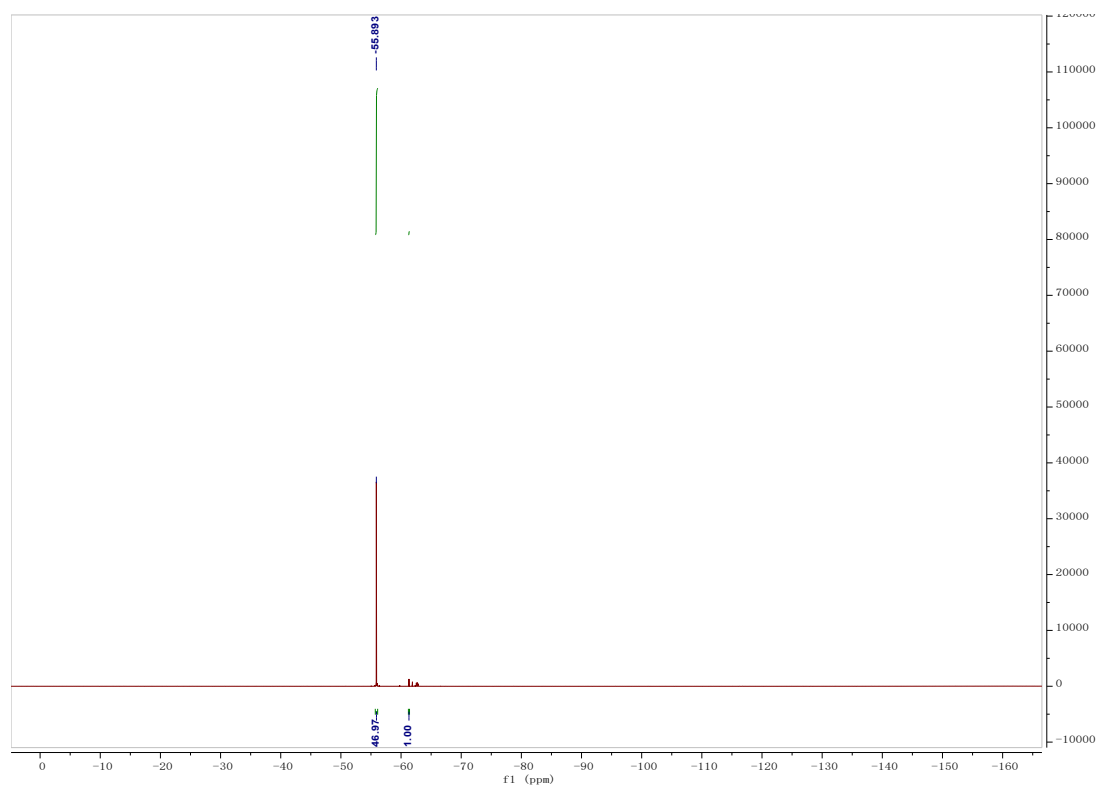

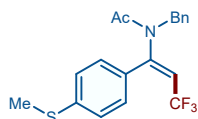

**(*E*)-*N*-benzyl-*N*-(3,3,3-trifluoro-1-(4-(methylthio)phenyl)prop-1-en-1-yl)acetamide (4e)**

Following the general procedure, the compound was obtained as a colorless oil in 30% yield (E:Z >20:1, 21.7 mg);  $R_f = 0.35$  (Petroleum ether/EtOAc = 5/1).  $^1\text{H}$  NMR (400 MHz, Chloroform- $d$ )  $\delta$  7.33 – 7.16 (m, 9H), 5.42 (q,  $J = 8.0$  Hz, 1H), 4.56 (s, 2H), 2.55 (s, 3H), 2.25 (s, 3H).  $^{13}\text{C}$  NMR (101 MHz,  $\text{CDCl}_3$ )  $\delta$  170.1, 149.3 (q,  $J = 5.9$  Hz), 142.8, 136.5, 129.2 (q,  $J = 2.0$  Hz), 128.9, 128.7, 128.6, 127.7, 125.6, 122.3 (q,  $J = 270.2$  Hz), 116.3 (q,  $J = 35.1$  Hz), 49.7, 22.6, 14.9.  $^{19}\text{F}$  NMR (376 MHz,  $\text{CDCl}_3$ )  $\delta$  -55.9. HRMS (ESI)  $m/z$  Calcd for  $\text{C}_{19}\text{H}_{19}\text{F}_3\text{NOS}^+$   $[\text{M}+\text{H}]^+$ : 366.1134, Found: 366.1142.

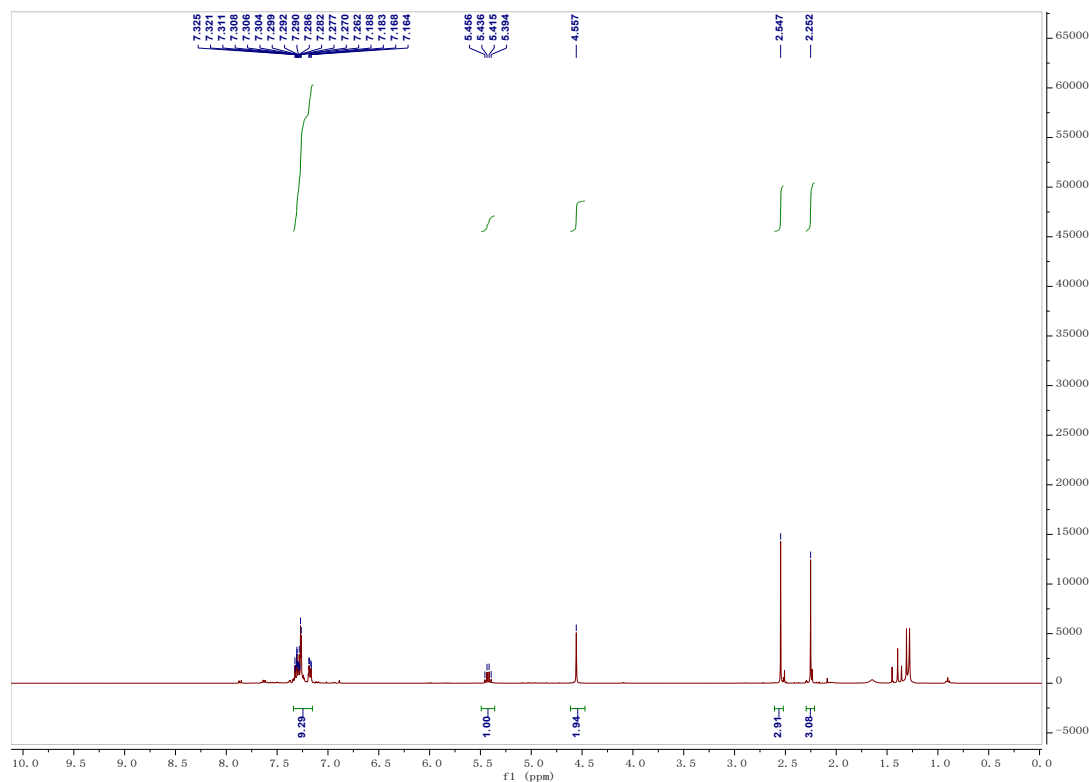

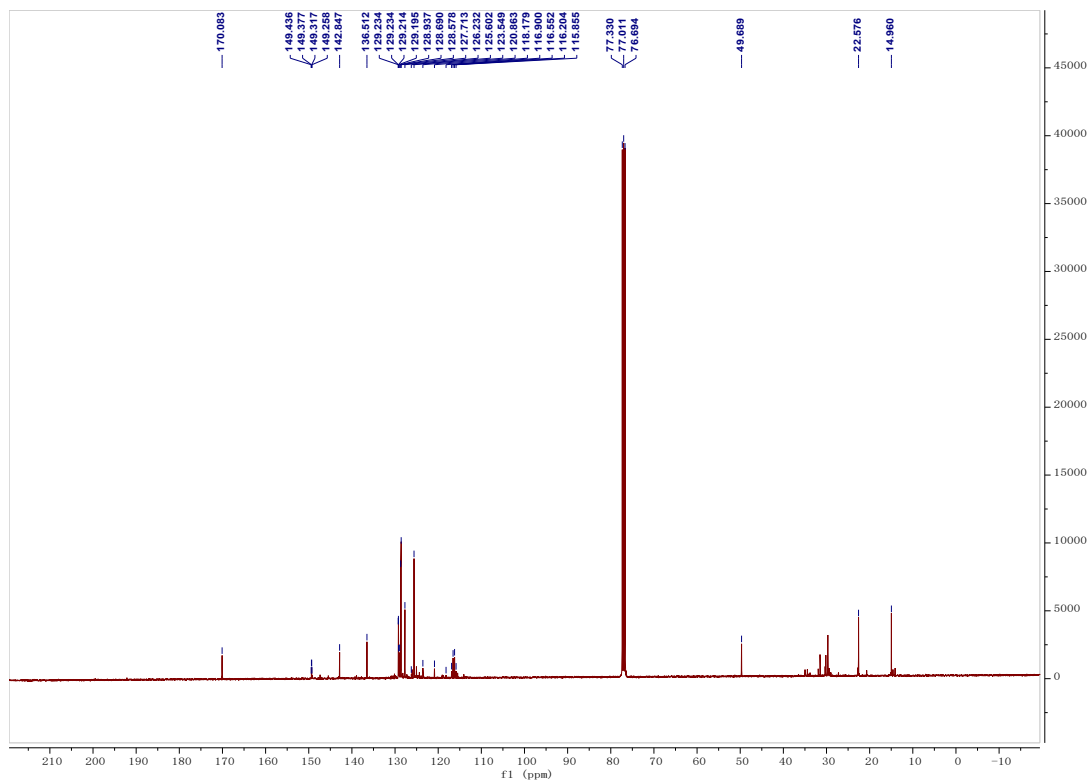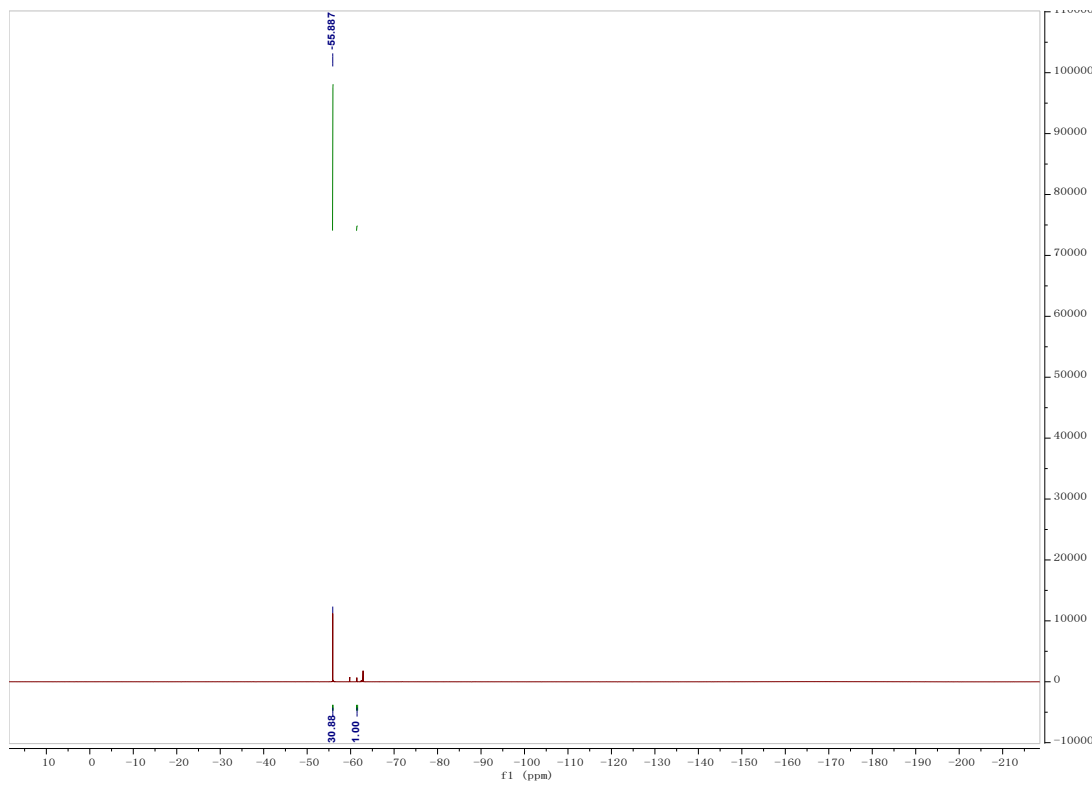

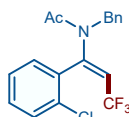

***N*-benzyl-*N*-(1-(2-chlorophenyl)-3,3,3-trifluoroprop-1-en-1-yl) acetamide (4f)**

Following the general procedure, the compound was obtained as a colorless oil in 38% yield (*E/Z* mixture (1:1.2), 27.0 mg);  $R_f = 0.35$  (Petroleum ether/EtOAc = 5/1).  $^1\text{H NMR}$  (400 MHz, Chloroform-*d*)  $\delta$  8.11 – 7.47 (m, 18H), 6.35 (q,  $J = 8.0$  Hz, 1H), 5.68 (q,  $J = 8.0$  Hz, 1H), 4.93 – 4.89 (m, 2H), 2.49 (s, 2.5H), 2.32 (s, 3H).  $^{13}\text{C NMR}$  (101 MHz,  $\text{CDCl}_3$ )  $\delta$  170.0, 143.8 (q,  $J = 5.6$  Hz), 143.3 (q,  $J = 5.5$  Hz), 140.9, 140.1, 139.2, 139.1, 138.6, 136.3, 136.2, 135.2, 130.3, 129.01, 128.7, 128.4, 128.1, 128.0, 127.3, 126.7, 126.5, 125.3, 125.2, 125.0, 124.9, 123.2 (q,  $J = 271.7$  Hz), 123.1 (q,  $J = 271.2$  Hz), 122.5, 122.4, 118.6 (q,  $J = 35.9$  Hz), 114.6 (q,  $J = 34.4$  Hz), 52.3, 50.1, 22.4, 21.8.  $^{19}\text{F NMR}$  (376 MHz,  $\text{CDCl}_3$ )  $\delta$  -56.5, 59.5. HRMS (ESI)  $m/z$  Calcd for  $\text{C}_{18}\text{H}_{16}\text{ClF}_3\text{NO}^+$   $[\text{M}+\text{H}]^+$ : 354.0867, Found: 354.0876.

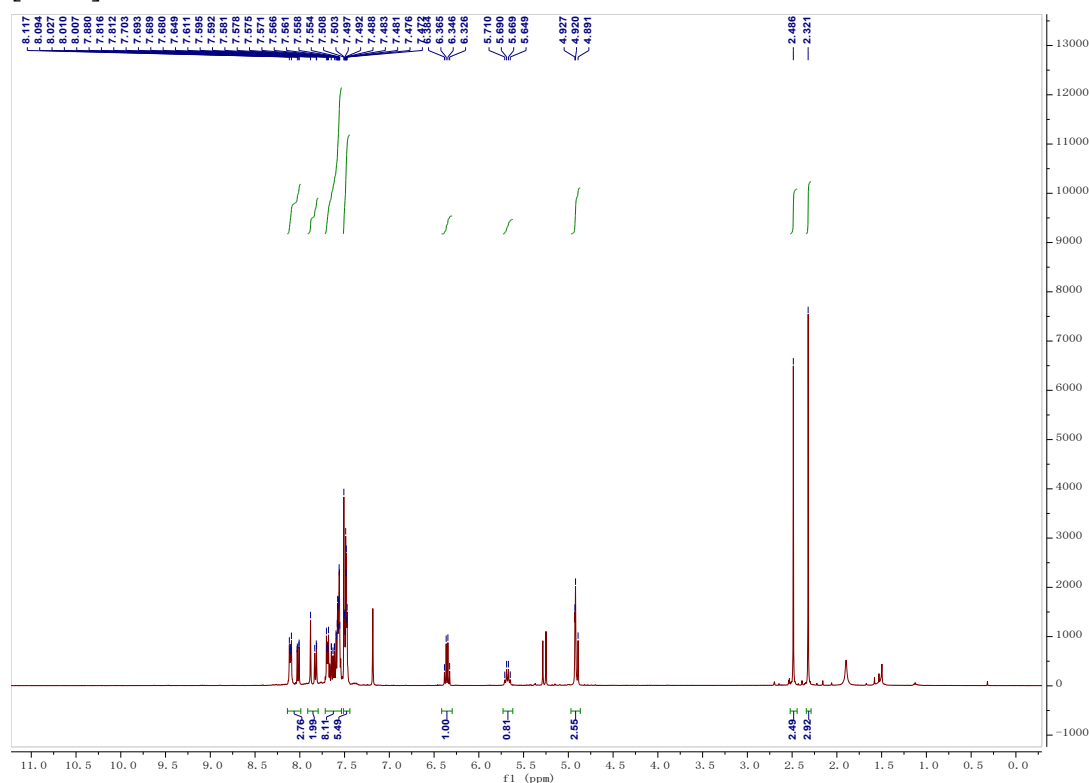

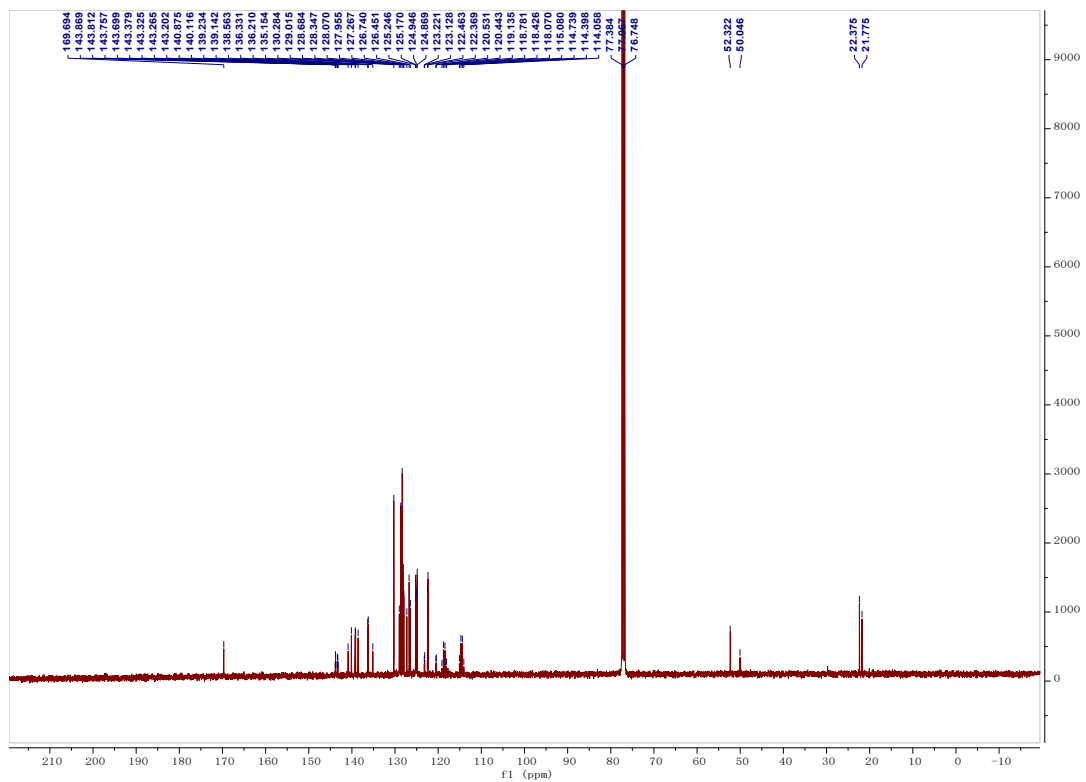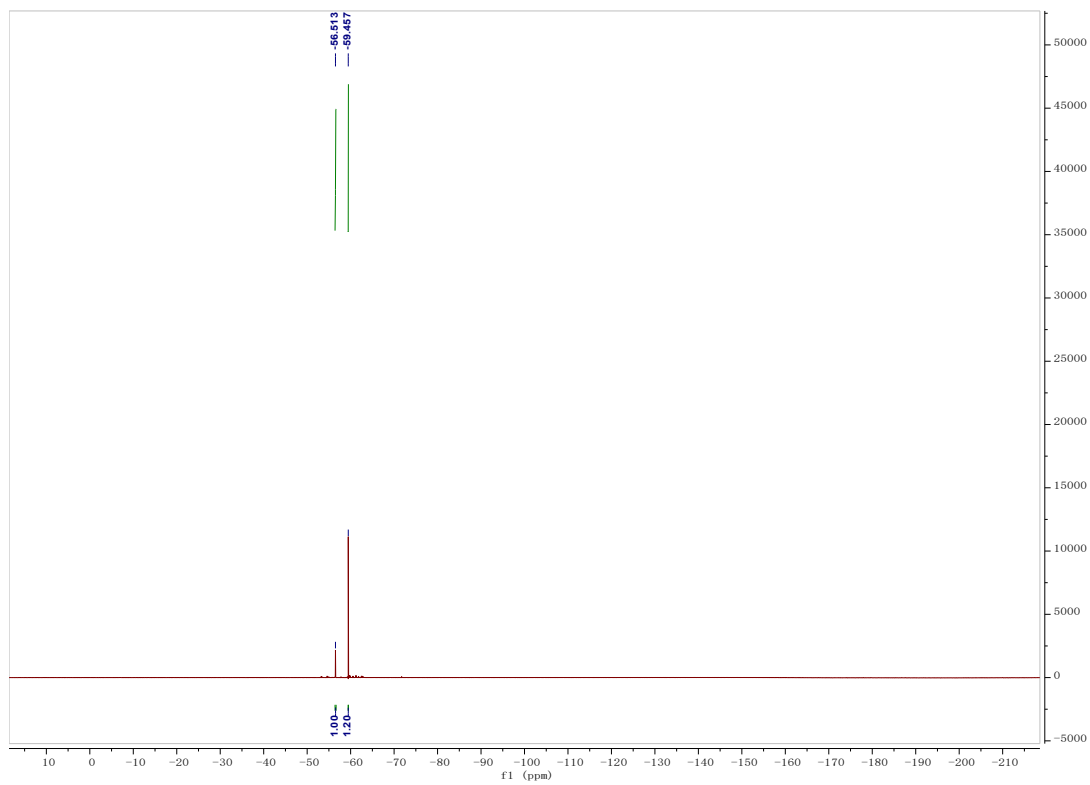



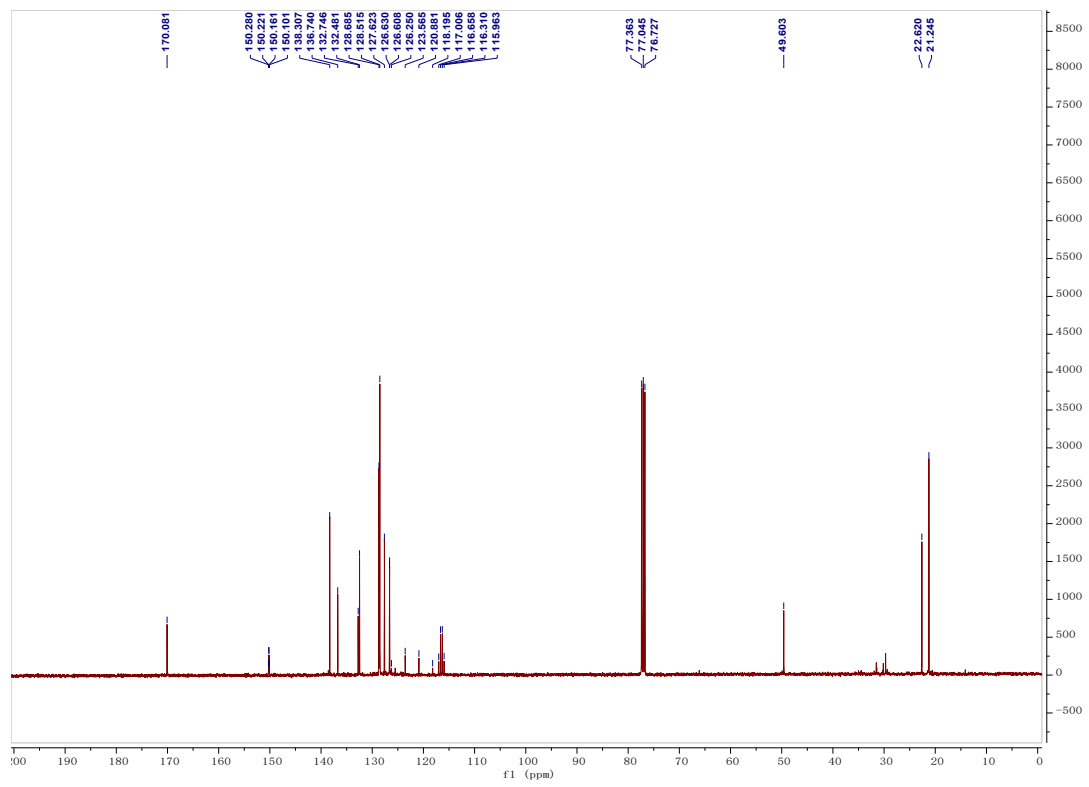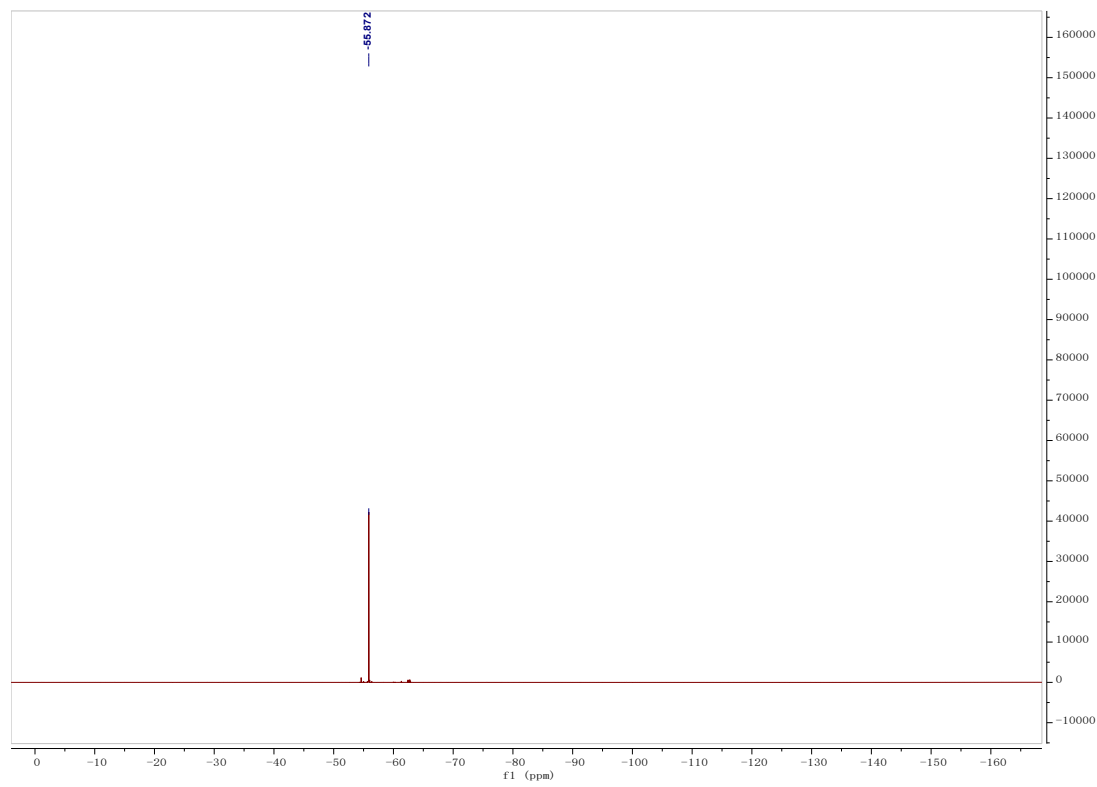

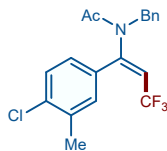

**(*E*)-*N*-benzyl-*N*-(1-(4-chloro-3-methylphenyl)-3,3,3-trifluoroprop-1-en-1-yl)acetamide (4h)**

Following the general procedure, the compound was obtained as a colorless oil in 79% yield (E:Z >20:1, 58.0 mg);  $R_f = 0.20$  (Petroleum ether/EtOAc = 5/1).  $^1\text{H}$  NMR (400 MHz, Chloroform- $d$ )  $\delta$  7.41 (d,  $J = 8.0$  Hz, 1H), 7.35 – 7.28 (m, 3H), 7.18 – 7.11 (m, 4H), 5.49 (q,  $J = 8.2$  Hz, 1H), 4.55 (s, 2H), 2.41 (s, 3H), 2.26 (s, 3H).  $^{13}\text{C}$  NMR (101 MHz,  $\text{CDCl}_3$ )  $\delta$  170.0, 149.0 (q,  $J = 5.8$  Hz), 137.2, 136.8, 136.4, 131.4, 131.0, 129.4, 128.6, 127.8, 126.1 (q,  $J = 271.2$  Hz), 117.6 (q,  $J = 35.1$  Hz), 49.7, 22.6, 20.1.  $^{19}\text{F}$  NMR (376 MHz,  $\text{CDCl}_3$ )  $\delta$  -55.9. HRMS (ESI)  $m/z$  Calcd for  $\text{C}_{19}\text{H}_{18}\text{ClF}_3\text{NO}^+$   $[\text{M}+\text{H}]^+$ : 368.1024, Found: 368.1032.

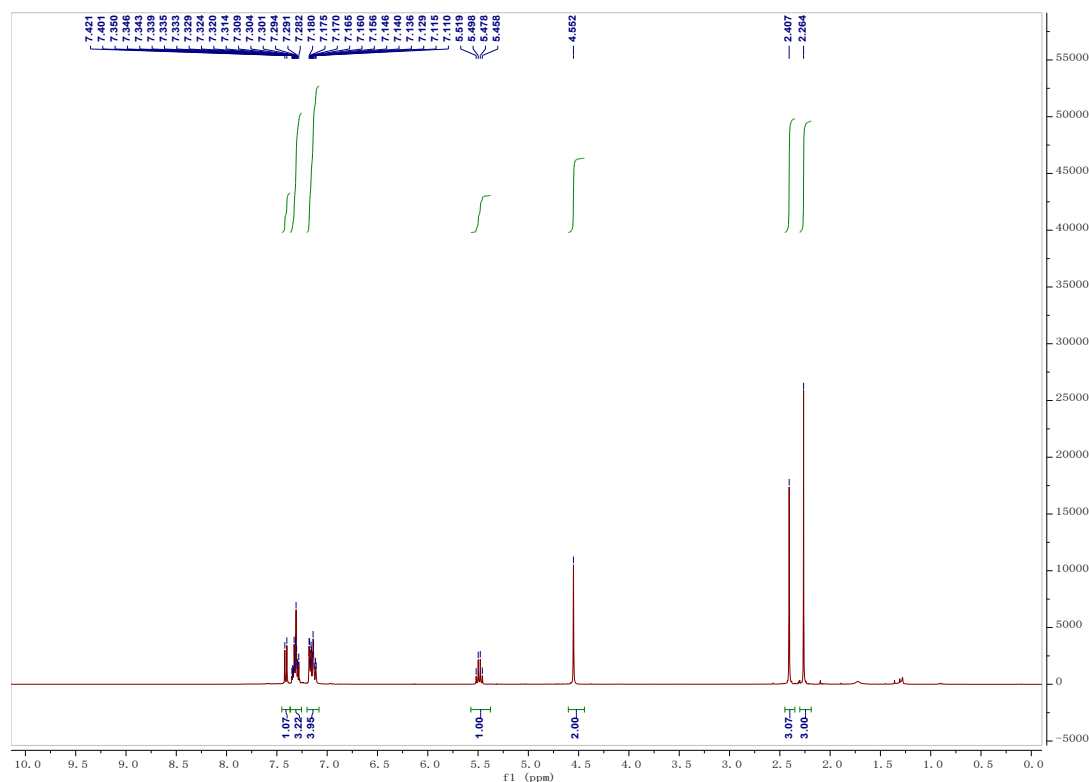

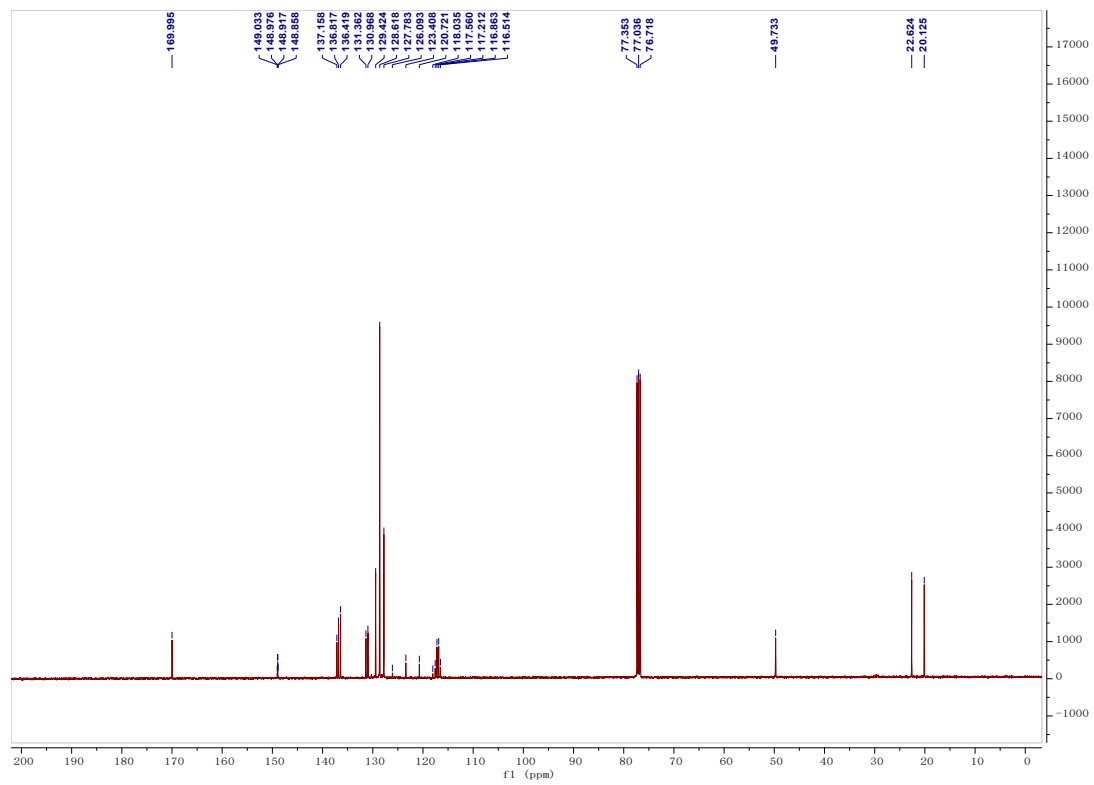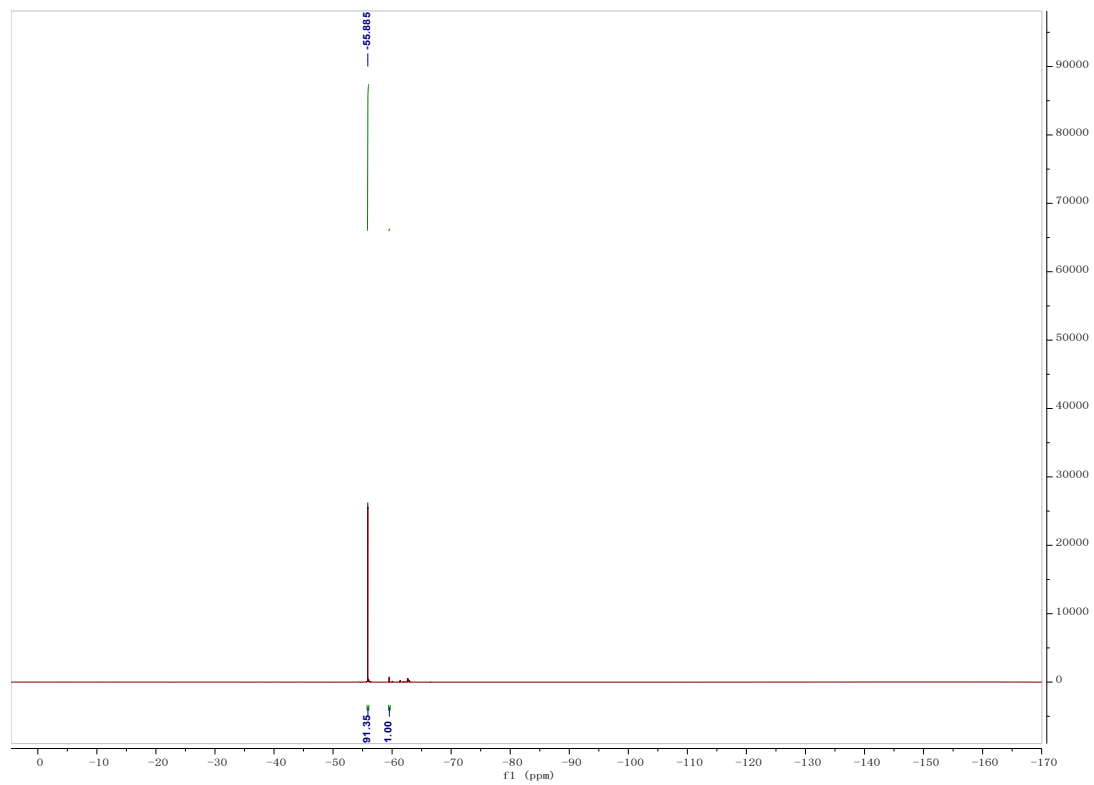

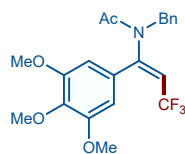

**(*E*)-*N*-benzyl-*N*-(3,3,3-trifluoro-1-(3,4,5-trimethoxyphenyl)prop-1-en-1-yl)acetamide (4i)**

Following the general procedure, the compound was obtained as a yellow oil in 80% yield (E:Z >20:1, 65.3 mg);  $R_f = 0.20$  (Petroleum ether/EtOAc = 5/1).  $^1\text{H}$  NMR (400 MHz, Chloroform- $d$ )  $\delta$  7.34 – 7.28 (m, 3H), 7.22 – 7.20 (m, 2H), 6.48 (s, 2H), 5.51 (q,  $J = 8.0$  Hz, 1H), 4.64 (s, 2H), 3.91 (s, 3H), 3.80 (s, 6H), 2.21 (s, 3H).  $^{13}\text{C}$  NMR (101 MHz,  $\text{CDCl}_3$ )  $\delta$  170.3, 153.2, 150.3 (q,  $J = 6.0$  Hz), 140.2, 136.7, 128.8, 128.6, 128.1, 127.8, 126.4 (q,  $J = 271.1$  Hz), 116.3 (q,  $J = 35.1$  Hz), 106.3, 106.2, 61.0, 56.2, 50.4, 22.8.  $^{19}\text{F}$  NMR (376 MHz,  $\text{CDCl}_3$ )  $\delta$  -55.4. HRMS (ESI)  $m/z$  Calcd for  $\text{C}_{21}\text{H}_{23}\text{F}_3\text{NO}_4^+$   $[\text{M}+\text{H}]^+$ : 410.1574, Found: 410.1583.

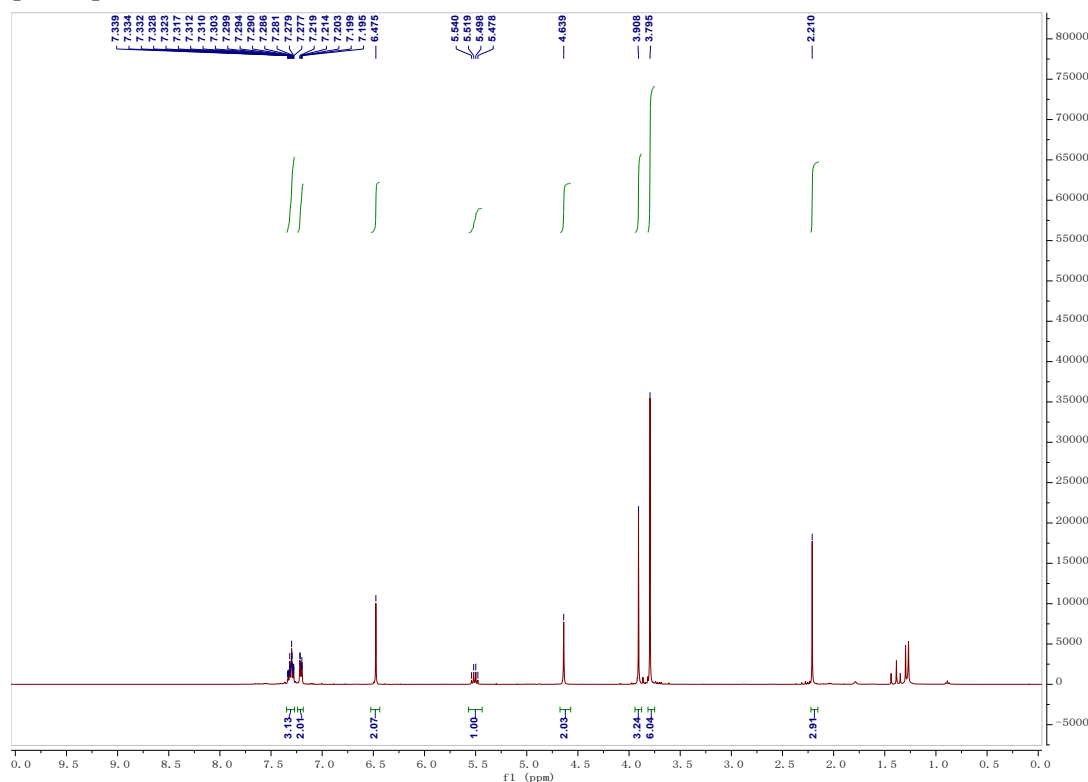

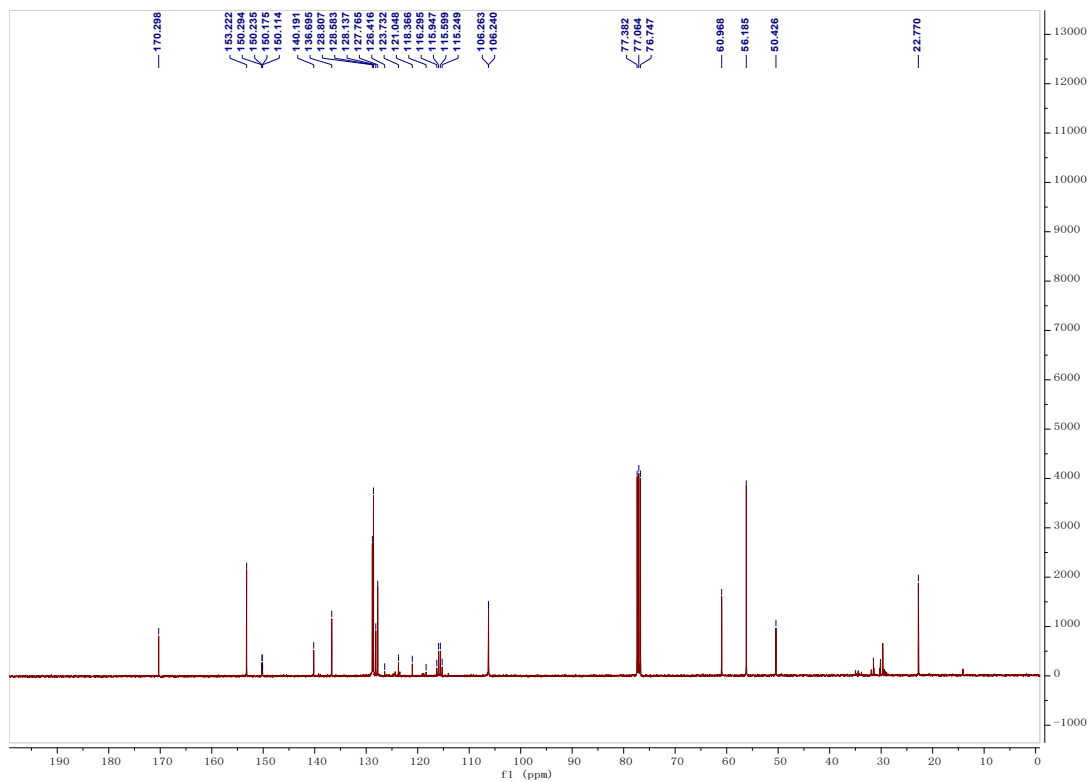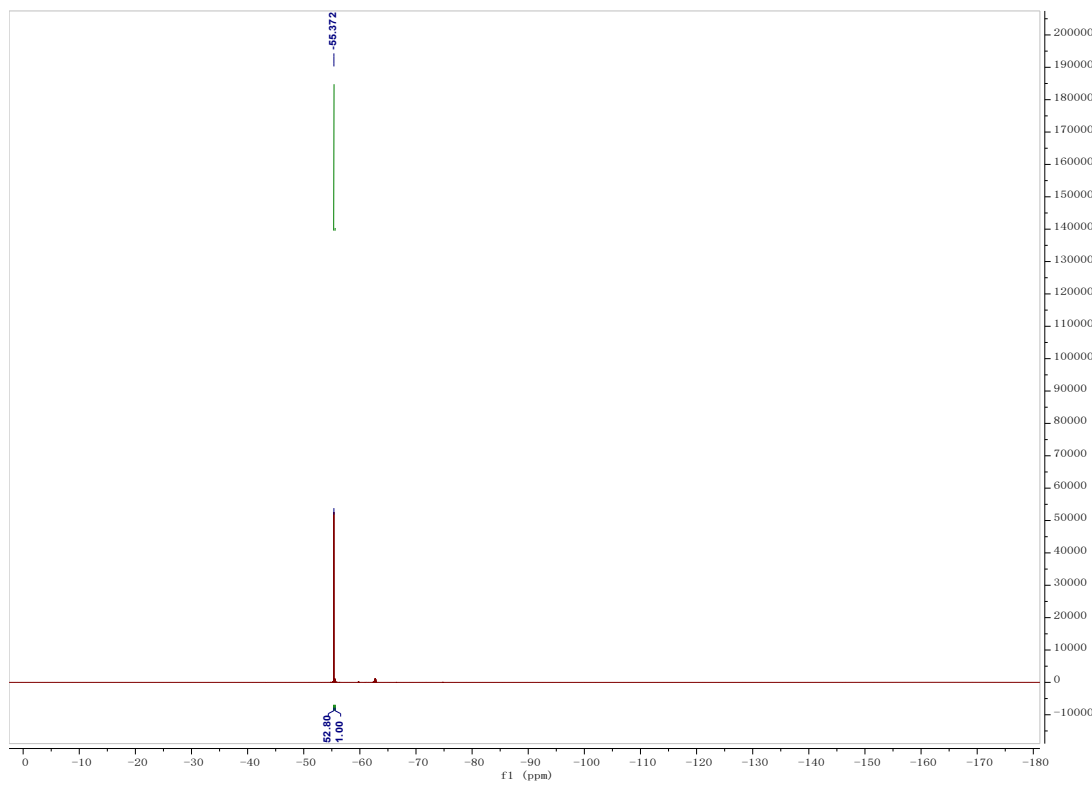

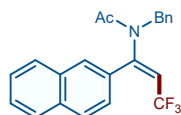

**(*E*)-*N*-benzyl-*N*-(3,3,3-trifluoro-1-(naphthalen-2-yl) prop-1-en-1-yl) acetamide (4j)**

Following the general procedure, the compound was obtained as a colorless oil in 46% yield (E:Z >20:1, 33.6 mg);  $R_f = 0.35$  (Petroleum ether/EtOAc = 5/1).  $^1\text{H NMR}$  (400 MHz, Chloroform- $d$ )  $\delta$  7.93 – 7.84 (m, 4H), 7.64 – 7.57 (m, 2H), 7.42 (dd,  $J = 8.6, 1.8$  Hz, 1H), 7.36 – 7.31 (m, 3H), 7.21 – 7.19 (m, 2H), 5.58 (q,  $J = 8.0$  Hz, 1H), 4.59 (s, 2H), 2.34 (s, 3H).  $^{13}\text{C NMR}$  (101 MHz,  $\text{CDCl}_3$ )  $\delta$  170.2, 149.9 (q,  $J = 6.1$  Hz), 136.6, 134.2, 132.7, 130.2, 129.5, 128.7, 128.6, 127.8, 127.75, 127.0, 125.2, 123.6 (q,  $J = 271.7$  Hz), 117.6 (q,  $J = 35.4$  Hz), 49.7, 22.7.  $^{19}\text{F NMR}$  (376 MHz,  $\text{CDCl}_3$ )  $\delta$  -55.8. HRMS (ESI)  $m/z$  Calcd for  $\text{C}_{22}\text{H}_{19}\text{F}_3\text{NO}^+$   $[\text{M}+\text{H}]^+$ : 370.1413, Found: 370.1422.

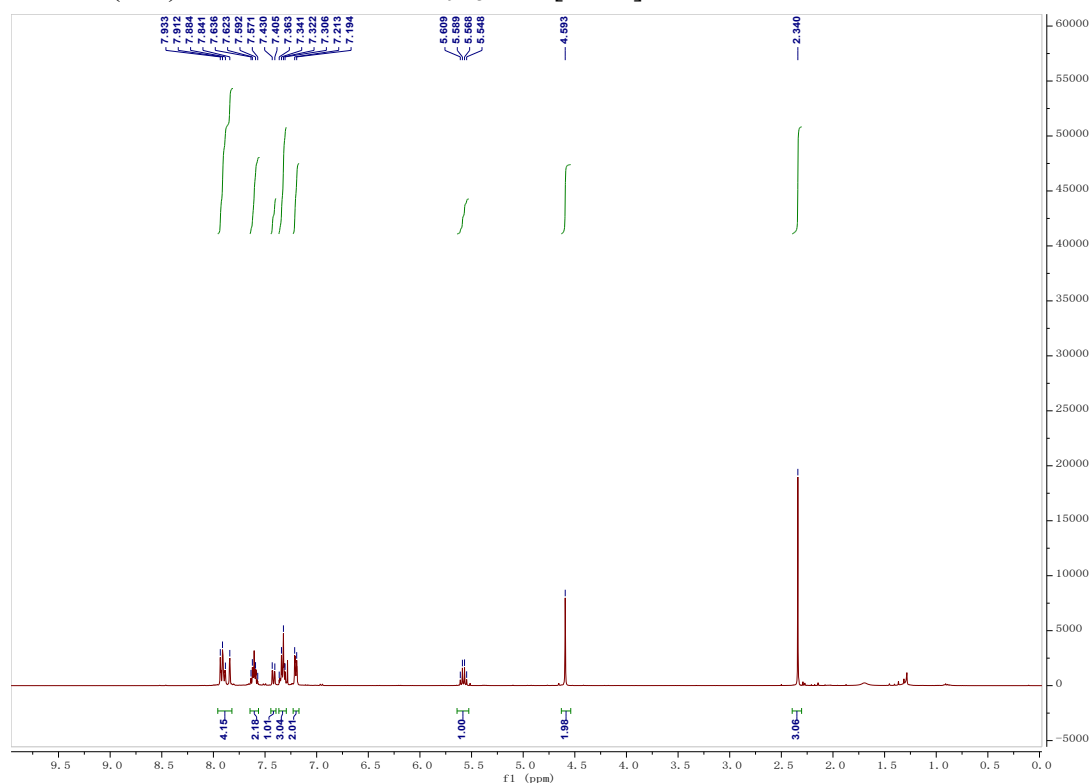

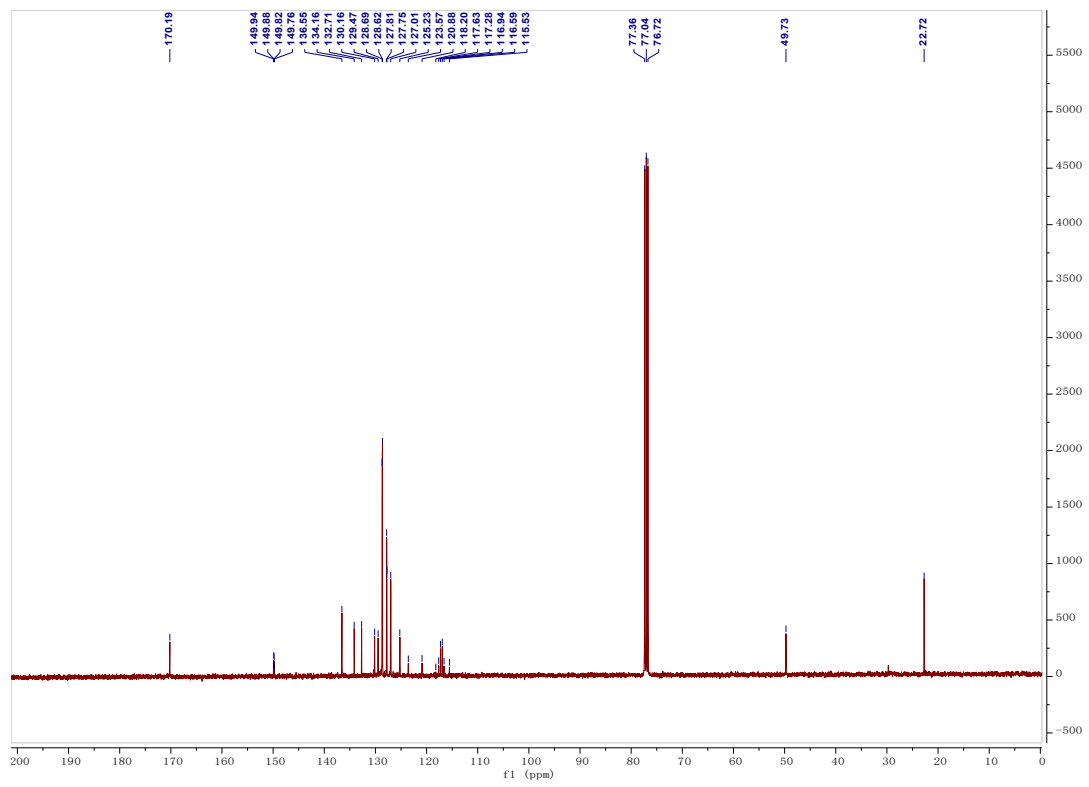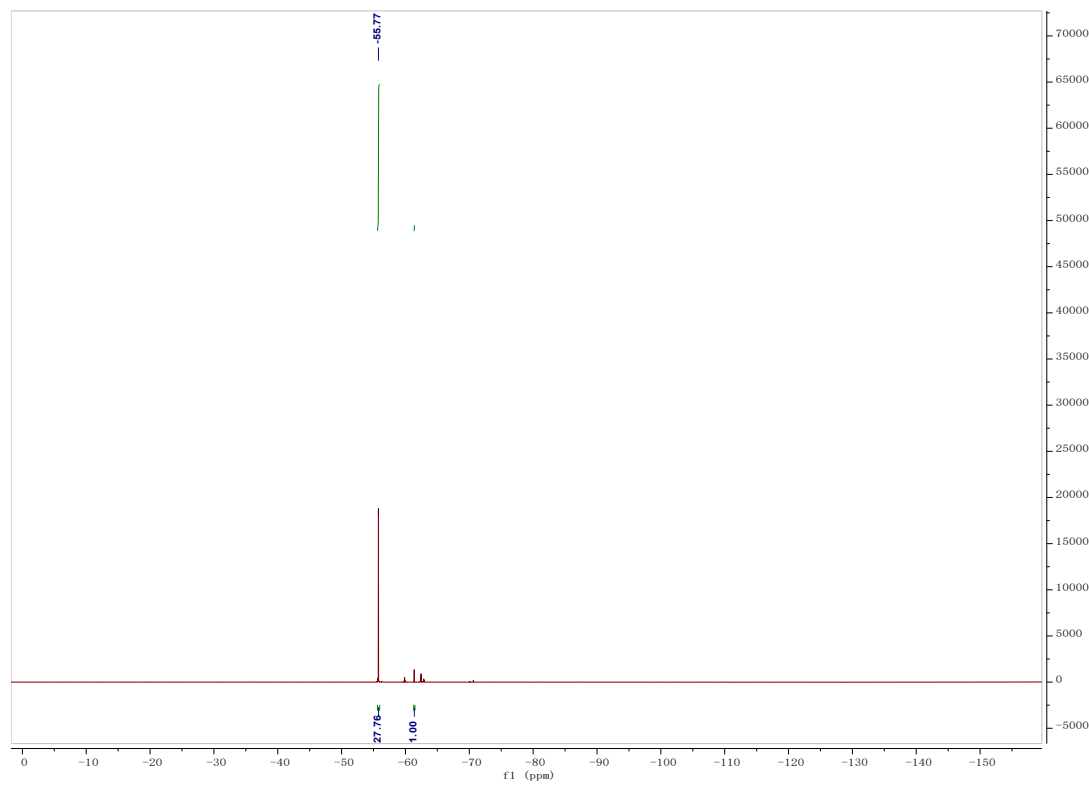



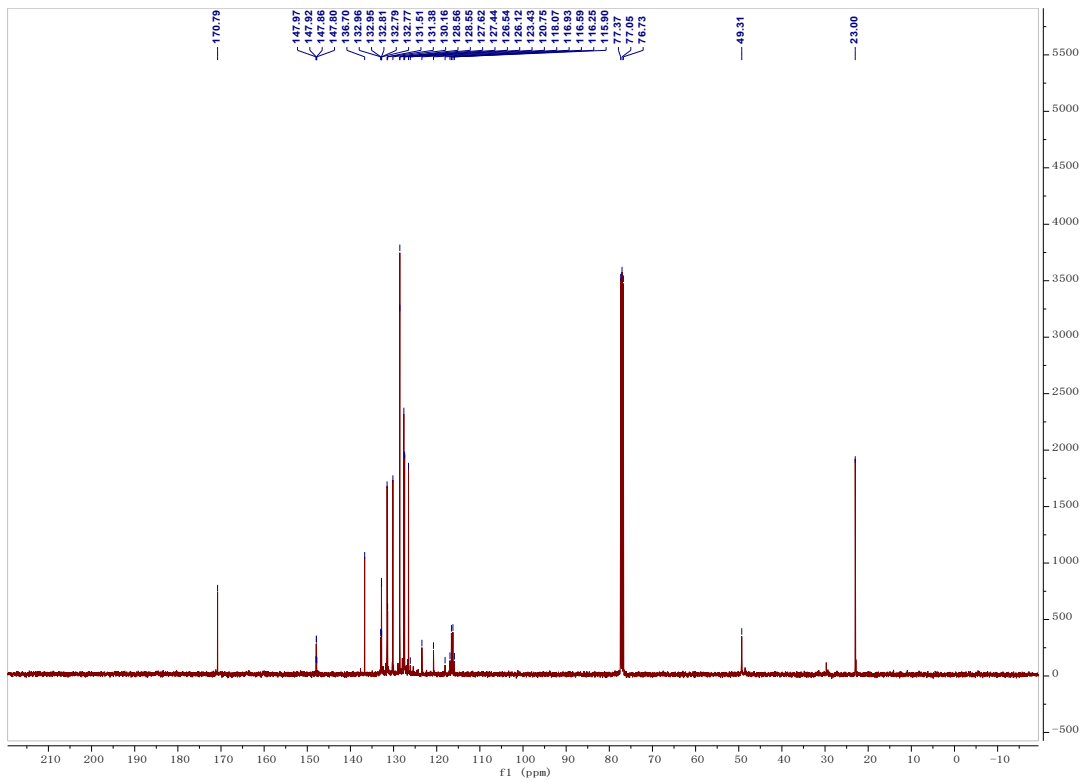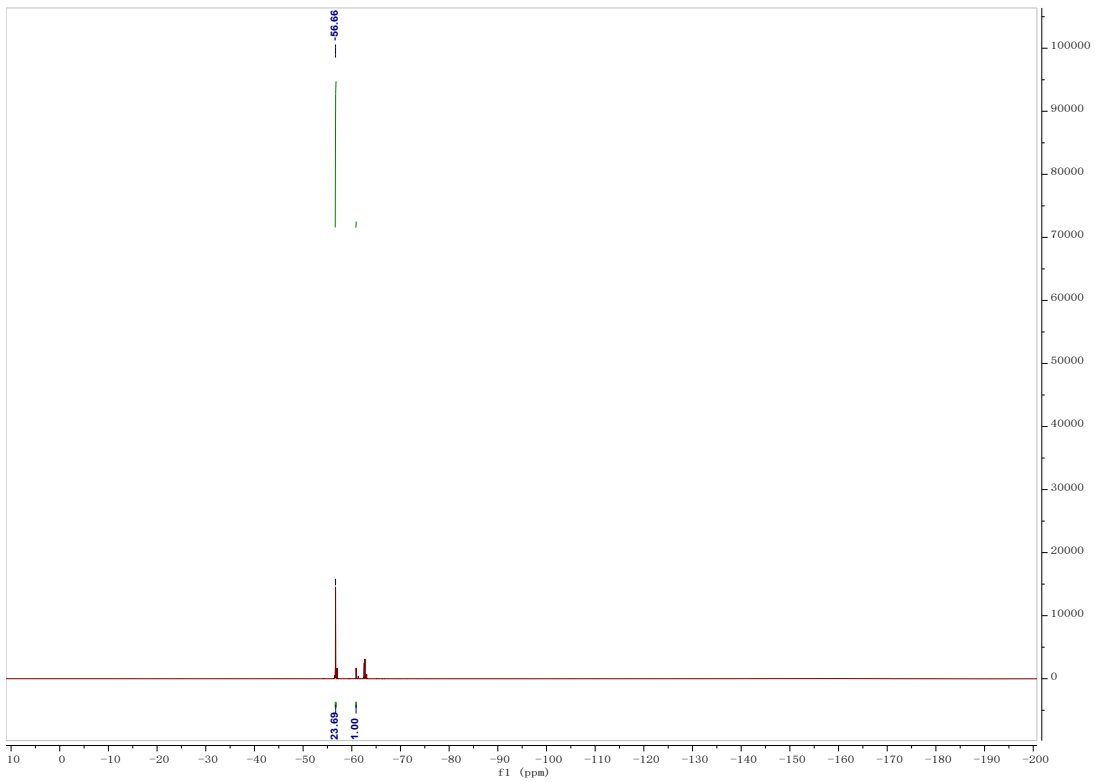

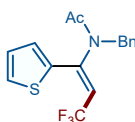

**(E)-N-benzyl-N-(3,3,3-trifluoro-1-(thiophen-2-yl) prop-1-en-1-yl) acetamide (4l)**

Following the general procedure, the compound was obtained as a colorless oil in 74% yield (E:Z = 10:1, 50.0 mg);  $R_f = 0.25$  (Petroleum ether/EtOAc = 5/1).  $^1\text{H}$  NMR (400 MHz, Chloroform- $d$ )  $\delta$  7.57 (dd,  $J = 5.2, 1.2$  Hz, 1H), 7.43 – 7.42 (m, 1H), 7.34 – 7.30 (m, 3H), 7.27 – 7.24 (m, 2H), 7.14 (dd,  $J = 4.8, 4.0$  Hz, 1H), 5.33 (q,  $J = 8.4$  Hz, 1H), 4.67 (s, 2H), 2.19 (s, 3H).  $^{13}\text{C}$  NMR (101 MHz,  $\text{CDCl}_3$ )  $\delta$  169.7, 143.1(q,  $J = 6.3$  Hz), 136.5, 135.7, 131.6 (q,  $J = 3.3$  Hz), 130.2, 129.1, 128.6, 128.3, 127.9, 126.0 (q,  $J = 271.4$  Hz), 117.3 (q,  $J = 36.0$  Hz), 50.3, 22.2.  $^{19}\text{F}$  NMR (376 MHz,  $\text{CDCl}_3$ )  $\delta$  -57.0. HRMS (ESI)  $m/z$  Calcd for  $\text{C}_{16}\text{H}_{15}\text{F}_3\text{NOS}^+$   $[\text{M}+\text{H}]^+$ : 326.0821, Found: 326.0830.

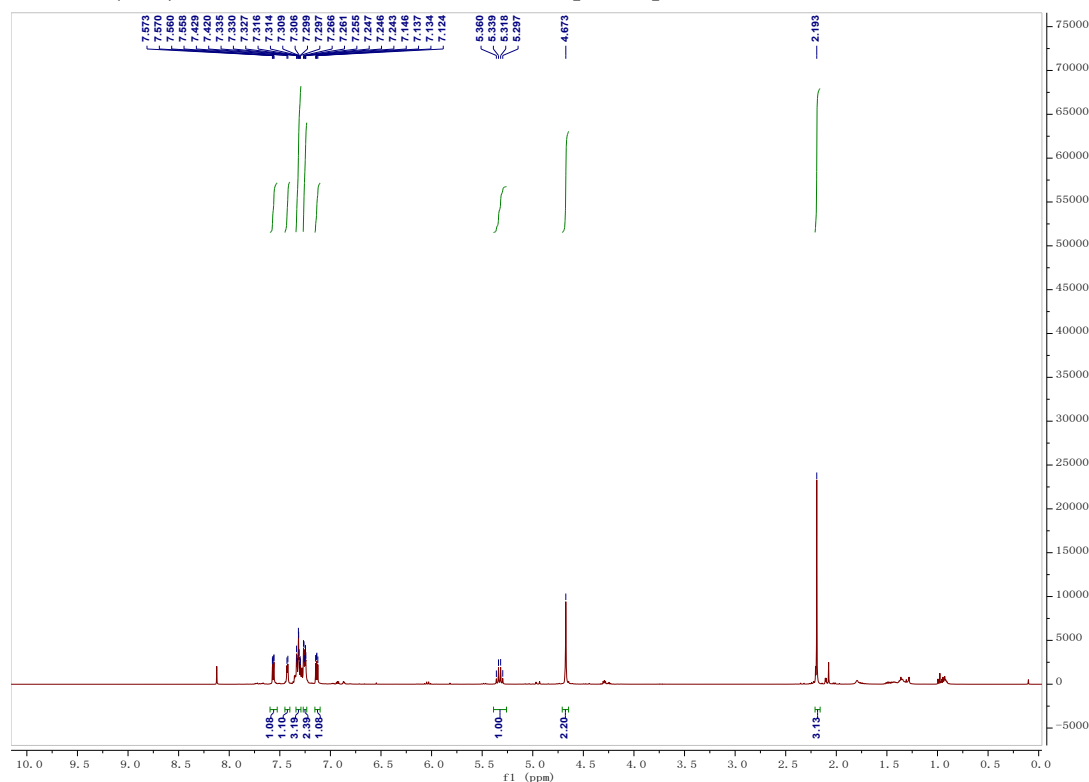

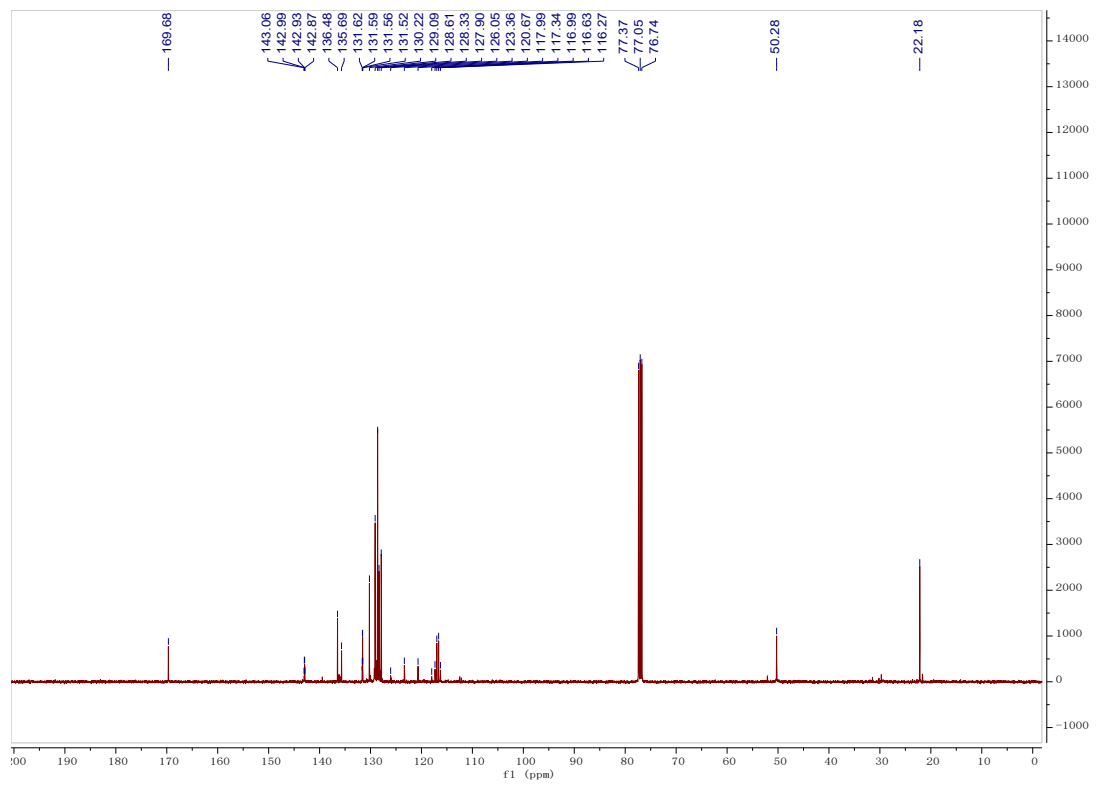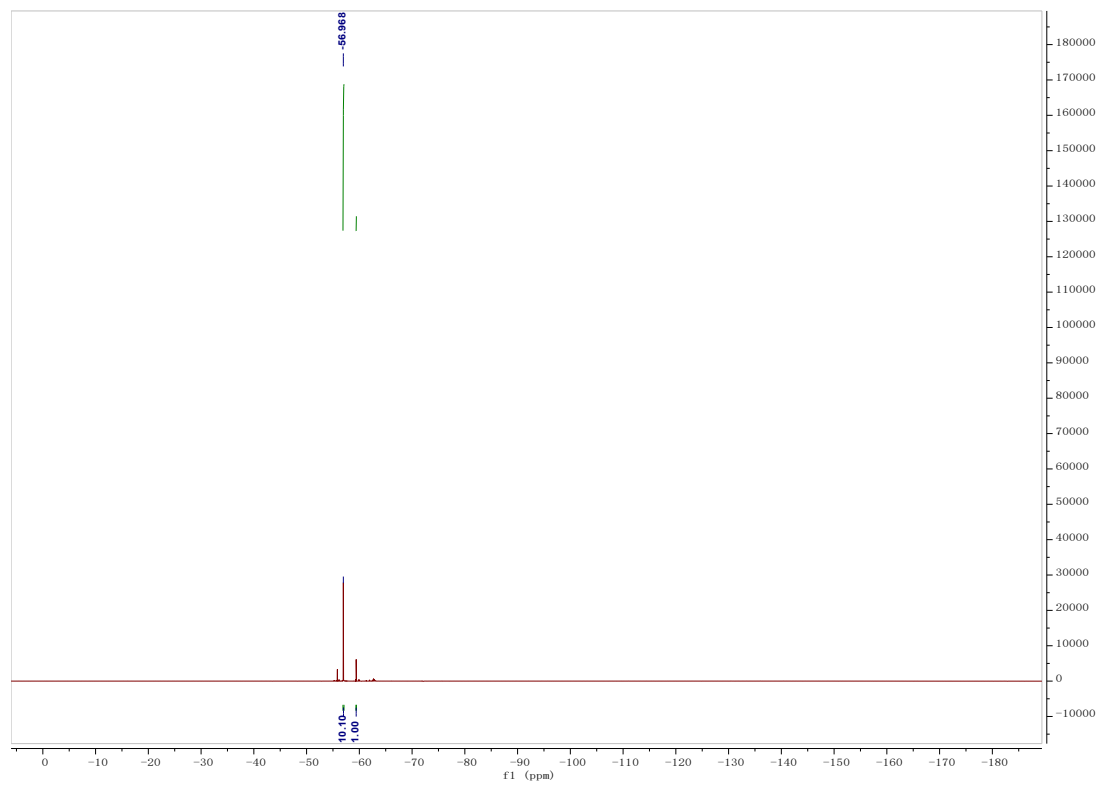

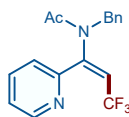

**(E)-N-benzyl-N-(3,3,3-trifluoro-1-(pyridin-2-yl) prop-1-en-1-yl) acetamide (4m)**

Following the general procedure, the compound was obtained as a colorless oil in 63% yield (E:Z >20:1, 39.3 mg);  $R_f = 0.25$  (Petroleum ether/EtOAc = 3/1).  $^1\text{H NMR}$  (400 MHz, Chloroform- $d$ )  $\delta$  8.72 – 8.71 (m, 1H), 7.74 (tt,  $J = 7.6, 2.0$  Hz, 1H), 7.38 – 7.27 (m, 5H), 7.22 – 7.20 (m, 2H), 5.64 (q,  $J = 8.2$  Hz, 1H), 4.62 (s, 2H), 2.25 (s, 3H).  $^{13}\text{C NMR}$  (101 MHz,  $\text{CDCl}_3$ )  $\delta$  170.5, 151.7, 150.0, 149.1 (q,  $J = 5.9$  Hz), 136.6, 136.3, 128.6, 128.5, 127.7, 126.0 (q,  $J = 271.3$  Hz), 124.8, 124.6, 119.21 (q,  $J = 36.2$  Hz), 50.3, 22.6.  $^{19}\text{F NMR}$  (376 MHz,  $\text{CDCl}_3$ )  $\delta$  -56.5. HRMS (ESI)  $m/z$  Calcd for  $\text{C}_{17}\text{H}_{16}\text{F}_3\text{N}_2\text{O}^+$   $[\text{M}+\text{H}]^+$ : 321.1209, Found: 321.1219.

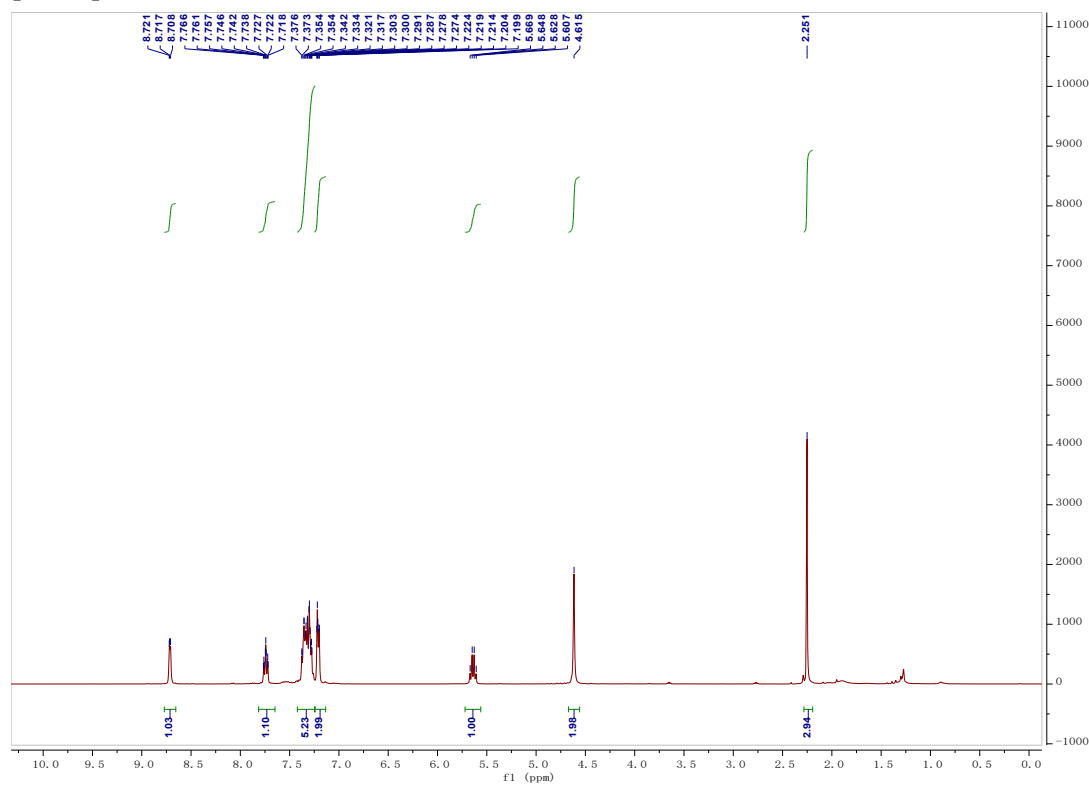

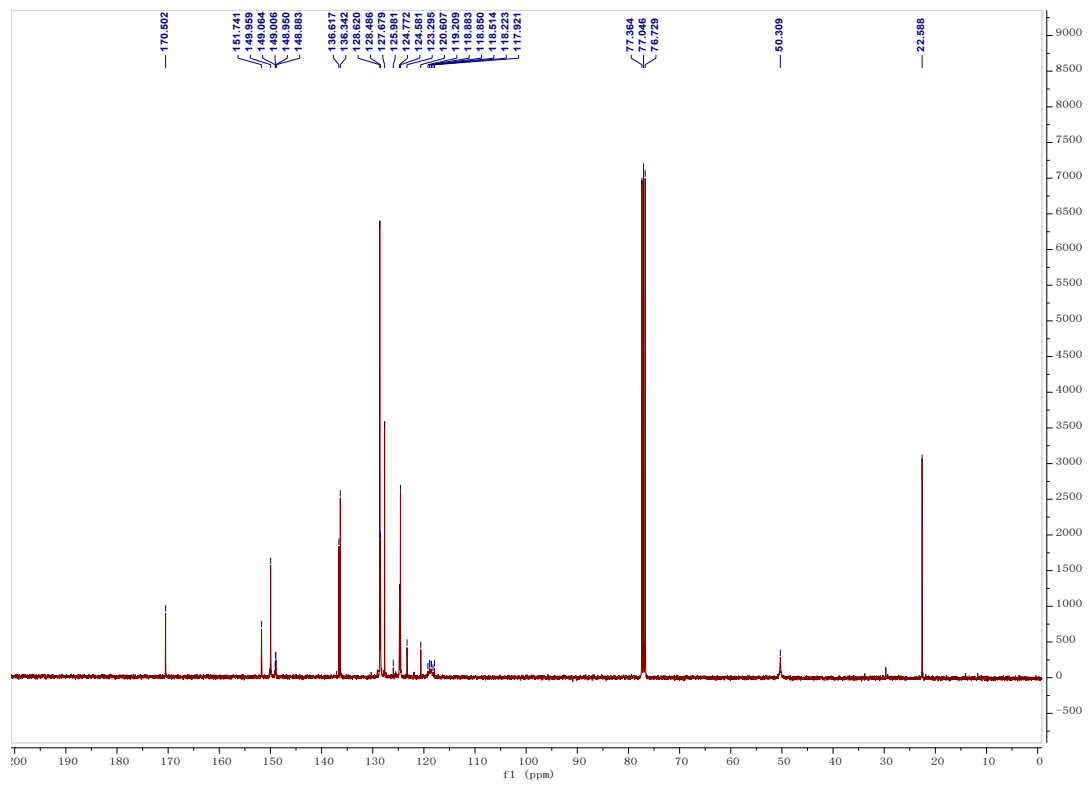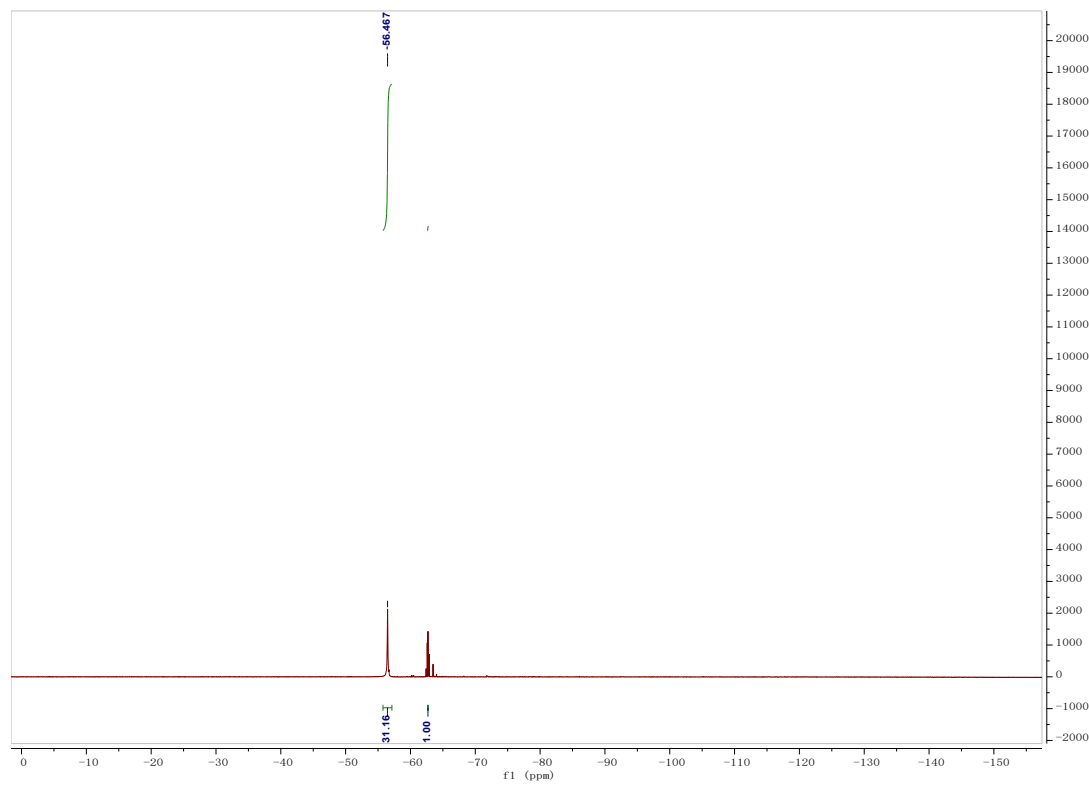

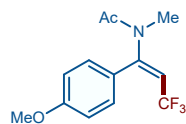

**(*E*)-*N*-methyl-*N*-(3,3,3-trifluoro-1-(4-methoxyphenyl) prop-1-en-1-yl) acetamide (4n)**

Following the general procedure, the compound was obtained as a colorless oil in 68% yield (E:Z = 10:1, 37.0 mg);  $R_f = 0.20$  (Petroleum ether/EtOAc = 3/1).  $^1\text{H}$  NMR (400 MHz, Chloroform- $d$ )  $\delta$  7.34 (d,  $J = 8.2$  Hz, 2H), 6.95 ((d,  $J = 9.2$  Hz, 2H)), 5.63 (q,  $J = 8.2$  Hz, 1H), 3.87 (s, 3H), 2.99 (s, 3H), 2.15 (s, 3H).  $^{13}\text{C}$  NMR (101 MHz,  $\text{CDCl}_3$ )  $\delta$  170.6, 161.5, 151.6 (q,  $J = 6.0$  Hz), 130.4 (q,  $J = 2.2$  Hz), 126.7 (q,  $J = 270.8$  Hz), 125.2, 114.1, 113.9 (q,  $J = 35.2$  Hz), 55.4, 35.4, 22.4.  $^{19}\text{F}$  NMR (376 MHz,  $\text{CDCl}_3$ )  $\delta$  -55.8. HRMS (ESI)  $m/z$  Calcd for  $\text{C}_{13}\text{H}_{15}\text{F}_3\text{NO}_2^+$   $[\text{M}+\text{H}]^+$ : 274.1049, Found: 274.1059.

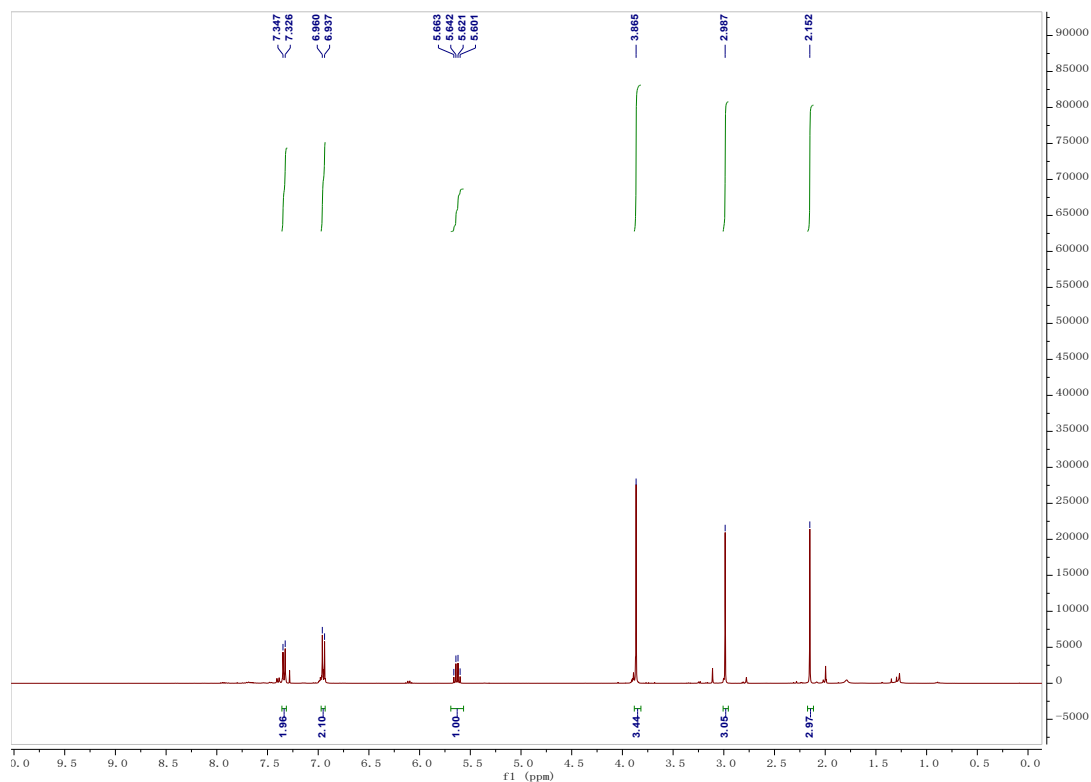



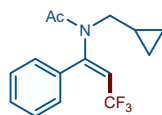

**(*E*)-*N*-(cyclopropylmethyl)-*N*-(3,3,3-trifluoro-1-phenylprop-1-en-1-yl) acetamide (40)**

Following the general procedure, the compound was obtained as a colorless oil in 77% yield (E:Z >20:1, 43.6 mg);  $R_f = 0.35$  (Petroleum ether/EtOAc = 5/1).  $^1\text{H}$  NMR (400 MHz, Chloroform- $d$ )  $\delta$  7.47 – 7.40 (m, 5H), 5.78 (q,  $J = 8.4$  Hz, 1H), 3.21 (d,  $J = 6.8$  Hz, 2H), 2.21 (s, 3H), 1.00 – 0.91 (m, 1H), 0.48 – 0.43 (m, 2H), 0.13 – 0.10 (m, 2H).  $^{13}\text{C}$  NMR (101 MHz,  $\text{CDCl}_3$ )  $\delta$  170.0, 150.6 (q,  $J = 5.1$  Hz), 133.0, 130.7, 128.91, 128.9, 128.6, 126.4 (d,  $J = 271.7$  Hz), 116.7 (d,  $J = 35.4$  Hz), 50.5, 22.6, 9.8, 3.6.  $^{19}\text{F}$  NMR (376 MHz,  $\text{CDCl}_3$ )  $\delta$  -55.9. HRMS (ESI)  $m/z$  Calcd for  $\text{C}_{15}\text{H}_{17}\text{F}_3\text{NO}^+$   $[\text{M}+\text{H}]^+$ : 284.1257, Found: 284.1265.

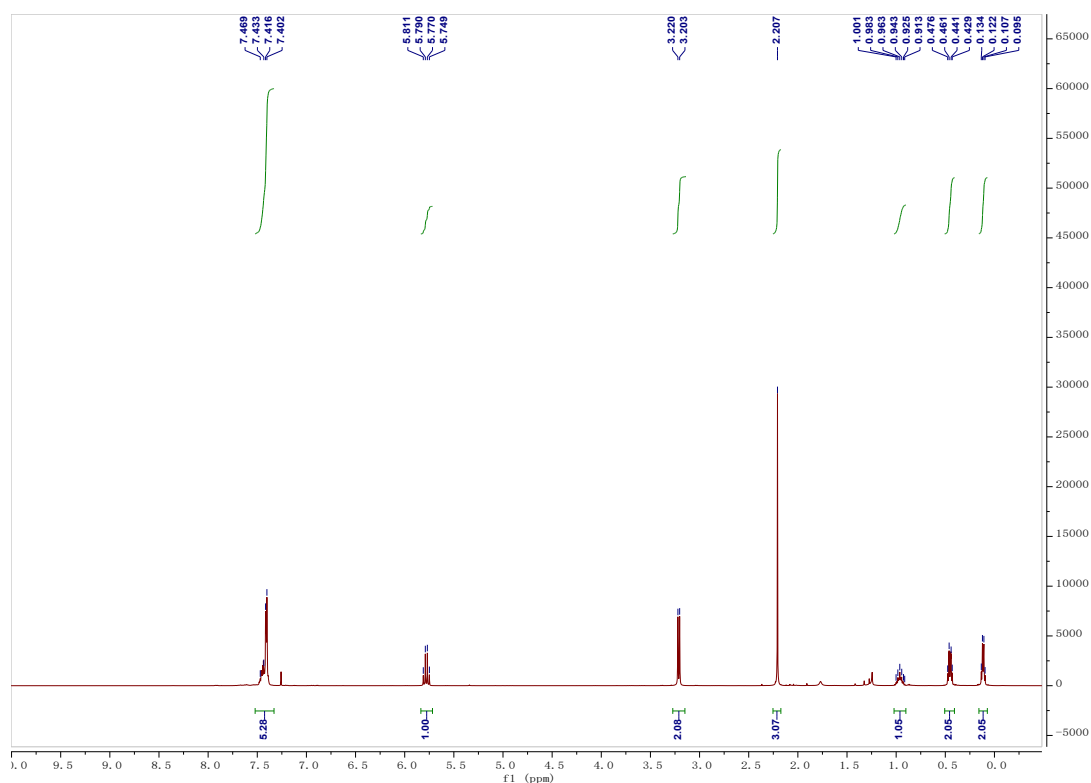

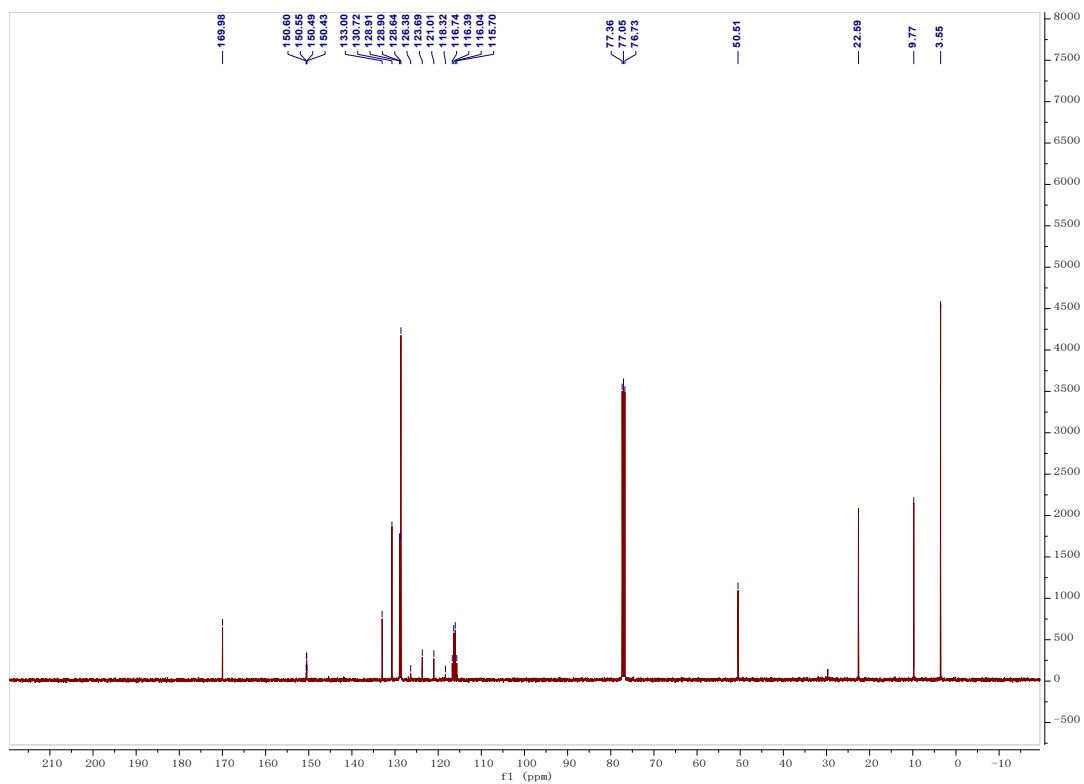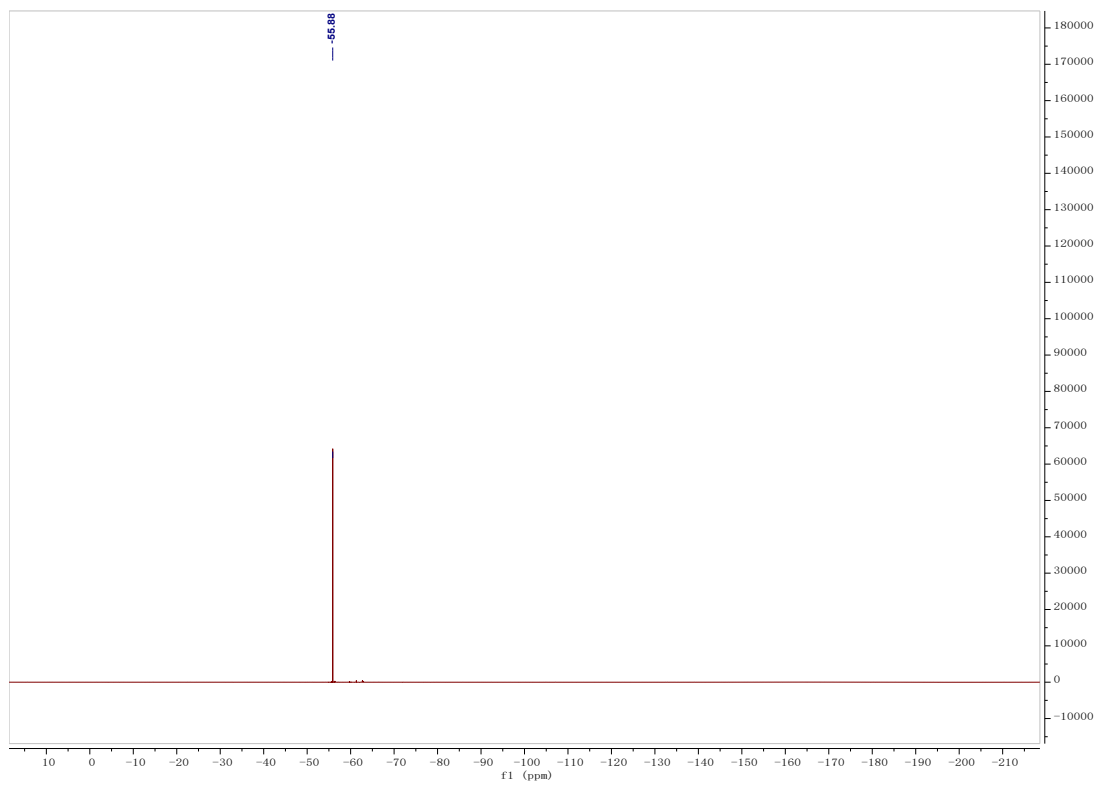

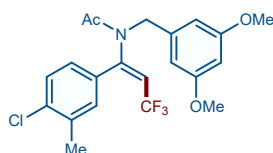

**(*E*)-*N*-(1-(4-chloro-3-methylphenyl)-3,3,3-trifluoroprop-1-en-1-yl)-*N*-(3,5-dimethoxybenzyl) acetamide (**4p**)**

Following the general procedure, the compound was obtained as a colorless oil in 30% yield (E:Z >20:1, 26.0 mg);  $R_f = 0.20$  (Petroleum ether/EtOAc = 3/1).  $^1\text{H}$  NMR (400 MHz, Chloroform- $d$ )  $\delta$  7.41 (d,  $J = 8.0$  Hz, 1H), 7.16 – 7.12 (m, 2H), 6.39 (t,  $J = 2.4$  Hz, 1H), 6.31 (d,  $J = 2.4$  Hz, 2H), 5.55 (q,  $J = 8.0$  Hz, 1H), 4.48 (s, 2H), 3.78 (s, 6H), 2.40 (s, 3H), 2.25 (s, 3H).  $^{13}\text{C}$  NMR (101 MHz,  $\text{CDCl}_3$ )  $\delta$  170.0, 160.9, 149.1 (q,  $J = 5.9$  Hz), 138.7, 137.2, 136.8, 131.4, 131.0, 129.4, 127.8, 126.1 (q,  $J = 268.3$  Hz), 117.4 (q,  $J = 35.1$  Hz), 106.5, 99.7, 55.3, 49.9, 22.7, 20.1.  $^{19}\text{F}$  NMR (376 MHz,  $\text{CDCl}_3$ )  $\delta$  -55.8. HRMS (ESI)  $m/z$  Calcd for  $\text{C}_{21}\text{H}_{22}\text{ClF}_3\text{NO}_3^+ [\text{M}+\text{H}]^+$ : 428.1235, Found: 428.1244.

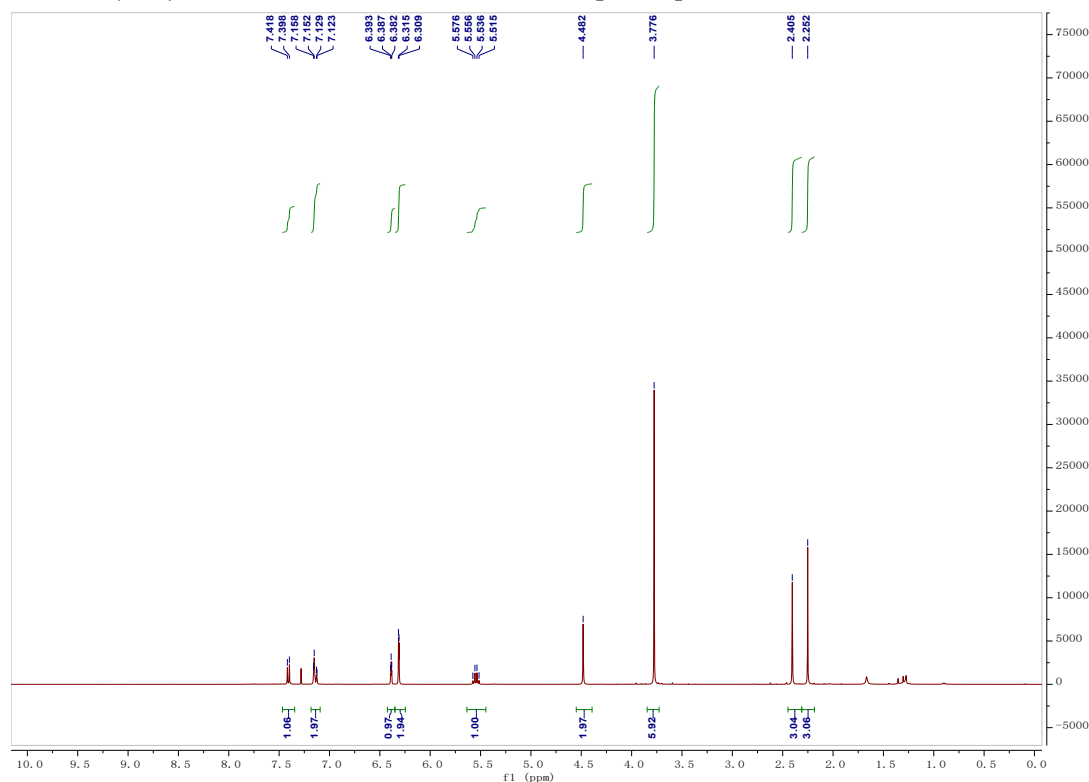

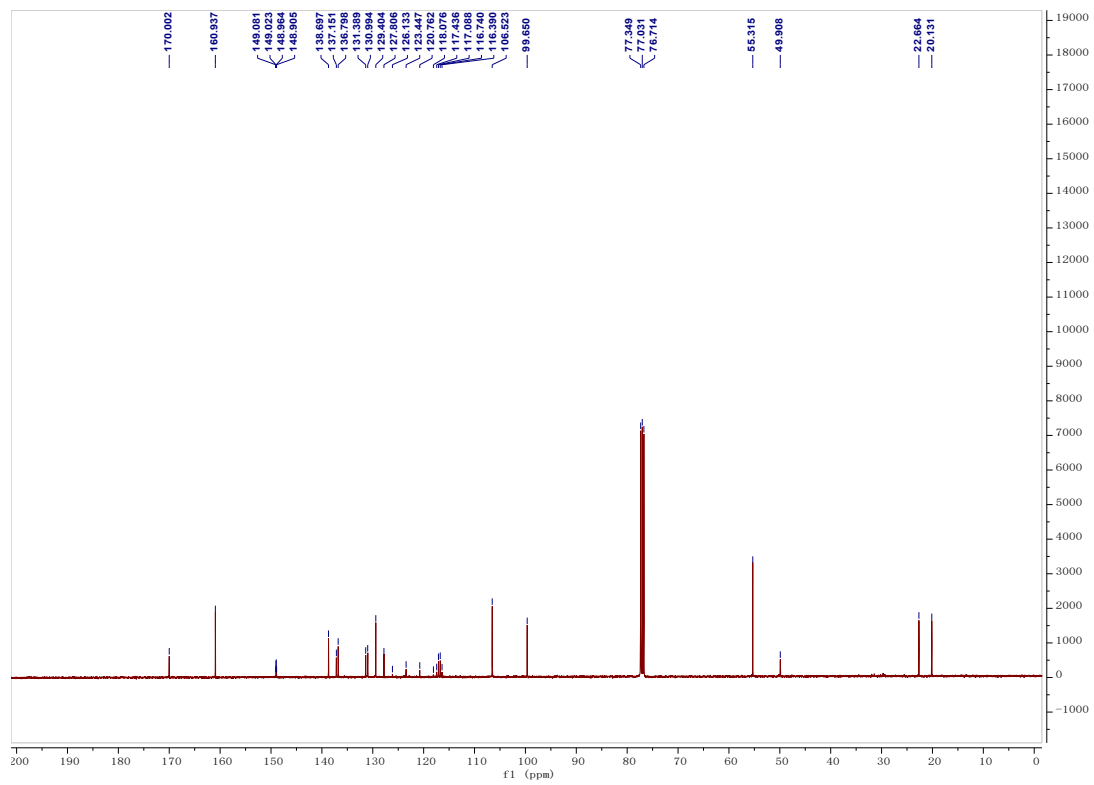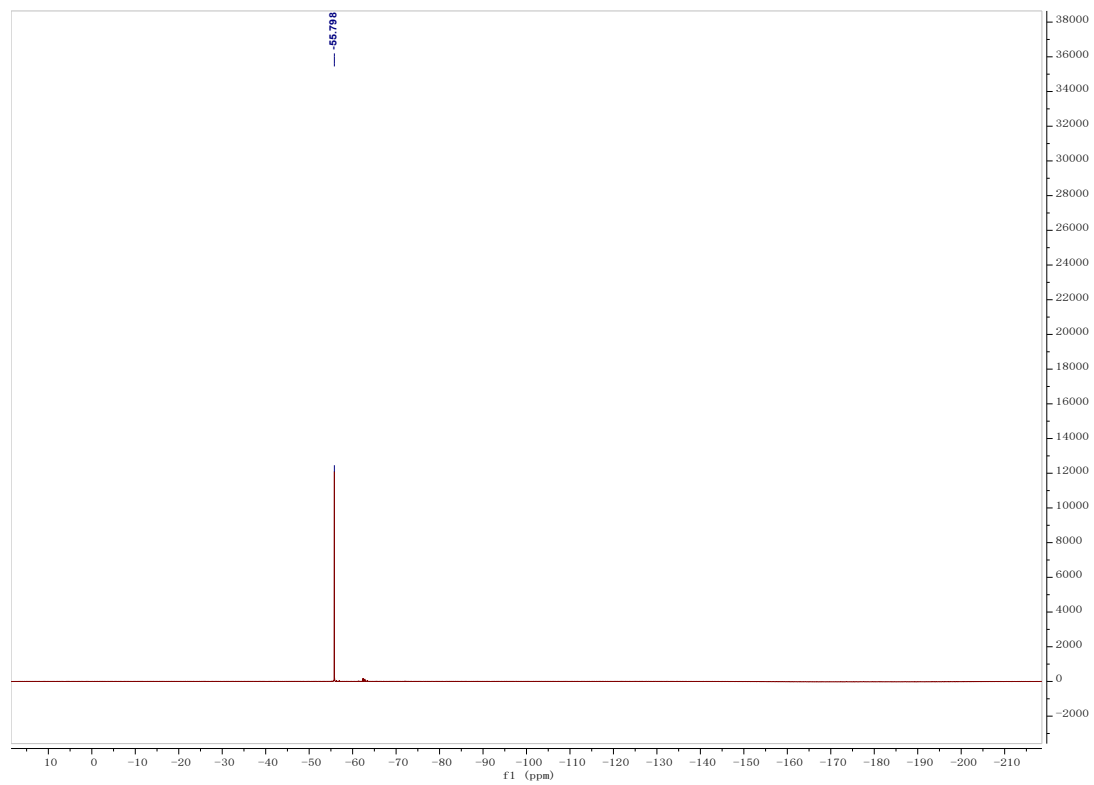

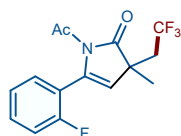

### 1-acetyl-5-(2-fluorophenyl)-3-methyl-3-(2,2,2-trifluoroethyl)-1,3-dihydro-2H-pyrrol-2-one (4q)

Following the general procedure, the compound was obtained as a colorless oil in 66% yield (42.0 mg);  $R_f = 0.65$  (Petroleum ether/EtOAc = 3/1).  $^1\text{H}$  NMR (400 MHz, Chloroform- $d$ )  $\delta$  7.83 (d,  $J = 8.0$  Hz, 1H), 7.40 (td,  $J = 7.6, 1.2$  Hz, 1H), 7.30 – 7.28 (m, 1H), 7.09 (td,  $J = 7.6, 1.6$  Hz, 1H), 5.57 – 5.48 (m, 1H), 2.80 – 2.67 (m, 1H), 2.57 – 2.49 (m, 4H), 1.46 (s, 3H).  $^{13}\text{C}$  NMR (101 MHz,  $\text{CDCl}_3$ )  $\delta$  179.5, 168.7, 143.7, 138.8, 138.3, 129.9, 129.7, 128.0, 125.5 (q,  $J = 279.4$  Hz), 116.5, 98.0, 46.5, 41.1 (q,  $J = 27.8$  Hz), 25.6, 23.2.  $^{19}\text{F}$  NMR (376 MHz,  $\text{CDCl}_3$ )  $\delta$  -61.4, -62.5. HRMS (ESI)  $m/z$  Calcd for  $\text{C}_{15}\text{H}_{13}\text{F}_4\text{NNaO}_2^+ [\text{M}+\text{H}]^+$ : 338.0775, Found: 338.0788.

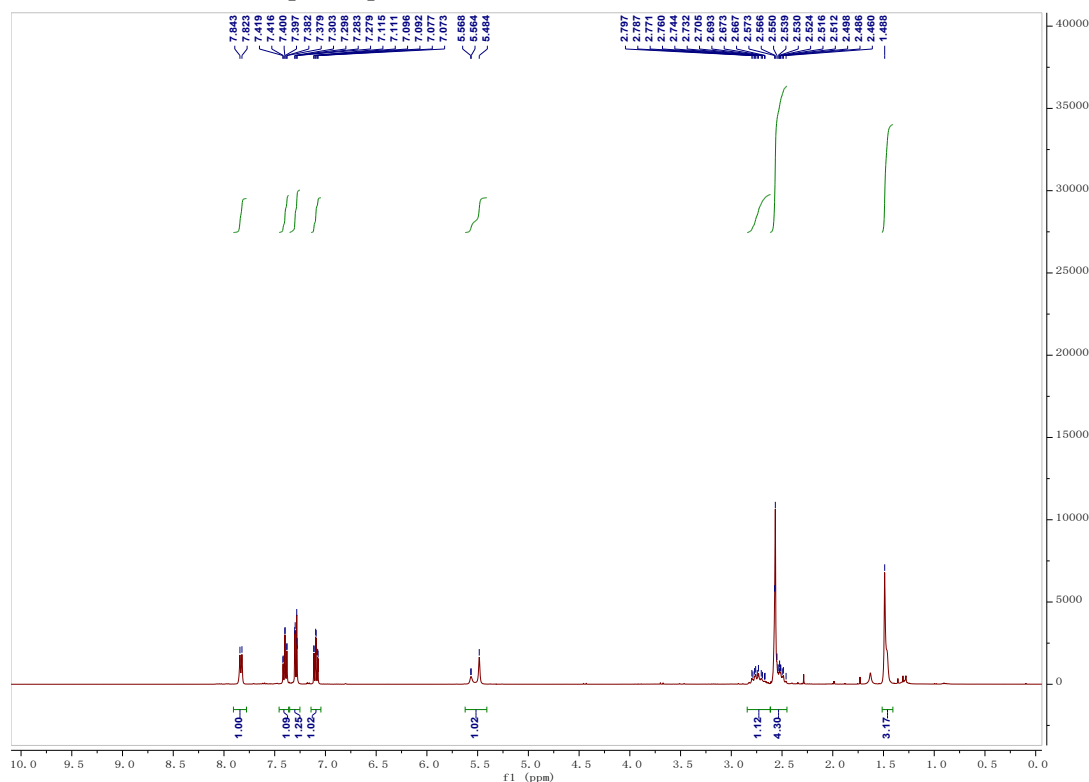

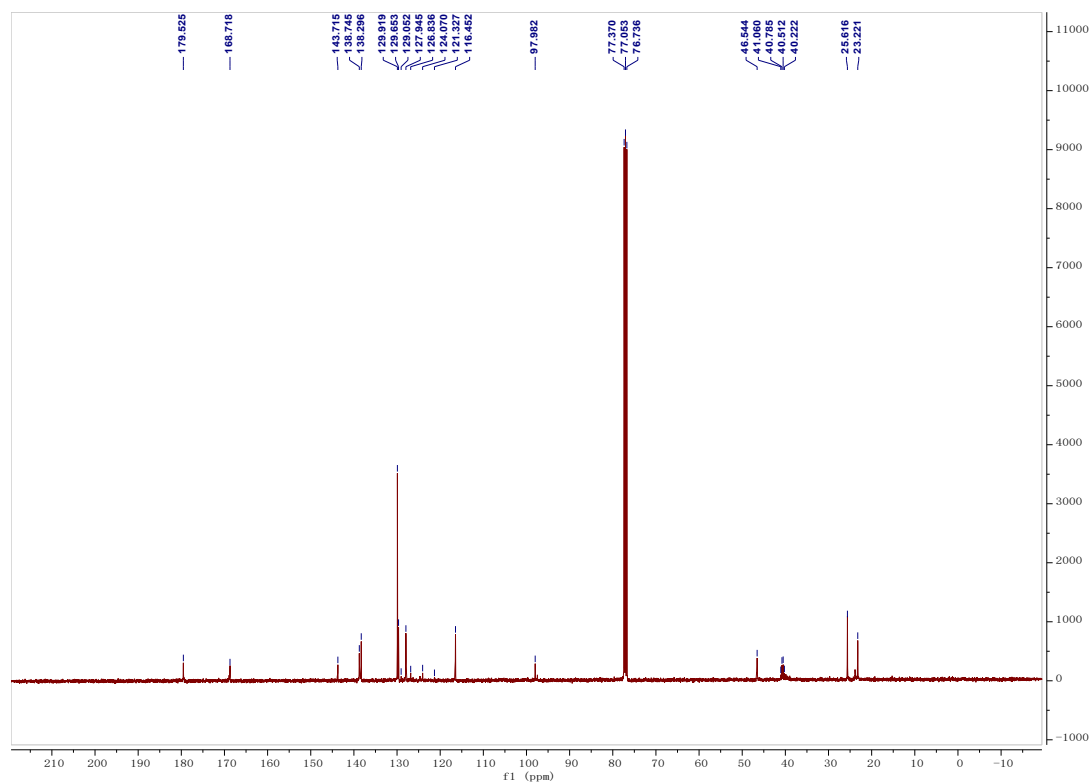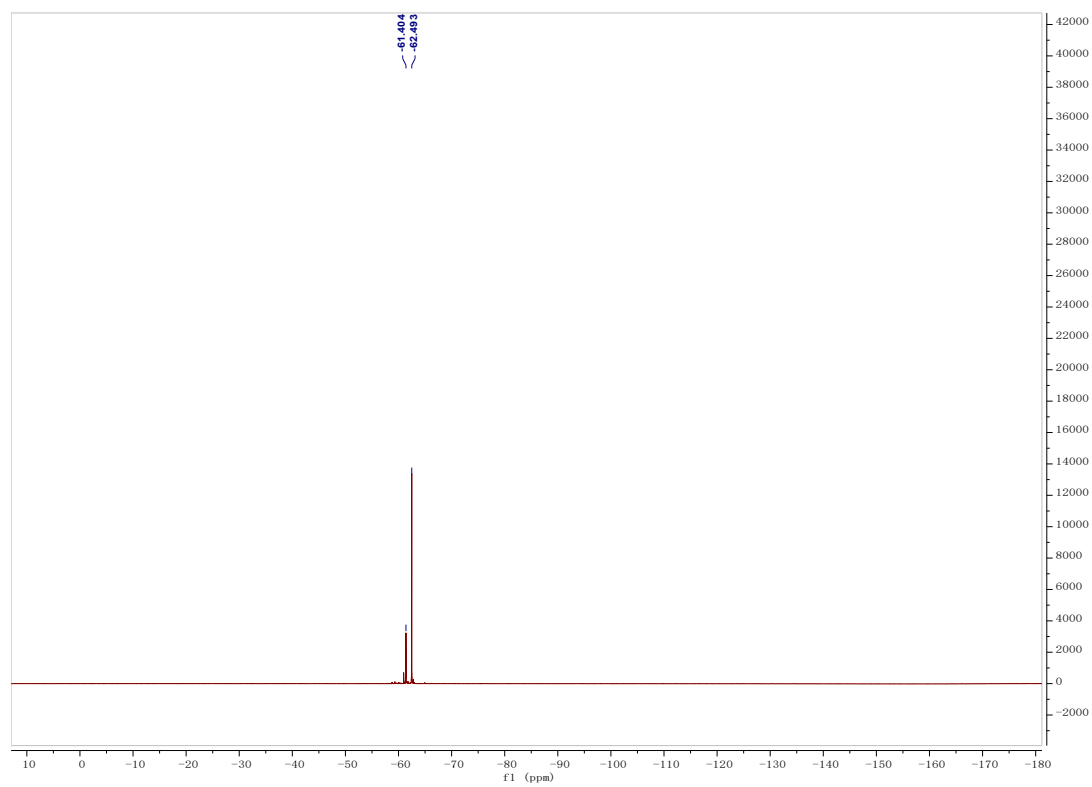

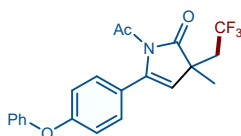

### 1-acetyl-3-methyl-5-(4-phenoxyphenyl)-3-(2,2,2-trifluoroethyl)-1,3-dihydro-2H-pyrrol-2-one (4r)

Following the general procedure, the compound was obtained as a colorless oil in 37% yield (28.8 mg);  $R_f = 0.35$  (Petroleum ether/EtOAc = 5/1).  $^1\text{H}$  NMR (400 MHz, Chloroform- $d$ )  $\delta$  7.40 – 7.36 (m, 2H), 7.24 – 7.22 (m, 2H), 7.18 – 7.13 (m, 1H), 7.10 – 7.07 (m, 2H), 7.00 – 6.98 (m, 2H), 5.55 (q,  $J = 1.6$  Hz, 1H), 2.77 – 2.65 (m, 1H), 2.60 (s, 3H), 2.57 – 2.49 (m, 1H), 1.43 (s, 3H).  $^{13}\text{C}$  NMR (101 MHz,  $\text{CDCl}_3$ )  $\delta$  180.4, 169.5, 157.8, 156.5, 142.4, 129.9, 128.5, 127.4, 124.4 (q,  $J = 278.7$  Hz), 123.8, 119.5, 117.7, 115.6, 46.6 (q,  $J = 1.8$  Hz), 41.2 (q,  $J = 28.1$  Hz), 26.2, 23.9.  $^{19}\text{F}$  NMR (376 MHz,  $\text{CDCl}_3$ )  $\delta$  -62.4. HRMS (ESI)  $m/z$  Calcd for  $\text{C}_{21}\text{H}_{19}\text{F}_3\text{NO}_3$   $[\text{M}+\text{H}]^+$ : 390.1312, Found: 390.1321.

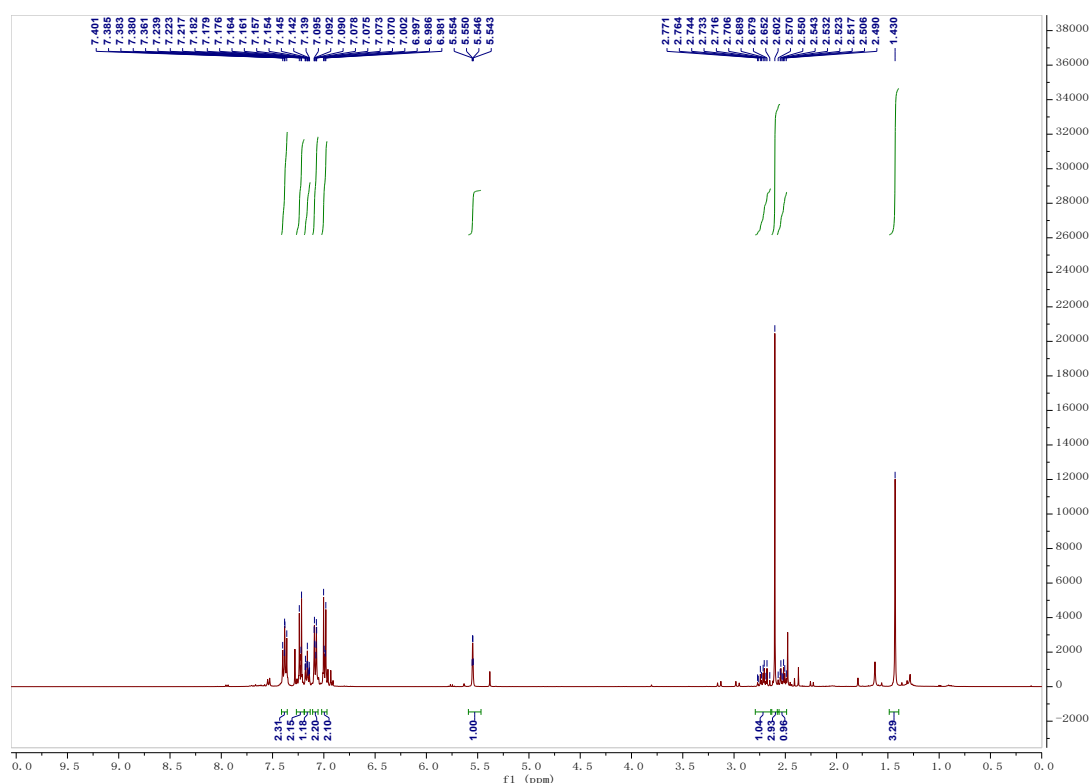

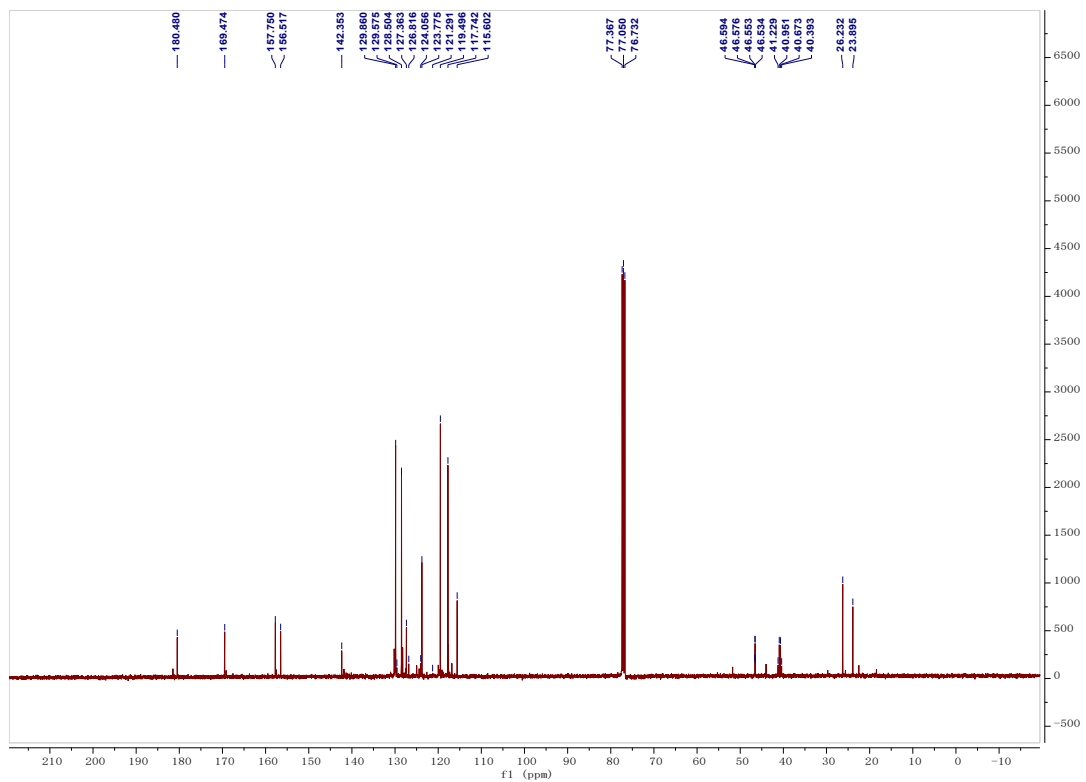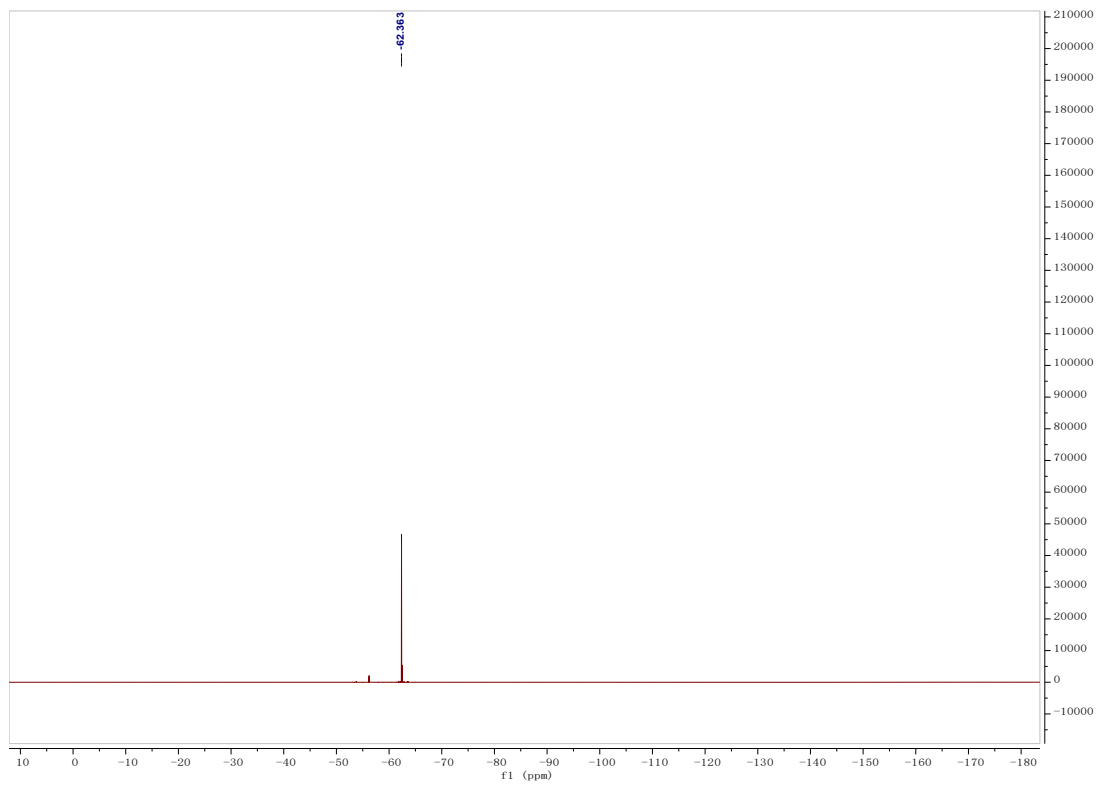

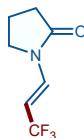

**(E)-1-(3,3,3-trifluoroprop-1-en-1-yl) pyrrolidin-2-one (4s)**

Following the general procedure, the compound was obtained as a yellow oil in 47% yield (125.2 mg);  $R_f = 0.35$  (Petroleum ether/EtOAc = 1/1).  $^1\text{H}$  NMR (400 MHz, Chloroform- $d$ )  $\delta$  7.61 (dd,  $J = 14.4, 2.0$  Hz, 1H), 5.04 – 4.96 (m, 1H), 3.53 (t,  $J = 7.2$  Hz, 2H), 2.53 (t,  $J = 8.0$  Hz, 2H), 2.21 – 2.14 (m, 2H).  $^{13}\text{C}$  NMR (101 MHz,  $\text{CDCl}_3$ )  $\delta$  174.2, 131.1 (q,  $J = 7.4$  Hz), 128.3 (q,  $J = 268.4$  Hz), 98.8 (q,  $J = 34.9$  Hz), 44.7, 30.8, 17.3.  $^{19}\text{F}$  NMR (376 MHz,  $\text{CDCl}_3$ )  $\delta$  -60.4. HRMS (ESI)  $m/z$  Calcd for  $\text{C}_7\text{H}_9\text{F}_3\text{NO}^+$   $[\text{M}+\text{H}]^+$ : 180.0631, Found: 180.0637.

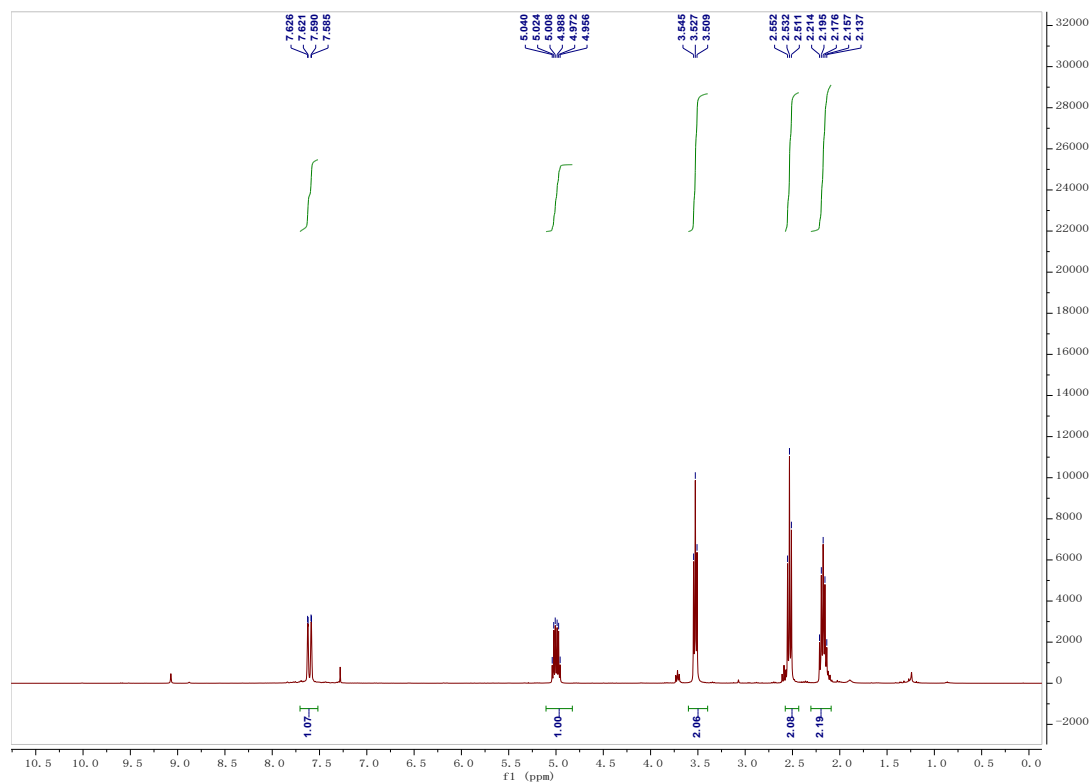

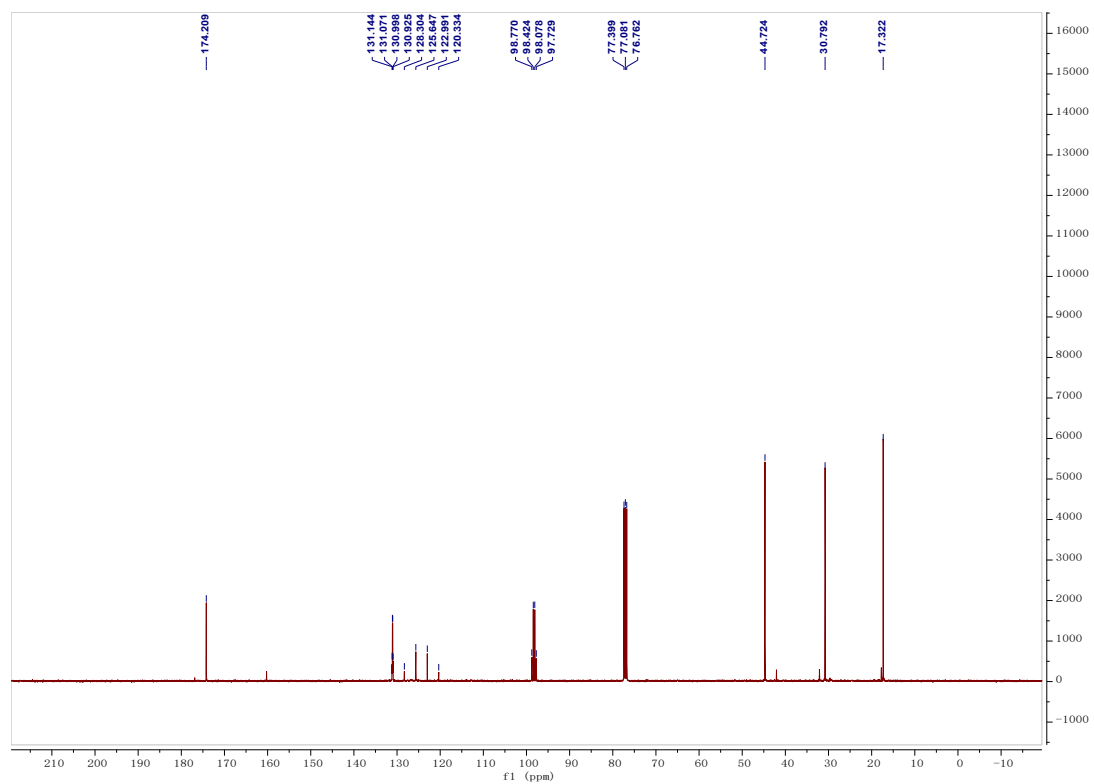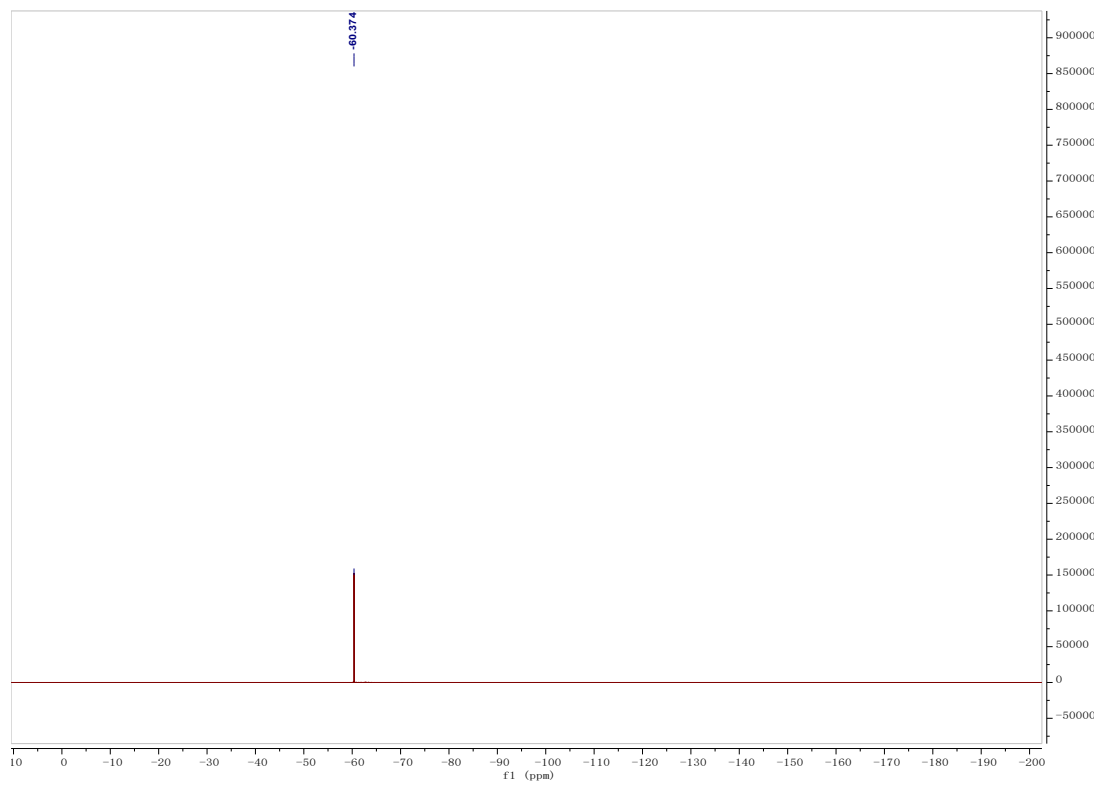

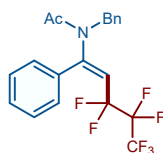

**(*E*)-*N*-benzyl-*N*-(3,3,4,4,5,5,5-heptafluoro-1-phenylpent-1-en-1-yl) acetamide (**4t**)**

Following the general procedure, the compound was obtained as a colorless oil in 60% yield (E:Z >10:1, 50.4 mg);  $R_f = 0.55$  (Petroleum ether/EtOAc = 5/1).  $^1\text{H}$  NMR (400 MHz, Chloroform- $d$ )  $\delta$  7.53 – 7.43 (m, 3H), 7.36 – 7.28 (m, 5H), 7.19 – 7.16 (m, 2H), 5.45 (t,  $J = 14.4$  Hz, 1H), 4.52 (s, 2H), 2.31 (s, 3H).  $^{13}\text{C}$  NMR (101 MHz,  $\text{CDCl}_3$ )  $\delta$  169.9, 151.6 (t,  $J = 4.0$  Hz), 136.4, 133.1, 130.7, 129.1 (t,  $J = 3.0$  Hz), 128.6, 128.56, 128.5, 127.7, 114.2 (t,  $J = 22.2$  Hz), 49.4, 22.6.  $^{19}\text{F}$  NMR (376 MHz,  $\text{CDCl}_3$ )  $\delta$  -80.2 (t,  $J = 11.3$  Hz), -104.7 (q,  $J = 7.5$  Hz), -126.8. HRMS (ESI)  $m/z$  Calcd for  $\text{C}_{20}\text{H}_{17}\text{F}_7\text{NO}^+$   $[\text{M}+\text{H}]^+$ : 420.1193, Found: 420.1201.

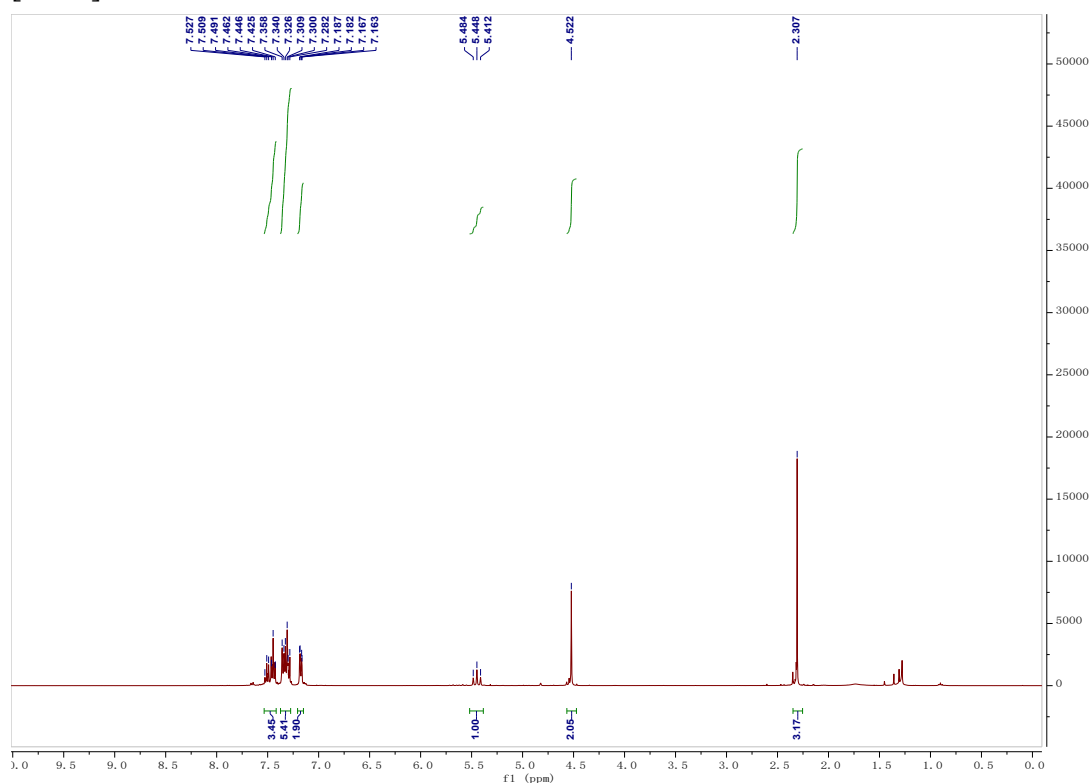

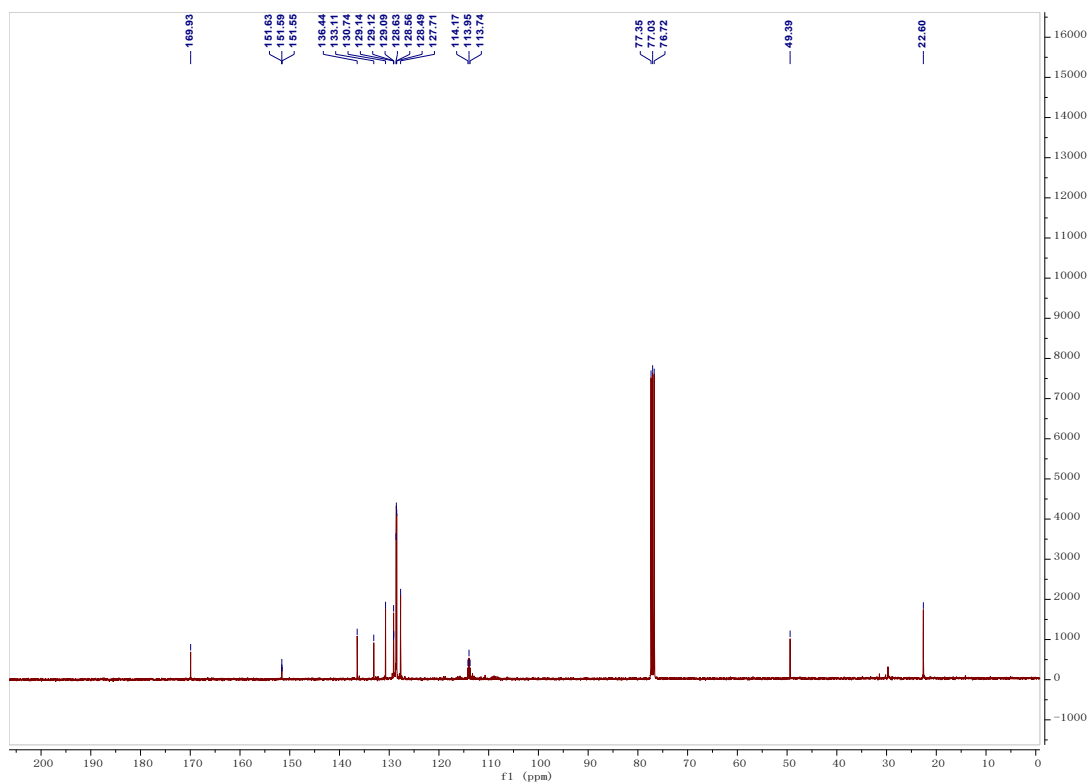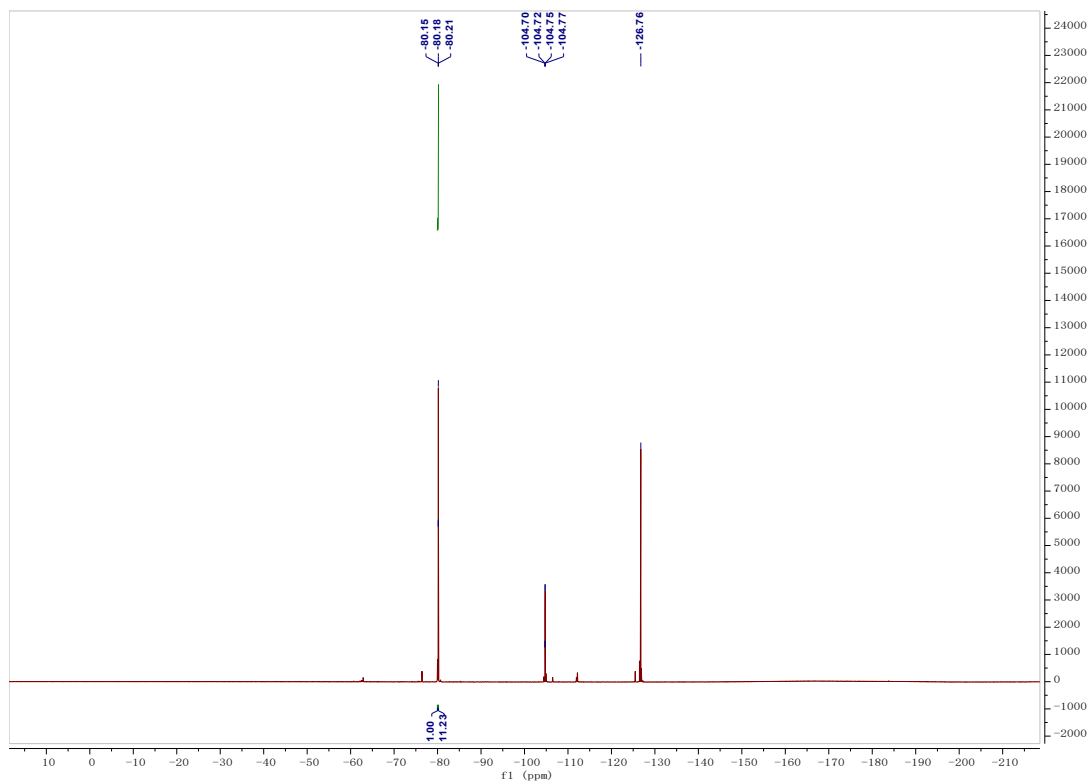

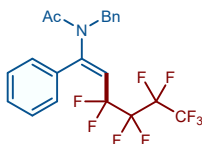

**(E)-N-benzyl-N-(3,3,4,4,5,5,6,6,6-nonafluoro-1-phenylhex-1-en-1-yl) acetamide (4u)**

Following the general procedure, the compound was obtained as a colorless oil in 49% yield (E:Z >20:1, 45.8 mg);  $R_f = 0.50$  (Petroleum ether/EtOAc = 5/1).  $^1\text{H}$  NMR (400 MHz, Chloroform- $d$ )  $\delta$  7.53 – 7.43 (m, 3H), 7.36 – 7.28 (m, 5H), 7.19 – 7.16 (m, 2H), 5.45 (t,  $J = 14.4$  Hz, 1H), 4.52 (s, 2H), 2.31 (s, 3H).  $^{13}\text{C}$  NMR (101 MHz,  $\text{CDCl}_3$ )  $\delta$  169.9, 151.6, 136.4, 133.1, 130.7, 129.1 (t,  $J = 2.8$  Hz), 128.6, 128.55, 128.5, 127.7, 114.3 (t,  $J = 22.1$  Hz), 49.4, 22.6.  $^{19}\text{F}$  NMR (376 MHz,  $\text{CDCl}_3$ )  $\delta$  -81.06 – -81.12 (m), -104.00 – -104.08 (m), -123.26 – -123.33 (m), -125.8 – -125.9 (m). HRMS (ESI)  $m/z$  Calcd for  $\text{C}_{21}\text{H}_{17}\text{F}_9\text{NO}^+$   $[\text{M}+\text{H}]^+$ : 470.1161, Found: 470.1171.

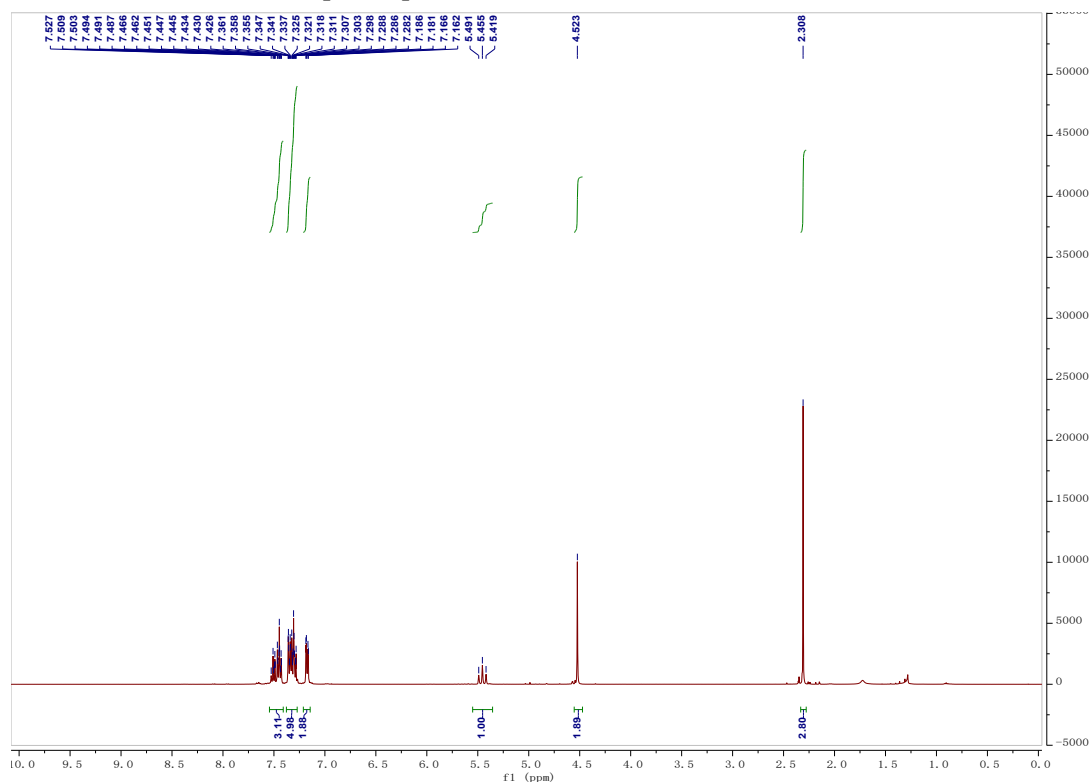

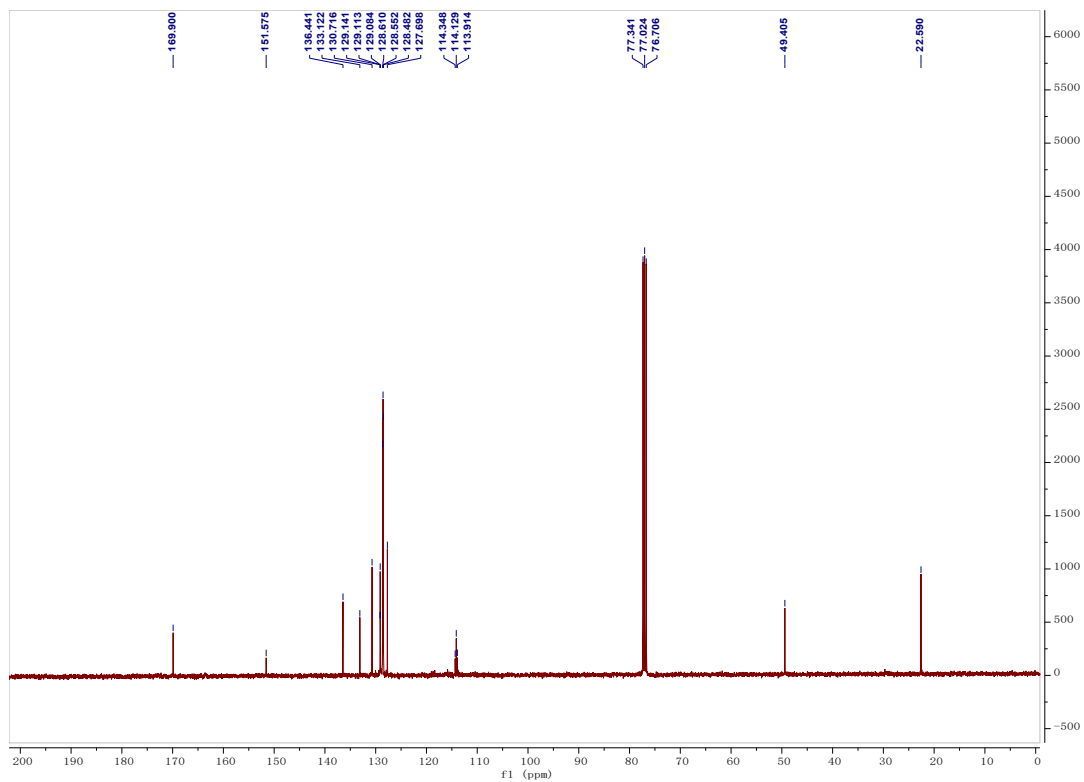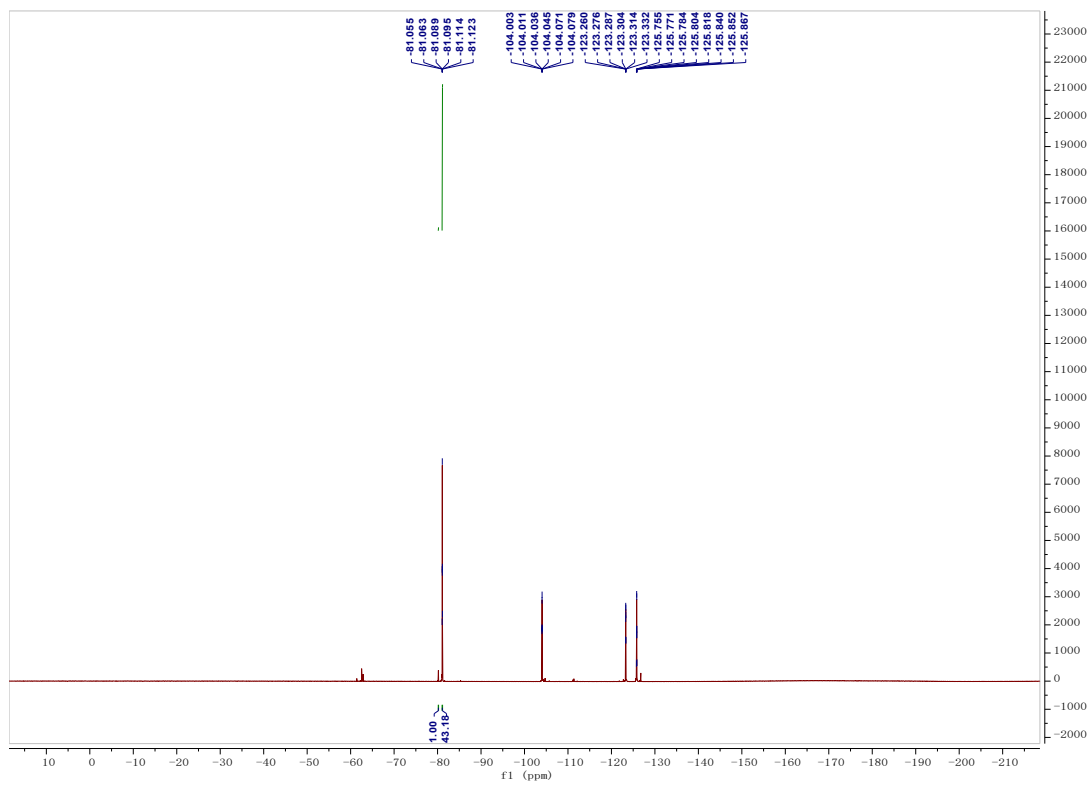

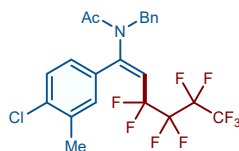

**(*E*)-*N*-benzyl-*N*-(1-(4-chloro-3-methylphenyl)-3,3,4,4,5,5,6,6,6-nonafluorohex-1-en-1-yl) acetamide (4v)**

Following the general procedure, the compound was obtained as a colorless oil in 59% yield (E:Z >20:1, 60.6 mg);  $R_f = 0.50$  (Petroleum ether/EtOAc = 5/1).  $^1\text{H}$  NMR (400 MHz, Chloroform- $d$ )  $\delta$  7.41 (d,  $J = 8.0$  Hz, 1H), 7.35 – 7.29 (m, 3H), 7.17 – 7.10 (m, 4H), 5.45 (t,  $J = 14.0$  Hz, 1H), 4.52 (s, 2H), 2.41 (s, 3H), 2.29 (s, 3H).  $^{13}\text{C}$  NMR (101 MHz,  $\text{CDCl}_3$ )  $\delta$  169.9, 150.7 (t,  $J = 4.0$  Hz), 137.2, 136.6, 136.3, 131.6, 131.1 (t,  $J = 2.5$  Hz), 129.2, 128.6, 128.58, 128.1 (t,  $J = 3.0$  Hz), 127.8, 114.2 (t,  $J = 22.1$  Hz), 49.6, 22.7, 20.2.  $^{19}\text{F}$  NMR (376 MHz,  $\text{CDCl}_3$ )  $\delta$  -81.0 – -81.1 (m), -104.1 (t,  $J = 13.5$  Hz), -123.27 – -123.35 (m), -125.8 – -125.9.0 (m). HRMS (ESI)  $m/z$  Calcd for  $\text{C}_{22}\text{H}_{18}\text{ClF}_9\text{NO}^+$   $[\text{M}+\text{H}]^+$ : 518.0928, Found: 518.0934.

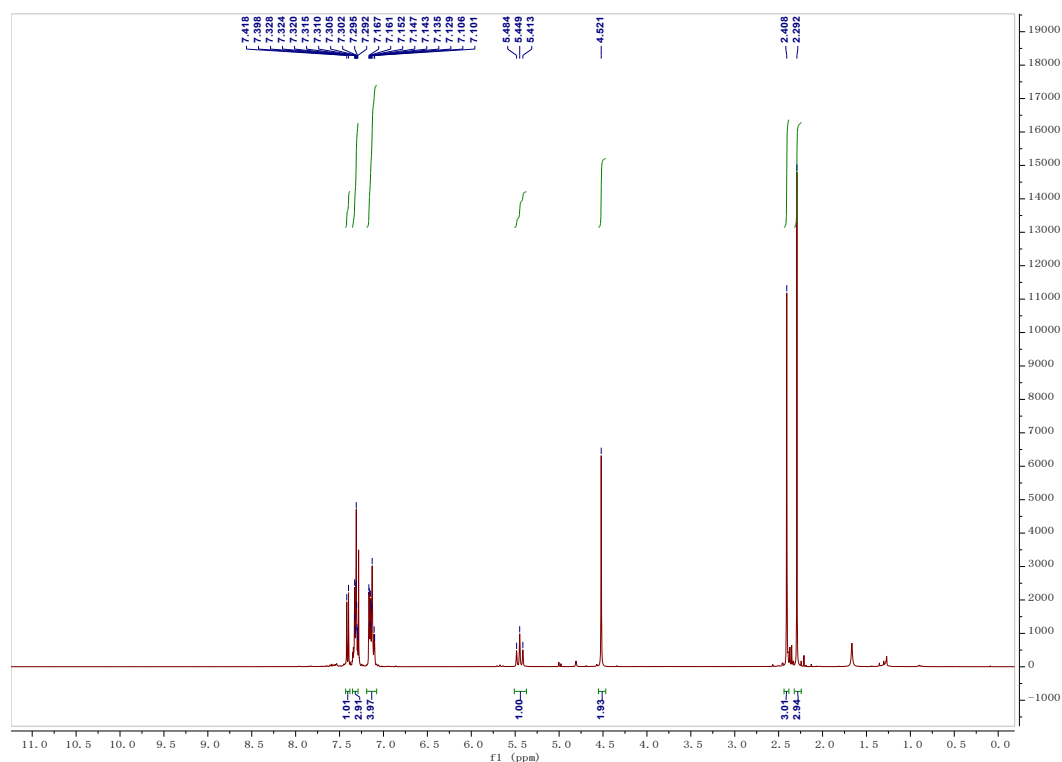

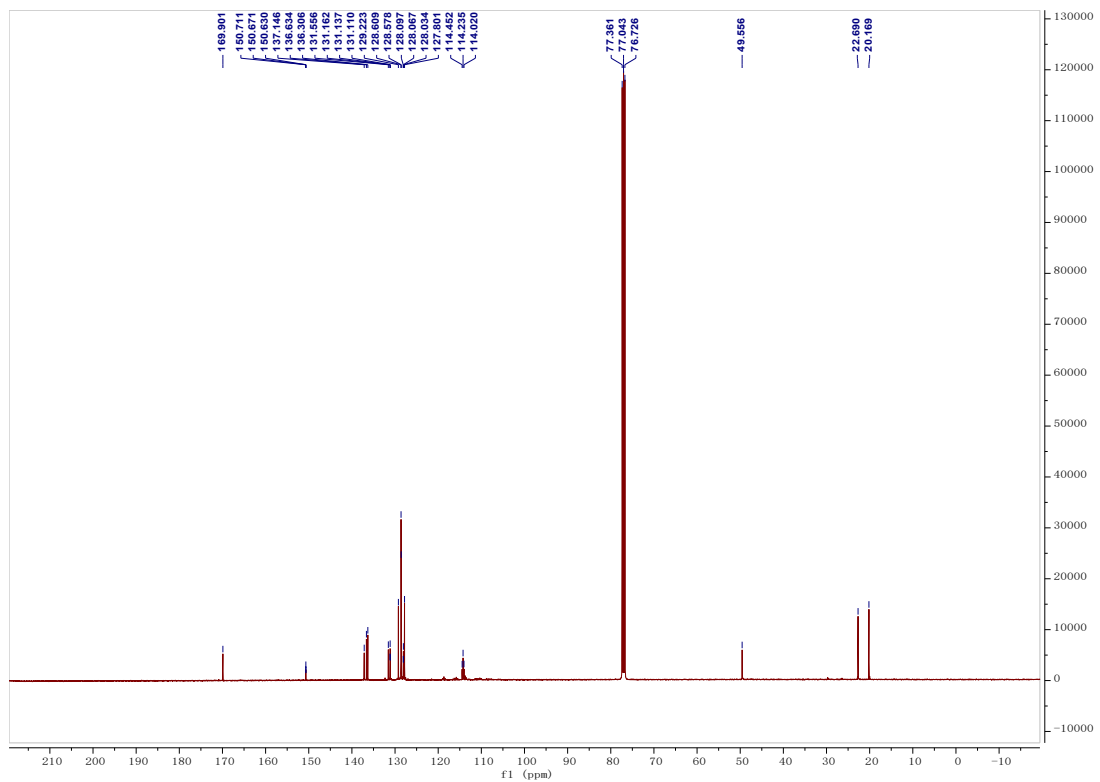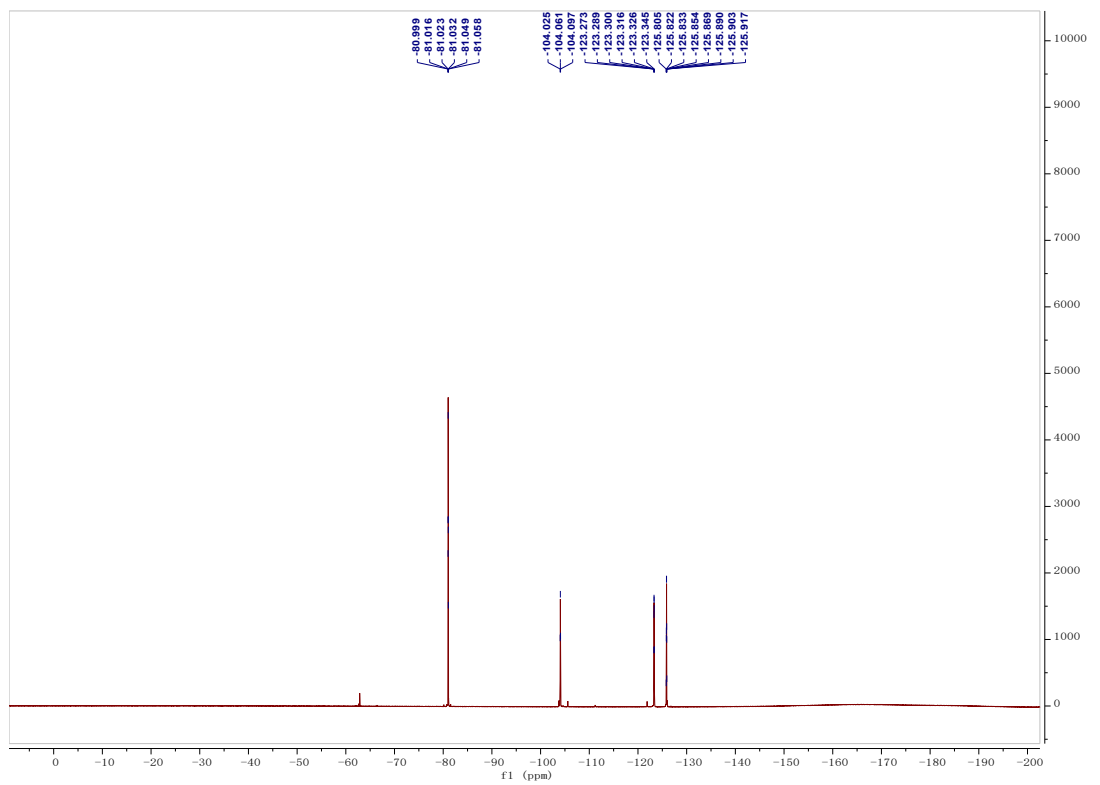

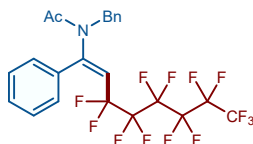

**(*E*)-*N*-benzyl-*N*-(3,3,4,4,5,5,6,6,7,7,8,8,8-tridecafluoro-1-phenyloct-1-en-1-yl)acetamide (4w)**

Following the general procedure, the compound was obtained as a colorless oil in 80% yield (E:Z >20:1, 90.9 mg);  $R_f = 0.35$  (Petroleum ether/EtOAc = 5/1).  $^1\text{H}$  NMR (400 MHz, Chloroform-*d*)  $\delta$  7.50 – 7.42 (m, 3H), 7.36 – 7.28 (m, 5H), 7.19 – 7.13 (m, 2H), 5.46 (t,  $J = 14.0$  Hz, 1H), 4.53 (s, 2H), 2.31 (s, 3H).  $^{13}\text{C}$  NMR (101 MHz,  $\text{CDCl}_3$ )  $\delta$  169.9, 151.5 (t,  $J = 3.4$  Hz), 136.5, 133.1, 130.7, 129.12, 129.1 (t,  $J = 2.8$  Hz), 128.6, 128.5, 128.45, 127.7, 114.5 (t,  $J = 22.0$  Hz), 49.4, 22.5.  $^{19}\text{F}$  NMR (376 MHz,  $\text{CDCl}_3$ )  $\delta$  -80.9 (t,  $J = 9.0$  Hz), -103.9 – -104.0 (m), -121.6 – -121.8 (m), -122.4 – -122.5 (m), -123.0, -126.2, – -126.3 (m). HRMS (ESI)  $m/z$  Calcd for  $\text{C}_{23}\text{H}_{17}\text{F}_{13}\text{NO}^+$   $[\text{M}+\text{H}]^+$ : 570.1097, Found: 570.1107.

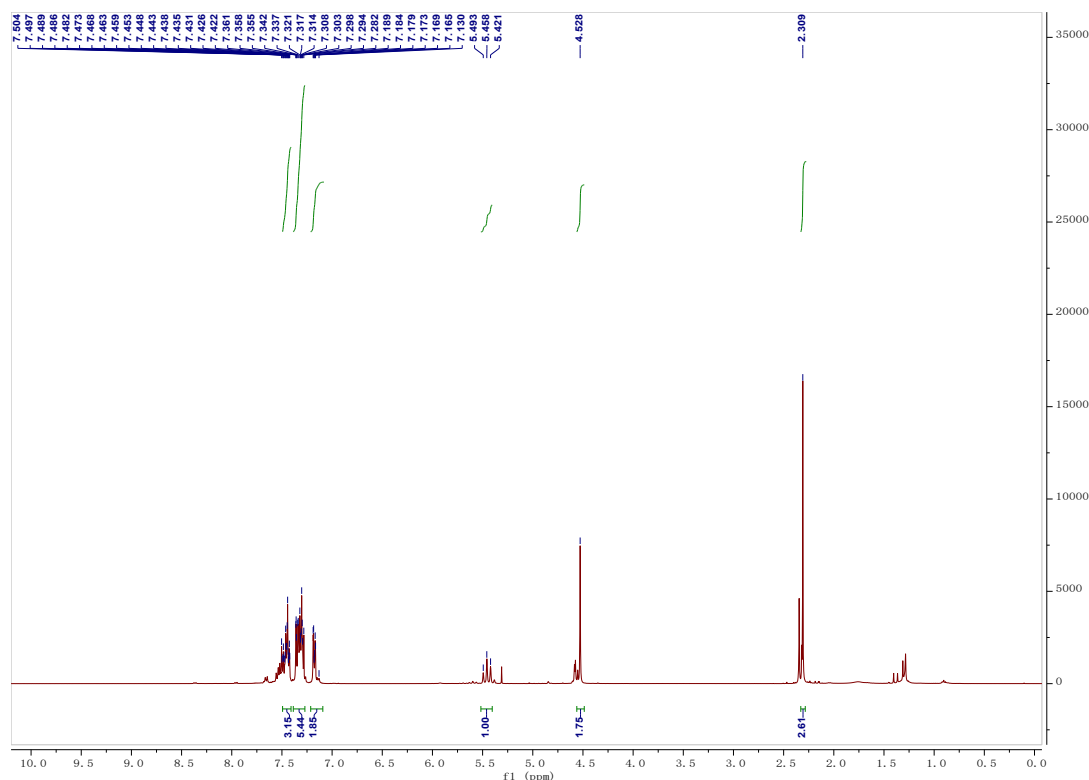

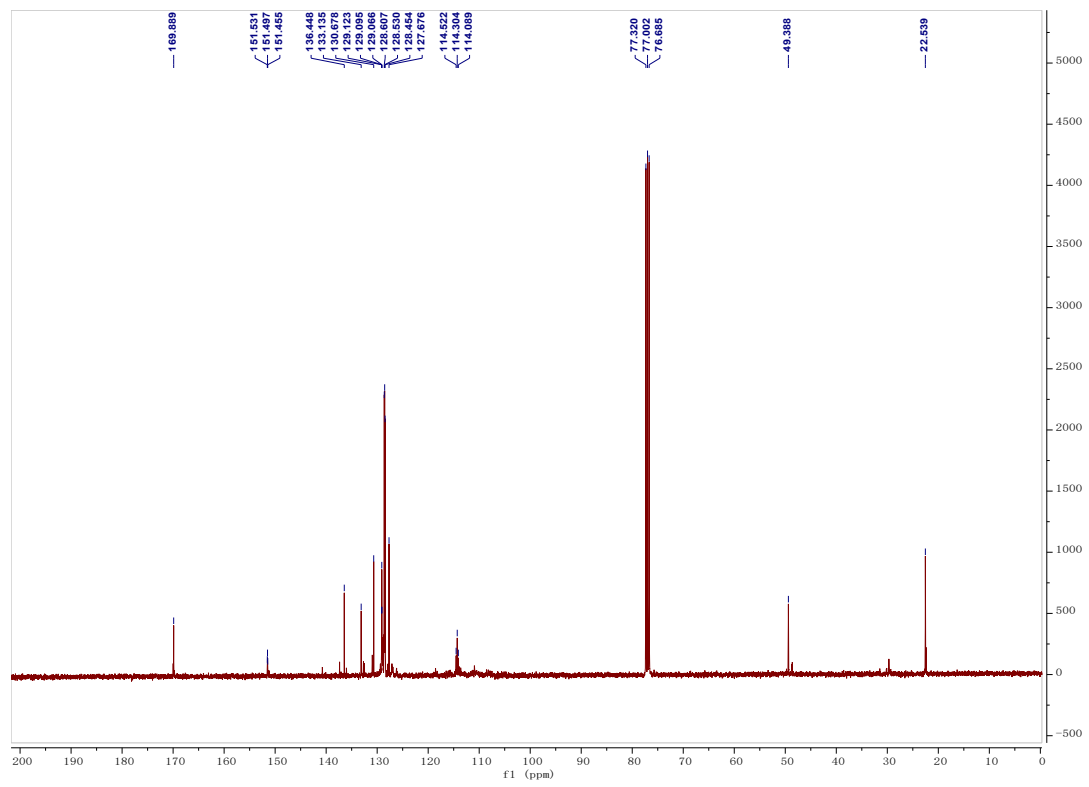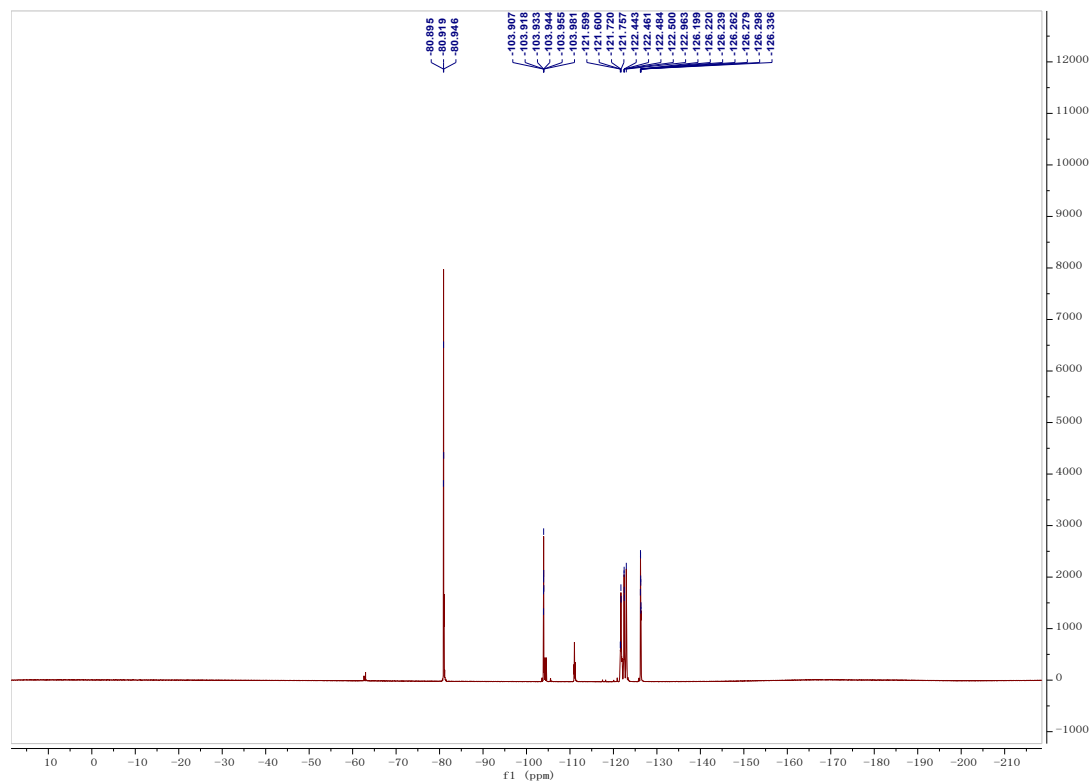

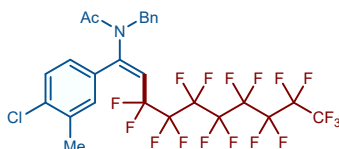

**(*E*)-*N*-benzyl-*N*-(1-(4-chloro-3-methylphenyl)-3,3,4,4,5,5,6,6,7,7,8,8,9,9,10,10,10-heptafluorodec-1-en-1-yl) acetamide (4x)**

Following the general procedure, the compound was obtained as a colorless oil in 65% yield (E:Z >20:1, 93.7 mg);  $R_f = 0.55$  (Petroleum ether/EtOAc = 5/1).  $^1\text{H}$  NMR (400 MHz, Chloroform- $d$ )  $\delta$  7.56 – 7.41 (m, 4H), 7.31 – 7.28 (m, 2H), 7.14 – 7.07 (m, 2H), 5.46 (t,  $J = 14.4$  Hz, 1H), 4.56 (s, 2H), 2.41 (s, 3H), 2.32 (s, 3H).  $^{13}\text{C}$  NMR (101 MHz,  $\text{CDCl}_3$ )  $\delta$  169.9, 150.1, 137.4, 137.3, 136.9, 132.5, 131.1, 129.4, 129.1, 128.9, 127.8, 127.1, 48.6, 22.4, 20.1.  $^{19}\text{F}$  NMR (376 MHz,  $\text{CDCl}_3$ )  $\delta$  -80.8 (t,  $J = 9.8$  Hz), -103.8 (t,  $J = 13.5$  Hz), -121.4 – -121.5 (m), -121.9 – -122.0 (m), -122.3 – -122.4 (m), -122.7 – -122.8 (m), -126.1 – -126.2 (m). HRMS (ESI)  $m/z$  Calcd for  $\text{C}_{26}\text{H}_{18}\text{ClF}_{17}\text{NO}^+$   $[\text{M}+\text{H}]^+$ : 718.0800, Found: 718.0804.

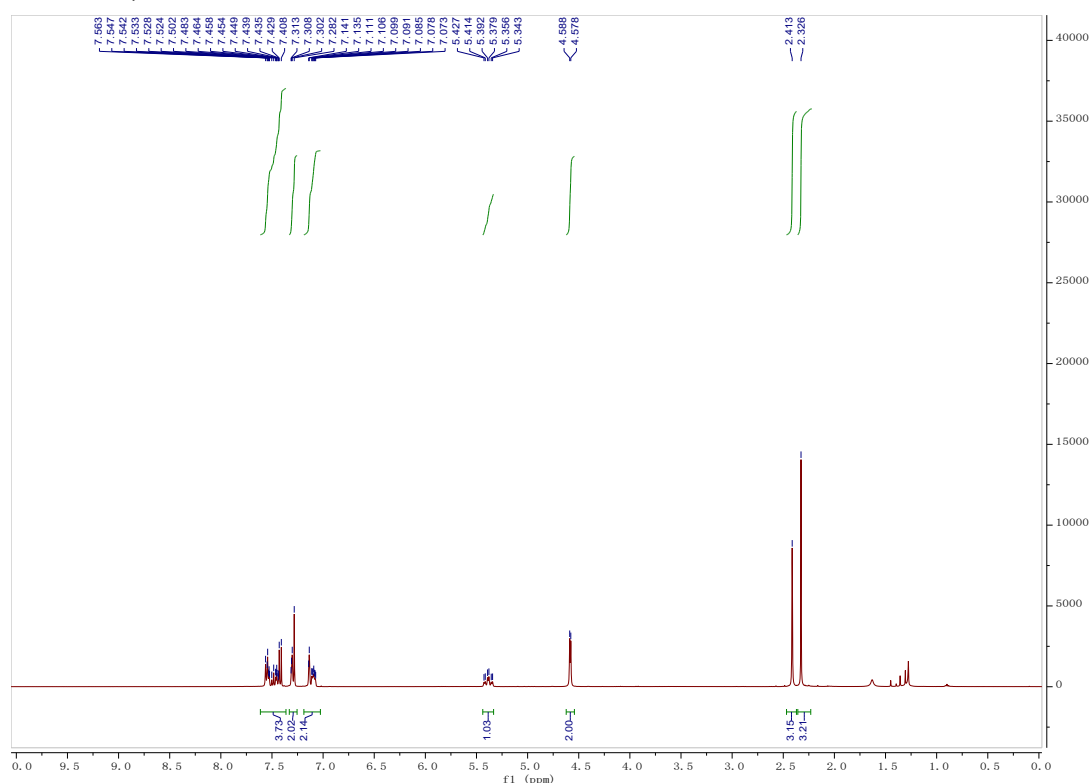

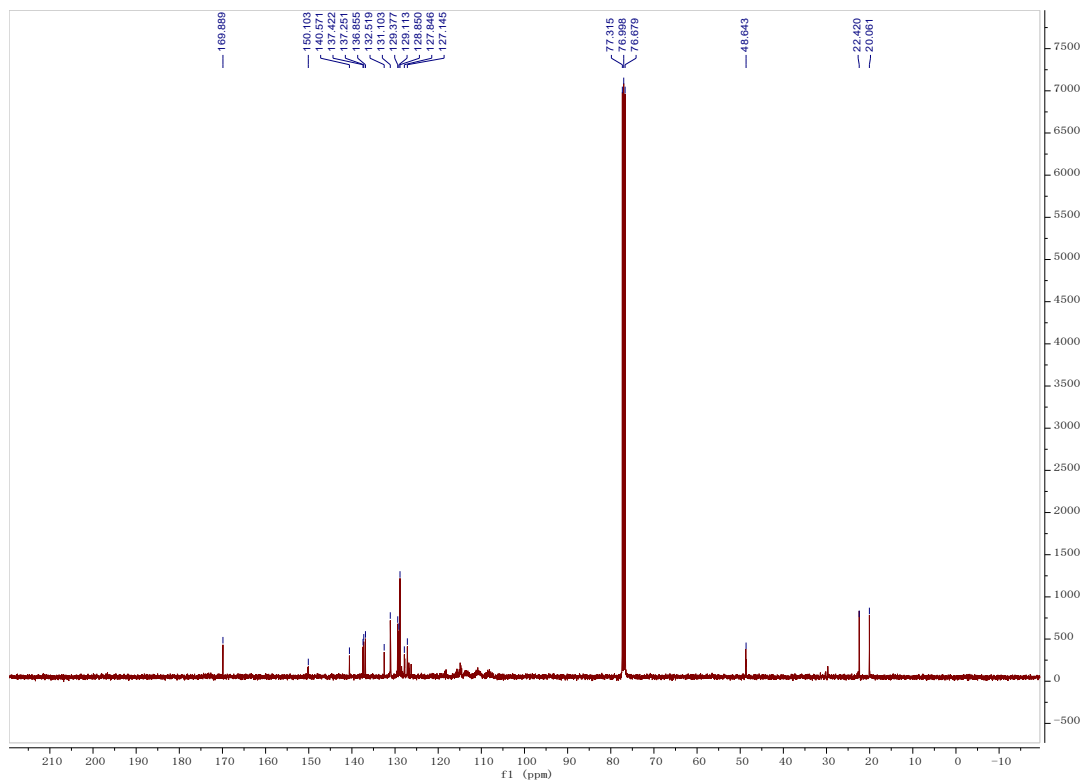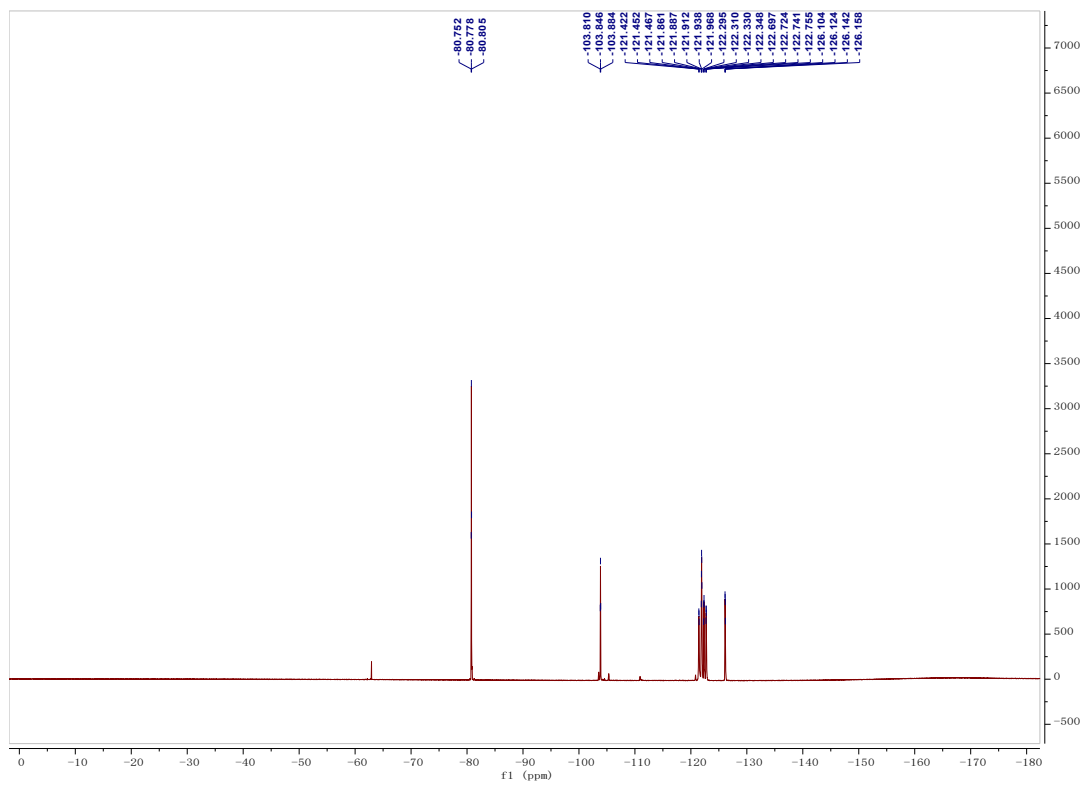

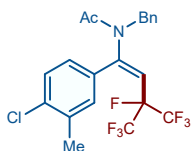

**(*E*)-*N*-benzyl-*N*-(1-(4-chloro-3-methylphenyl)-3,4,4,4-tetrafluoro-3-(trifluoromethyl)but-1-en-1-yl) acetamide (4y)**

Following the general procedure, the compound was obtained as a colorless oil in 53% yield (E:Z = 5:1, 49.5 mg);  $R_f = 0.45$  (Petroleum ether/EtOAc = 5/1).  $^1\text{H}$  NMR (400 MHz, Chloroform- $d$ )  $\delta$  7.59 – 7.05 (m, 8H), 5.27 – 5.16 (m, 1H), 4.53 – 4.48 (m, 2H), 2.41 (s, 3H), 2.34 – 2.30 (m, 2H).  $^{13}\text{C}$  NMR (101 MHz,  $\text{CDCl}_3$ )  $\delta$  169.5, 148.6, 136.6, 136.3, 136.2, 131.6 (d,  $J = 2.9$  Hz), 131.1 (d,  $J = 3.6$  Hz), 128.9, 128.7, 128.5, 128.1 (d,  $J = 5.1$  Hz), 127.8, 113.1 (d,  $J = 14.3$  Hz), 48.8, 22.5, 20.1.  $^{19}\text{F}$  NMR (376 MHz,  $\text{CDCl}_3$ )  $\delta$  -76.4 (d,  $J = 7.9$  Hz), -183.5 – -183.6 (m). HRMS (ESI)  $m/z$  Calcd for  $\text{C}_{21}\text{H}_{18}\text{ClF}_7\text{NO}^+$   $[\text{M}+\text{H}]^+$ : 468.0960, Found: 468.0969.

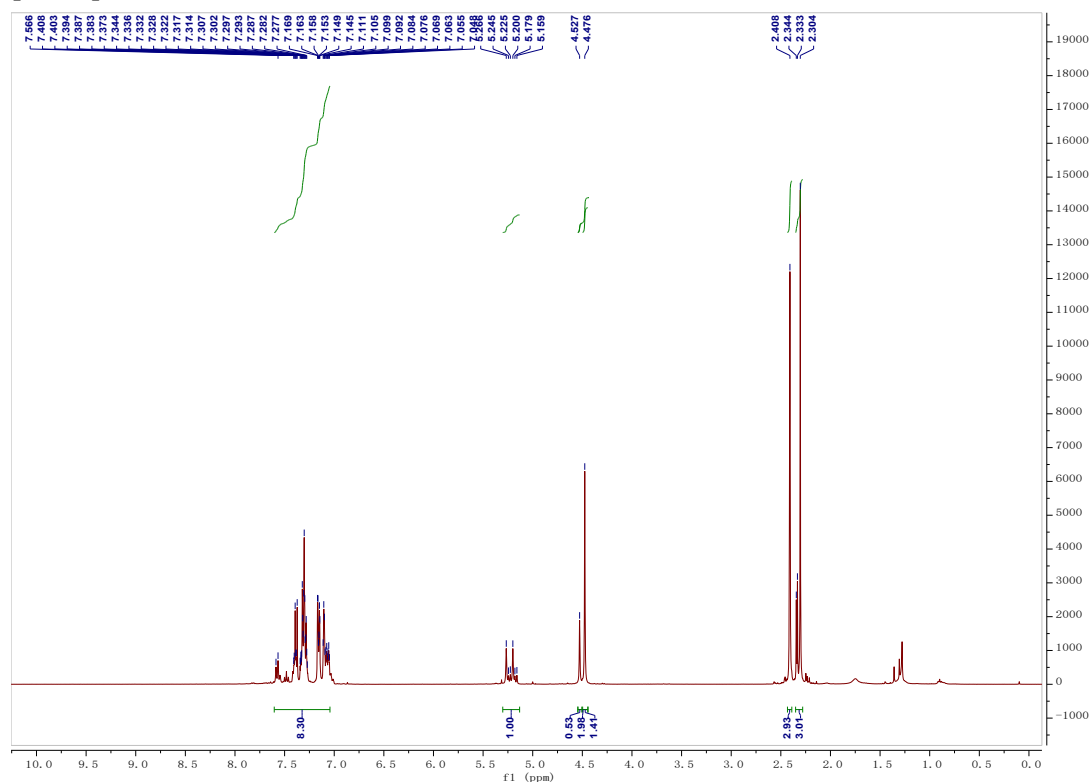

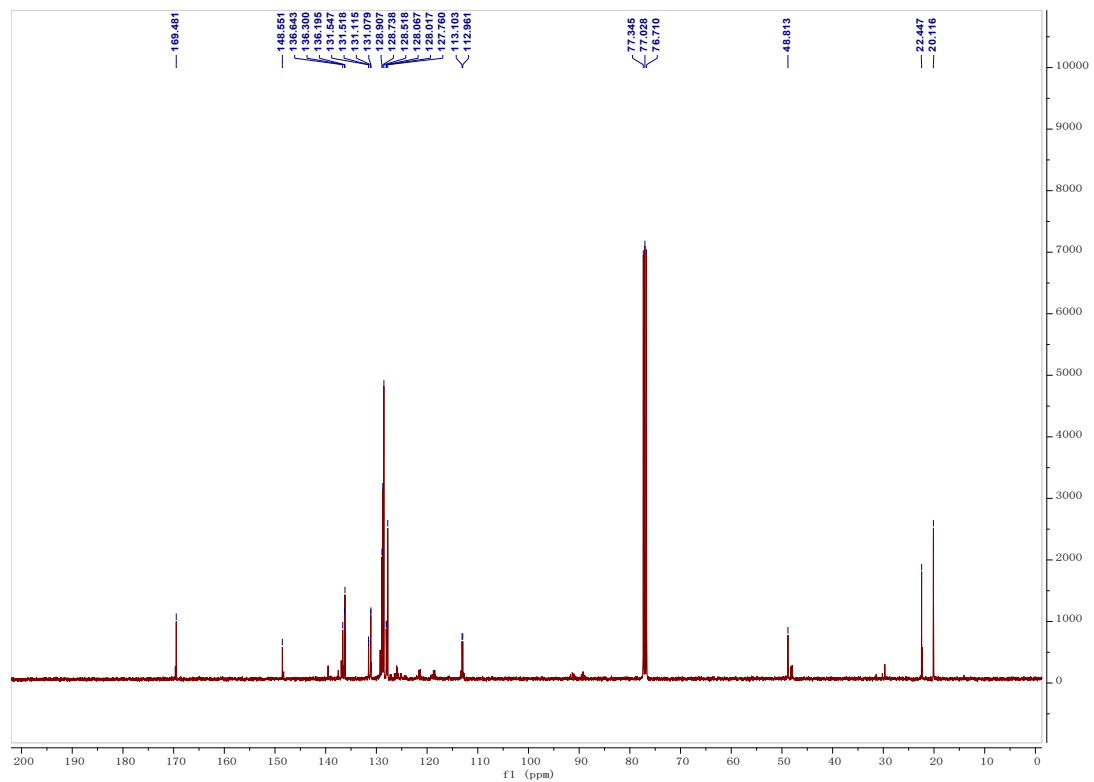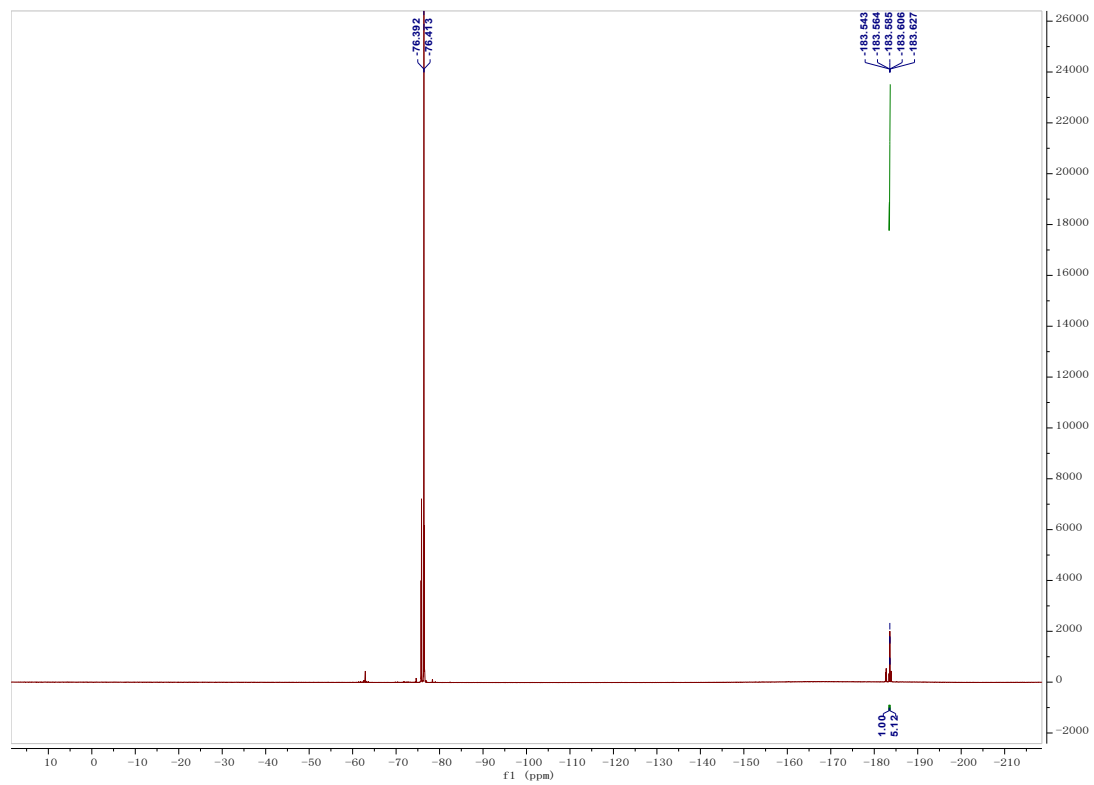

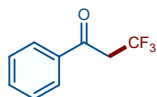

### 3,3,3-trifluoro-1-phenylpropan-1-one (6)

A yellow oil in 72% yield (96.5 mg);  $R_f = 0.50$  (Petroleum ether/EtOAc = 5/1).  $^1\text{H NMR}$  (400 MHz, Chloroform- $d$ )  $\delta$  9.96 – 7.94 (m, 2H), 7.67 – 7.63 (m, 1H), 7.54 – 7.50 (m, 2H), 3.83 (q,  $J = 10.0$  Hz, 2H).  $^{13}\text{C NMR}$  (101 MHz,  $\text{CDCl}_3$ )  $\delta$  189.8 (q,  $J = 2.5$  Hz), 135.8, 134.2, 129.0, 128.3, 124.1 (q,  $J = 278.1$  Hz), 42.0 (q,  $J = 28.3$  Hz).  $^{19}\text{F NMR}$  (376 MHz,  $\text{CDCl}_3$ )  $\delta$  -62.1. HRMS (ESI)  $m/z$  Calcd for  $\text{C}_9\text{H}_7\text{F}_3\text{NaO}^+$   $[\text{M}+\text{H}]^+$ : 211.0341, Found: 211.0341.

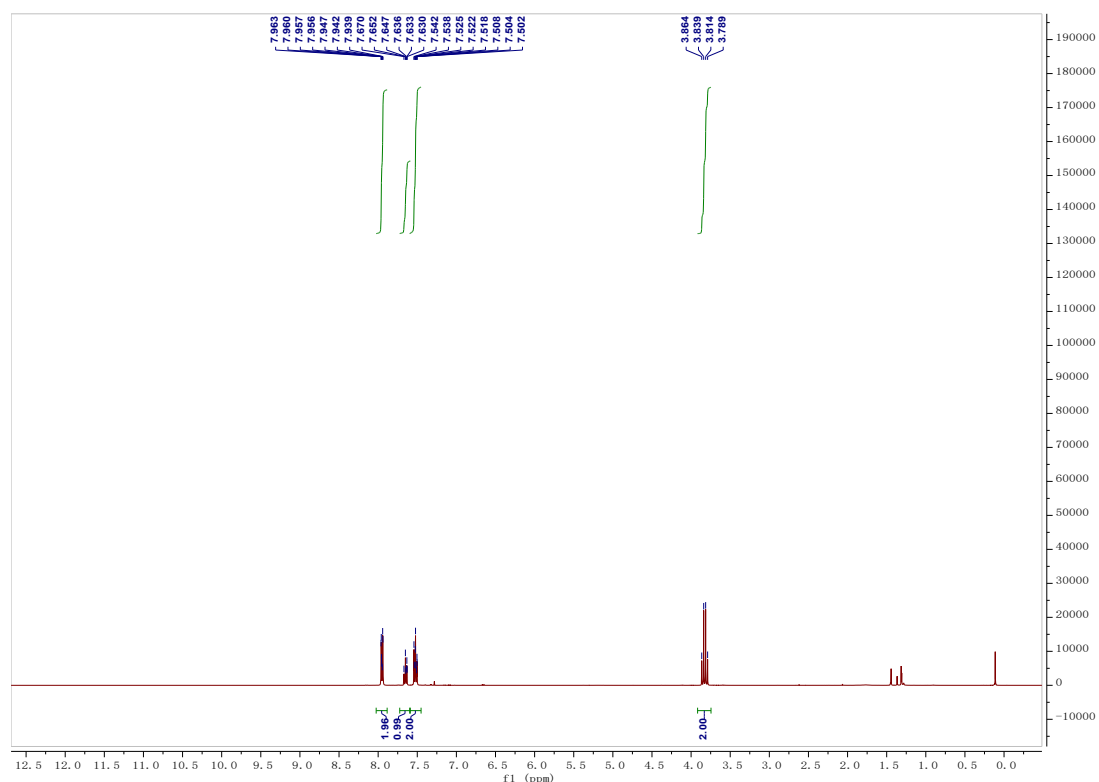

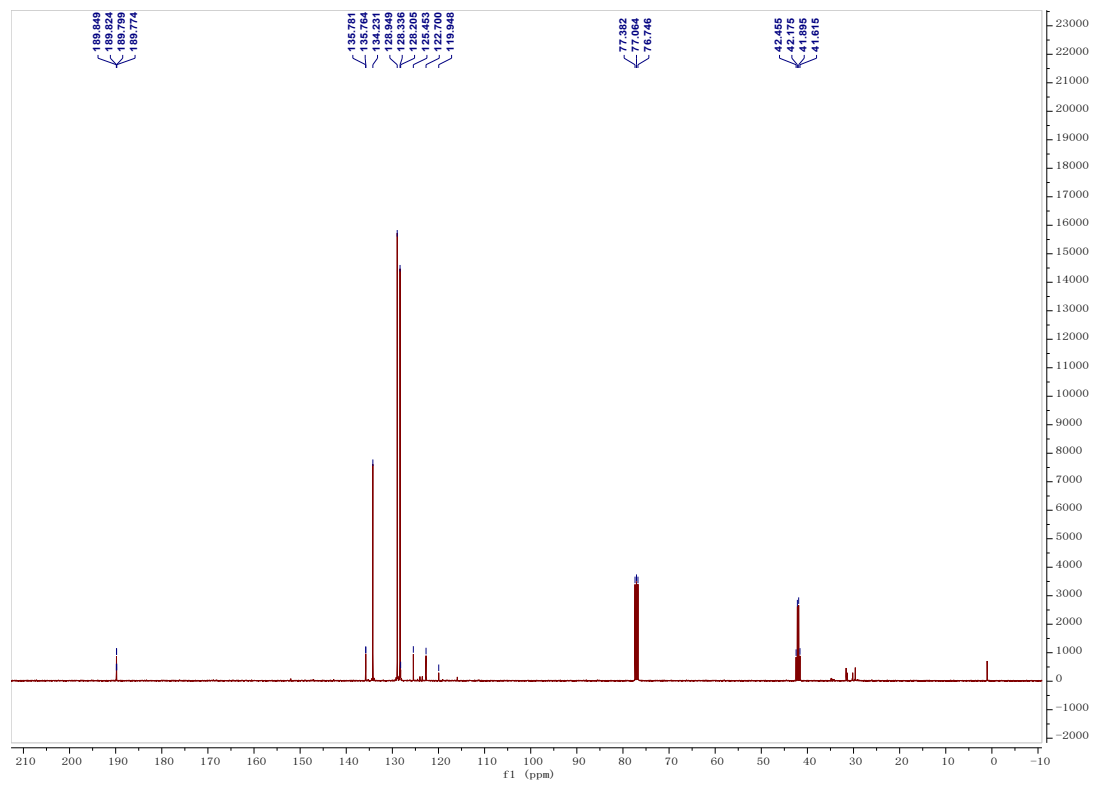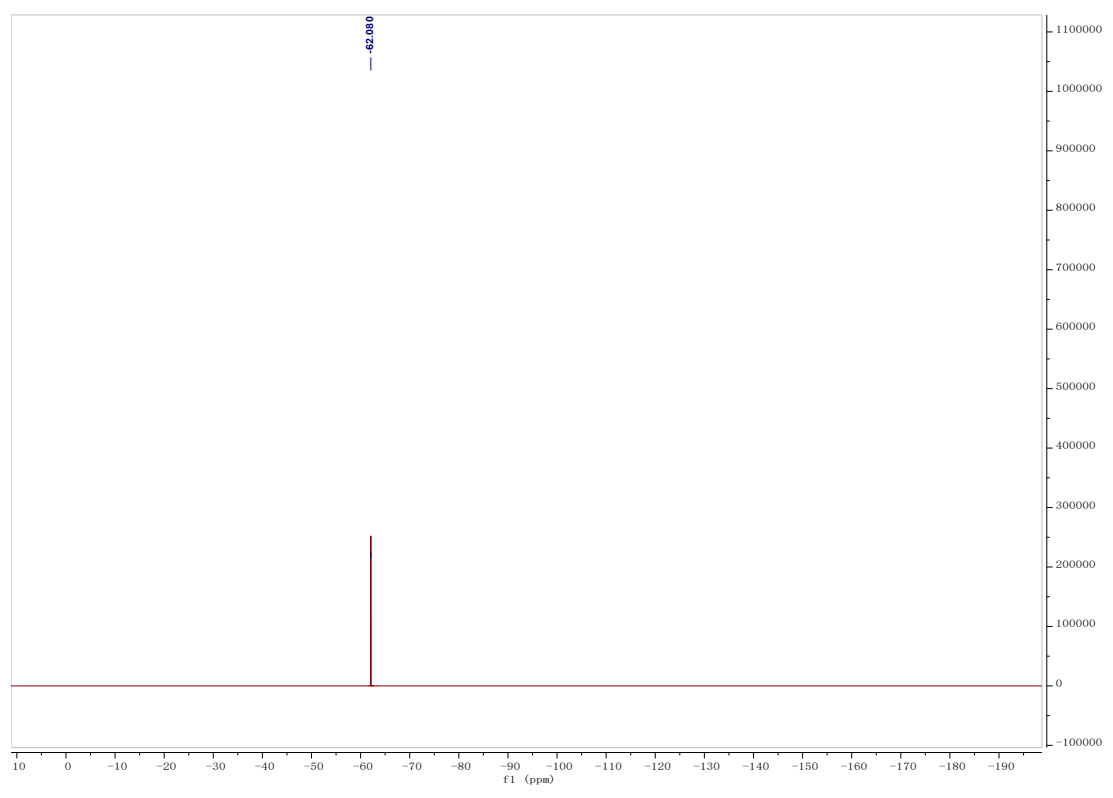

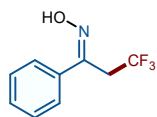

### 3,3,3-trifluoro-1-phenylpropan-1-one oxime (7)

A colorless oil in 64% yield (13.0 mg);  $R_f = 0.25$  (Petroleum ether/EtOAc = 5/1).  $^1\text{H}$  NMR (400 MHz, Chloroform- $d$ )  $\delta$  7.68 – 7.65 (m, 2H), 7.46 – 7.41 (m, 3H), 3.78 (q,  $J = 10.4$  Hz, 2H).  $^{13}\text{C}$  NMR (101 MHz,  $\text{CDCl}_3$ )  $\delta$  149.5, 134.3, 129.9, 128.7, 128.6 (q,  $J = 279.5$  Hz), 126.4, 30.8 (q,  $J = 31.7$  Hz).  $^{19}\text{F}$  NMR (376 MHz,  $\text{CDCl}_3$ )  $\delta$  -61.3. HRMS (ESI)  $m/z$  Calcd for  $\text{C}_9\text{H}_9\text{F}_3\text{NO}^+$   $[\text{M}+\text{H}]^+$ : 204.0631, Found: 204.0638.

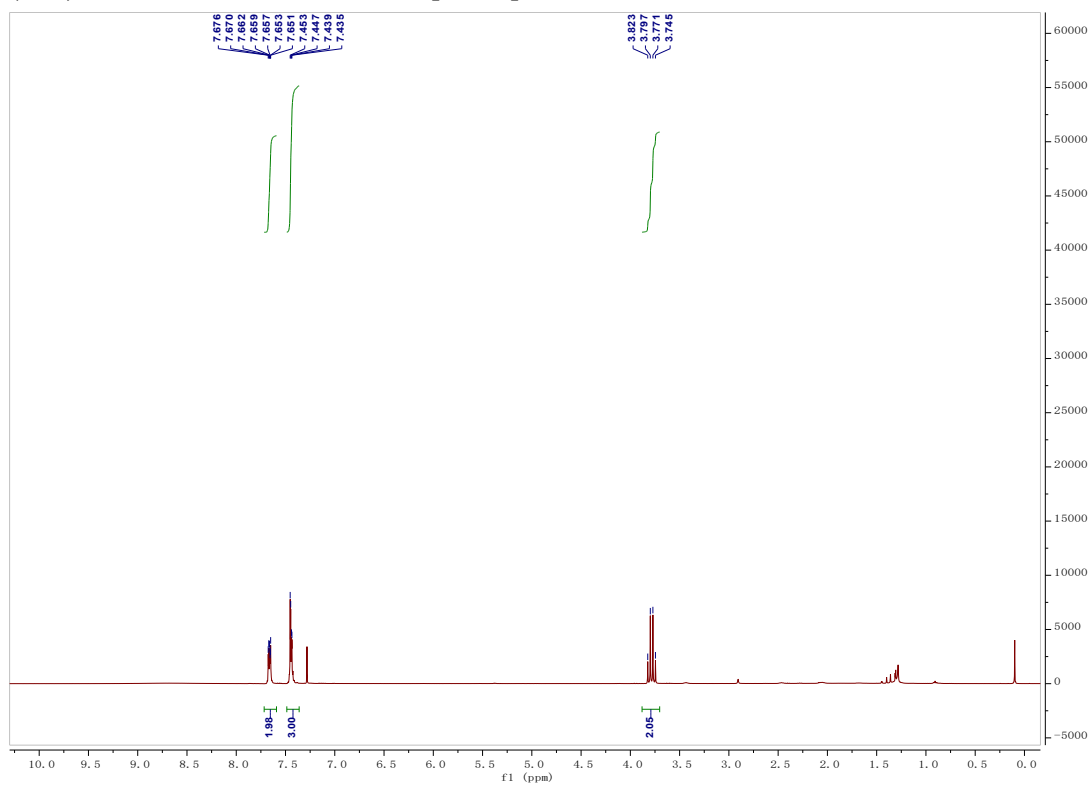

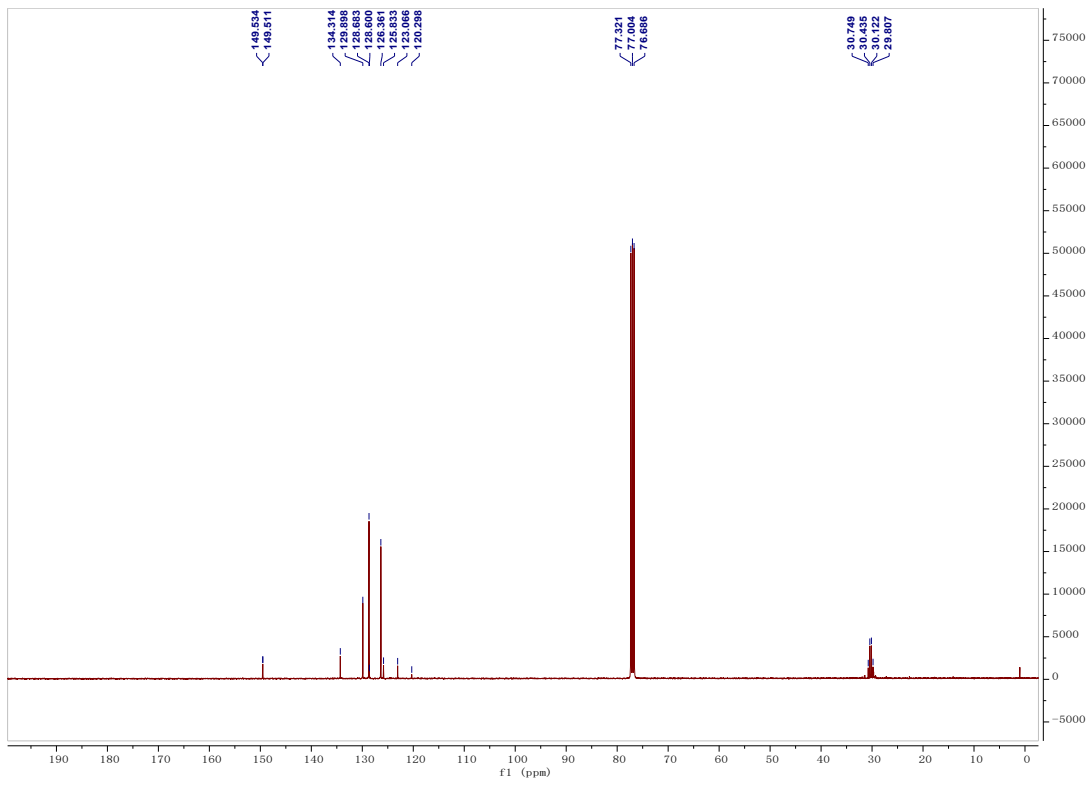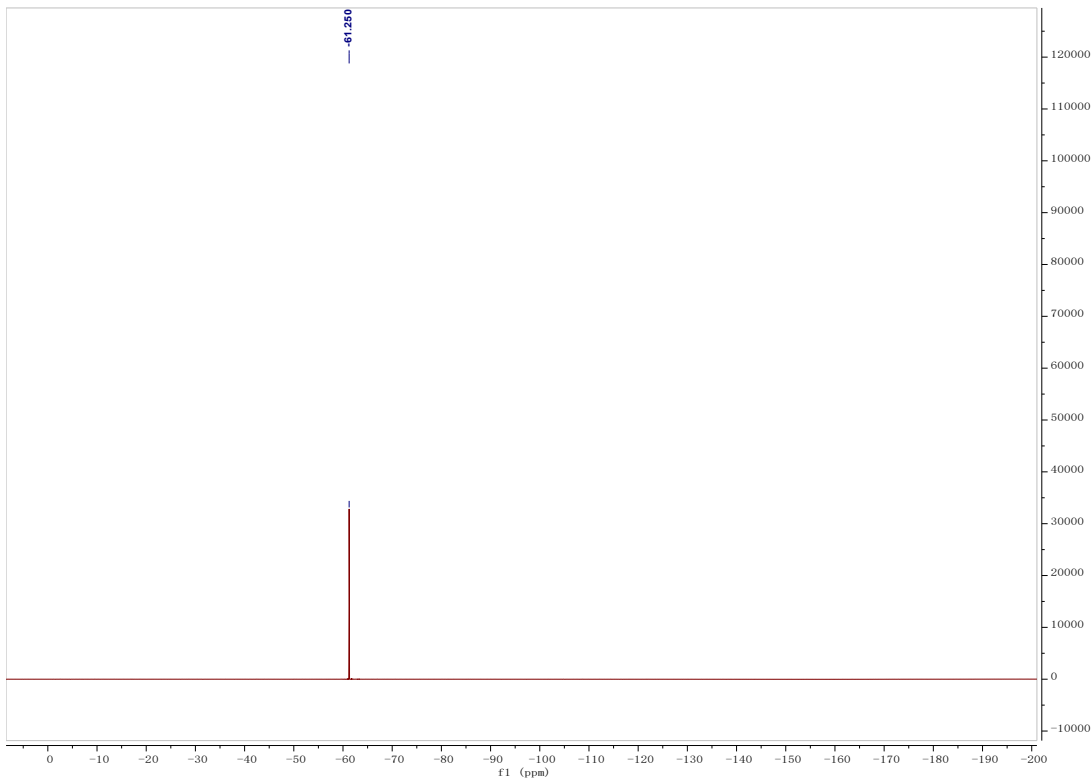

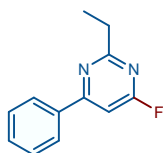

**(*E*)-*N*-benzyl-*N*-(1-(4-chloro-3-methylphenyl)-3,4,4,4-tetrafluoro-3-(trifluoromethyl) but-1-en-1-yl) acetamide (8)**

A yellow oil in 53% yield (49.5 mg);  $R_f = 0.45$  (Petroleum ether/EtOAc = 5/1).  $^1\text{H NMR}$  (400 MHz, Chloroform- $d$ )  $\delta$  8.11 – 8.08 (m, 2H), 7.53 – 7.51 (m, 3H), 7.13 (s, 1H), 3.03 (q,  $J = 7.6$  Hz, 2H), 1.44 (t,  $J = 7.6$  Hz, 3H).  $^{13}\text{C NMR}$  (101 MHz,  $\text{CDCl}_3$ )  $\delta$  173.5 (d,  $J = 13.3$  Hz), 171.0 (d,  $J = 251.2$  Hz), 168.6 (d,  $J = 7.3$  Hz), 136.1 (d,  $J = 5.1$  Hz), 131.4, 129.0, 127.3, 99.1 (d,  $J = 31.3$  Hz), 32.5, 12.3.  $^{19}\text{F NMR}$  (376 MHz,  $\text{CDCl}_3$ )  $\delta$  - 61.4. HRMS (ESI)  $m/z$  Calcd for  $\text{C}_{12}\text{H}_{12}\text{FN}_2^+$   $[\text{M}+\text{H}]^+$ : 203.0979, Found: 203.0990.

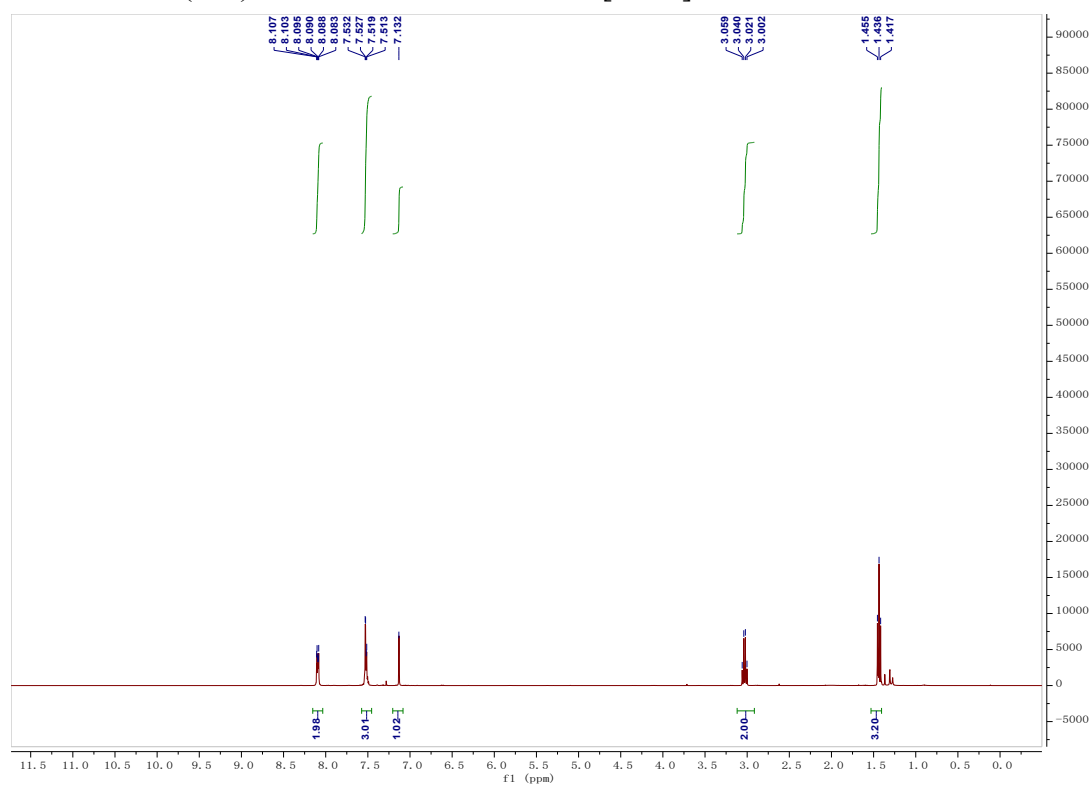

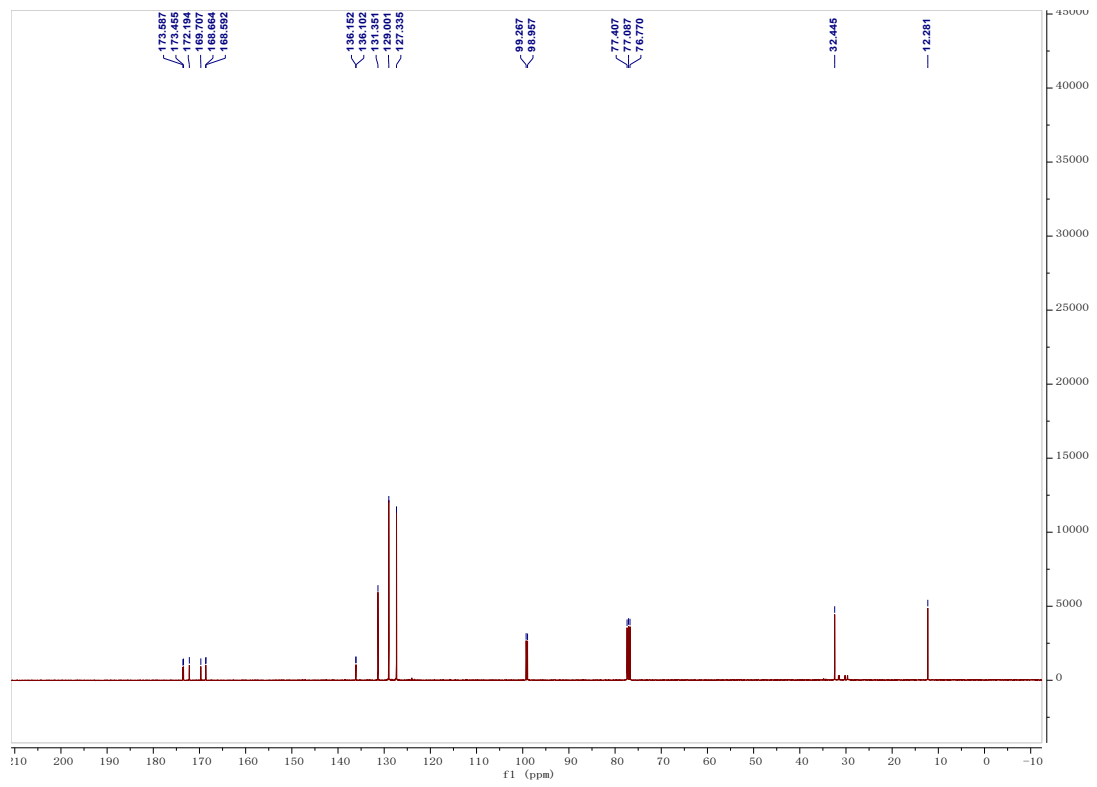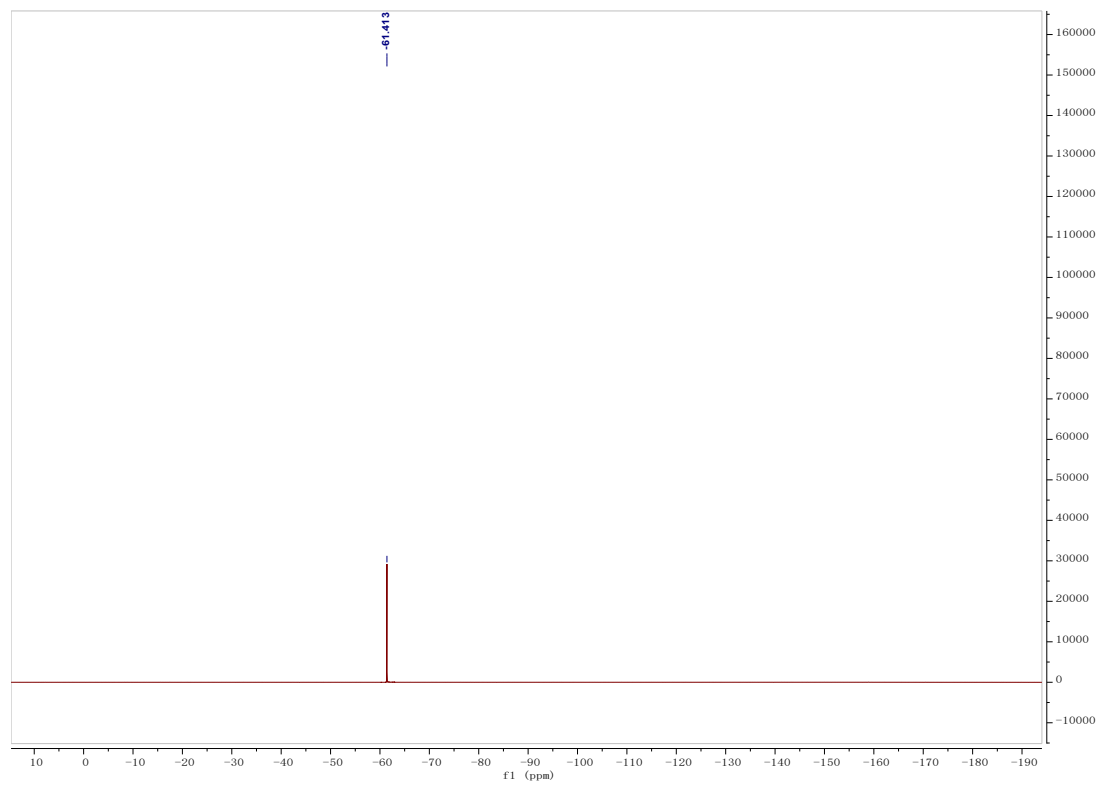

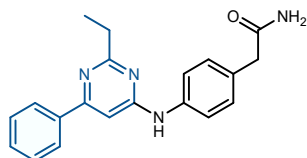

### 2-(4-((2-ethyl-6-phenylpyrimidin-4-yl)amino)phenyl)acetamide (9)

A white solid in 16% yield (18.7 mg);  $R_f = 0.35$  (DCM/MeOH = 20/1).  $^1\text{H NMR}$  (400 MHz, DMSO- $d_6$ )  $\delta$  9.55 (s, 1H), 8.03 – 8.01 (m, 2H), 7.65 (d,  $J = 8.4$  Hz, 2H), 7.52 – 7.50 (m, 3H), 7.42 (s, 1H), 7.23 (d,  $J = 8.8$  Hz, 2H), 7.05 (s, 1H), 6.86 (s, 1H), 2.81 (q,  $J = 7.6$  Hz, 2H), 1.33 (t,  $J = 7.6$  Hz, 3H).  $^{13}\text{C NMR}$  (101 MHz, DMSO)  $\delta$  172.9, 171.3, 161.8, 138.8, 137.8, 130.8, 130.6, 129.9, 129.3, 126.9, 120.1, 114.3, 99.5, 42.1, 32.6, 12.9. HRMS (ESI)  $m/z$  Calcd for  $\text{C}_{20}\text{H}_{21}\text{N}_4\text{O}^+$   $[\text{M}+\text{H}]^+$ : 333.1710, Found: 333.1718.

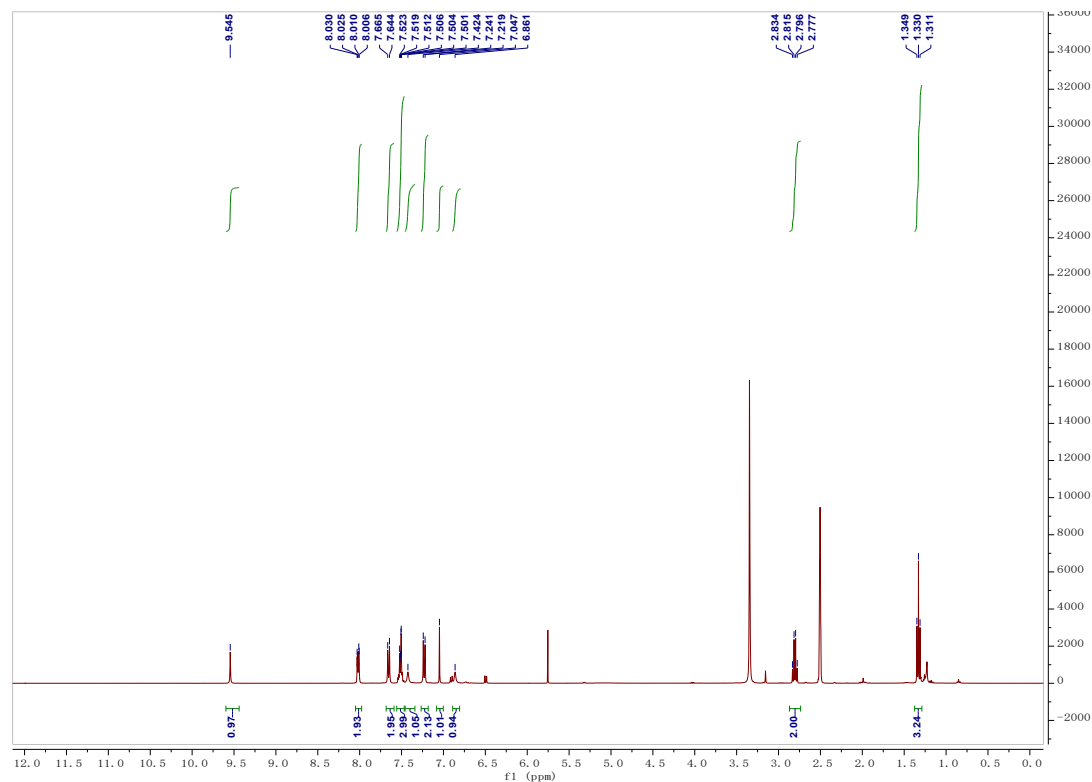

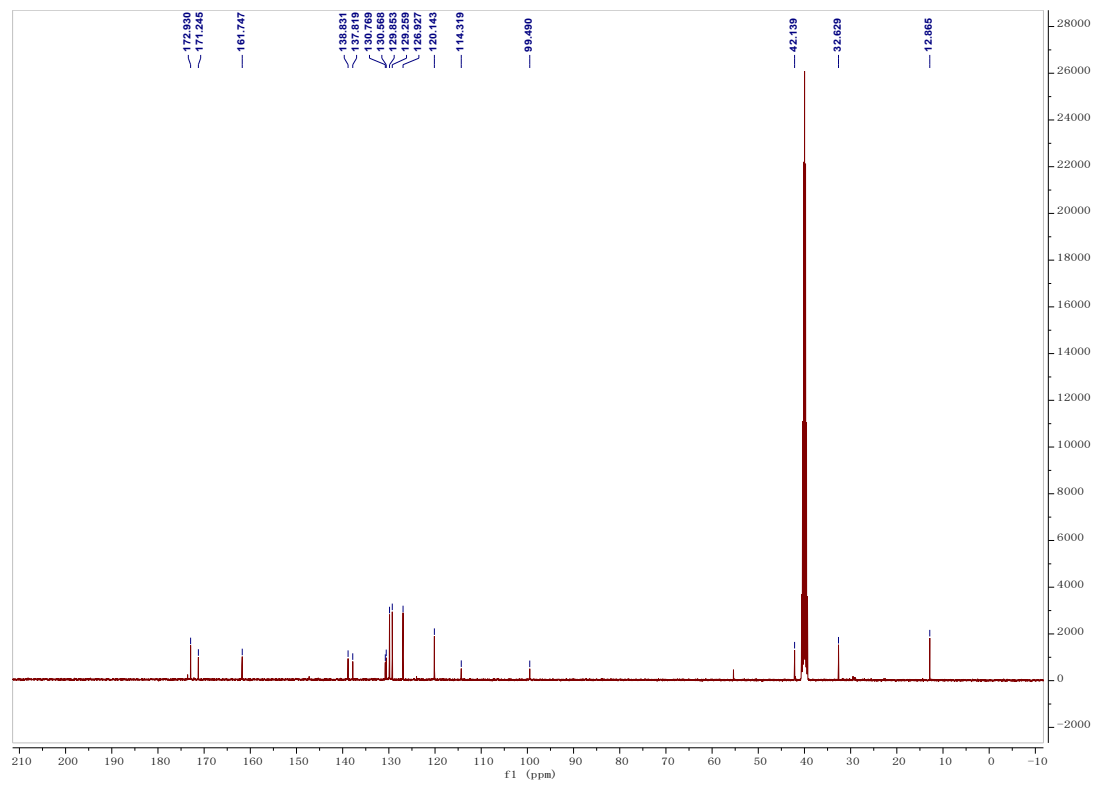

Supplement: d6qo00310a1.pdf [file d6qo00310a1.pdf]
